# Supplementary material
Source: Elsevier journal article supplement (http://library.osu.edu/projects/msa/suppmat/v253.i2.pp116-121/mmc1.pdf)
Supplement: mmc1 [file mmc1.pdf]

Tables S1-S9 contain the quantum number assignments, observed transition frequencies (in MHz), and the residuals (obs. - calc., also in MHz) from the least squares fits. The angular momentum coupling schemes used for the several isotopomers are described in the paper. There are six “quantum labels” specified for each state in these tables, which follow the notation appropriate to the version of Pickett's SPFIT program released in 2007. The first three numbers,  $J$ ,  $K_a$ , and  $K_c$  are the usual asymmetric top rotational quantum numbers. The fourth number,  $s$ , allows the inclusion of transitions with different levels of resolved hyperfine structure in a single fit as described below. The fifth and sixth numbers,  $nn_1$  and  $nn_2$  are aggregate quantum numbers used by the SPFIT program when there are not enough fields to input or output the complete set of quantum numbers arising from angular momentum coupling considerations.

For those isotopomers that do not include deuterium substitution, those transitions with resolved hyperfine structure arising from the nuclear quadrupole coupling interaction due to the Cl nucleus and the spin-rotation interaction due to the F atom are labeled with  $s = 0$ . If  $s = 1$ , the H-H spin-spin coupling interactions are also included. For the two species with a deuterium substitution,  $s = 0$  labels transitions with resolved hyperfine splittings arising from nuclear quadrupole coupling interactions due to both Cl and D nuclei, those transitions that additionally show the effects of the spin-rotation interaction due to the F atom have  $s = 1$ .

Table S1: Observed Transition Frequencies (in MHz) for CH<sub>2</sub>C<sup>35</sup>ClF

| $J'$ | $K_a'$ | $K_c'$ | $s'$ | $m_1'$ | $m_2'$ | $J''$ | $K_a''$ | $K_c''$ | $s''$ | $m_1''$ | $m_2''$ | Observed  | Obs - Calc |
|------|--------|--------|------|--------|--------|-------|---------|---------|-------|---------|---------|-----------|------------|
| 1    | 1      | 0      | 0    | 1      | 1      | 1     | 0       | 1       | 0     | 1       | 0       | 7206.4749 | -0.0005    |
| 1    | 1      | 0      | 0    | 1      | 1      | 1     | 0       | 1       | 0     | 1       | 1       | 7206.4791 | -0.0001    |
| 1    | 1      | 0      | 0    | 1      | 0      | 1     | 0       | 1       | 0     | 1       | 1       | 7206.4870 | 0.0003     |
| 1    | 1      | 0      | 1    | 10     | 2      | 1     | 0       | 1       | 1     | 18      | 1       | 7221.9070 | -0.0006    |
| 1    | 1      | 0      | 1    | 10     | 2      | 1     | 0       | 1       | 1     | 11      | 2       | 7221.9126 | 0.0013     |
| 1    | 1      | 0      | 1    | 14     | 1      | 1     | 0       | 1       | 1     | 15      | 1       | 7221.9126 | 0.0013     |
| 1    | 1      | 0      | 1    | 20     | 0      | 1     | 0       | 1       | 1     | 18      | 1       | 7221.9126 | 0.0015     |
| 1    | 1      | 0      | 1    | 9      | 2      | 1     | 0       | 1       | 1     | 17      | 1       | 7221.9145 | -0.0007    |
| 1    | 1      | 0      | 1    | 7      | 2      | 1     | 0       | 1       | 1     | 15      | 1       | 7221.9197 | 0.0024     |
| 1    | 1      | 0      | 1    | 4      | 3      | 1     | 0       | 1       | 1     | 11      | 2       | 7221.9197 | 0.0017     |
| 1    | 1      | 0      | 1    | 12     | 1      | 1     | 0       | 1       | 1     | 12      | 1       | 7227.9329 | -0.0037    |
| 1    | 1      | 0      | 1    | 3      | 3      | 1     | 0       | 1       | 1     | 3       | 3       | 7227.9407 | 0.0001     |
| 1    | 1      | 0      | 1    | 5      | 2      | 1     | 0       | 1       | 1     | 5       | 2       | 7227.9447 | 0.0006     |
| 1    | 1      | 0      | 1    | 0      | 4      | 1     | 0       | 1       | 1     | 0       | 4       | 7227.9470 | 0.0002     |
| 1    | 1      | 0      | 1    | 1      | 3      | 1     | 0       | 1       | 1     | 1       | 3       | 7227.9470 | -0.0017    |
| 1    | 1      | 0      | 1    | 2      | 3      | 1     | 0       | 1       | 1     | 2       | 3       | 7227.9566 | 0.0025     |
| 1    | 1      | 0      | 0    | 2      | 2      | 1     | 0       | 1       | 0     | 3       | 3       | 7236.5110 | -0.0041    |
| 1    | 1      | 0      | 0    | 2      | 1      | 1     | 0       | 1       | 0     | 3       | 2       | 7236.5110 | -0.0049    |
| 1    | 1      | 0      | 1    | 17     | 1      | 1     | 0       | 1       | 1     | 9       | 2       | 7239.3140 | 0.0007     |
| 1    | 1      | 0      | 1    | 15     | 1      | 1     | 0       | 1       | 1     | 7       | 2       | 7239.3162 | -0.0001    |
| 1    | 1      | 0      | 1    | 11     | 2      | 1     | 0       | 1       | 1     | 4       | 3       | 7239.3162 | -0.0009    |
| 1    | 1      | 0      | 1    | 11     | 2      | 1     | 0       | 1       | 1     | 10      | 2       | 7239.3223 | 0.0023     |
| 1    | 1      | 0      | 1    | 21     | 0      | 1     | 0       | 1       | 1     | 13      | 1       | 7239.3223 | 0.0012     |
| 1    | 1      | 0      | 1    | 18     | 1      | 1     | 0       | 1       | 1     | 16      | 1       | 7239.3223 | -0.0006    |
| 1    | 1      | 0      | 1    | 18     | 1      | 1     | 0       | 1       | 1     | 10      | 2       | 7239.3267 | -0.0008    |
| 1    | 1      | 0      | 0    | 3      | 2      | 1     | 0       | 1       | 0     | 2       | 1       | 7246.1814 | 0.0039     |
| 1    | 1      | 0      | 0    | 3      | 3      | 1     | 0       | 1       | 0     | 2       | 2       | 7246.1907 | 0.0027     |
| 1    | 1      | 0      | 1    | 9      | 2      | 1     | 0       | 1       | 1     | 9       | 2       | 7254.7509 | 0.0017     |
| 1    | 1      | 0      | 1    | 10     | 2      | 1     | 0       | 1       | 1     | 10      | 2       | 7254.7509 | -0.0012    |
| 1    | 1      | 0      | 1    | 7      | 2      | 1     | 0       | 1       | 1     | 7       | 2       | 7254.7550 | 0.0006     |
| 1    | 1      | 0      | 1    | 4      | 3      | 1     | 0       | 1       | 1     | 4       | 3       | 7254.7578 | 0.0018     |
| 5    | 2      | 3      | 0    | 6      | 5      | 5     | 2       | 4       | 0     | 6       | 5       | 8529.4923 | 0.0011     |
| 5    | 2      | 3      | 0    | 6      | 6      | 5     | 2       | 4       | 0     | 6       | 6       | 8529.4923 | -0.0014    |
| 5    | 2      | 3      | 0    | 5      | 4      | 5     | 2       | 4       | 0     | 5       | 4       | 8530.0853 | 0.0001     |
| 5    | 2      | 3      | 0    | 5      | 5      | 5     | 2       | 4       | 0     | 5       | 5       | 8530.0853 | -0.0024    |
| 5    | 2      | 3      | 0    | 7      | 6      | 5     | 2       | 4       | 0     | 7       | 6       | 8531.5929 | 0.0022     |
| 5    | 2      | 3      | 0    | 7      | 7      | 5     | 2       | 4       | 0     | 7       | 7       | 8531.5929 | -0.0004    |
| 5    | 2      | 3      | 0    | 4      | 3      | 5     | 2       | 4       | 0     | 4       | 3       | 8532.1791 | 0.0002     |
| 5    | 2      | 3      | 0    | 4      | 4      | 5     | 2       | 4       | 0     | 4       | 4       | 8532.1791 | -0.0024    |
| 1    | 0      | 1      | 0    | 2      | 1      | 0     | 0       | 0       | 0     | 2       | 1       | 8535.8723 | 0.0006     |
| 1    | 0      | 1      | 0    | 2      | 2      | 0     | 0       | 0       | 0     | 2       | 2       | 8535.8723 | -0.0025    |
| 1    | 0      | 1      | 0    | 3      | 2      | 0     | 0       | 0       | 0     | 2       | 1       | 8554.1106 | 0.0033     |
| 1    | 0      | 1      | 0    | 3      | 3      | 0     | 0       | 0       | 0     | 2       | 2       | 8554.1174 | 0.0033     |

Table S1: Observed Transition Frequencies (in MHz) for CH<sub>2</sub>C<sup>35</sup>ClF

|   |   |   |   |   |   |   |   |   |   |   |   |            |         |
|---|---|---|---|---|---|---|---|---|---|---|---|------------|---------|
| 1 | 0 | 1 | 0 | 1 | 1 | 0 | 0 | 0 | 0 | 2 | 2 | 8568.7094  | -0.0025 |
| 2 | 1 | 1 | 0 | 2 | 1 | 2 | 0 | 2 | 0 | 1 | 1 | 9185.7167  | -0.0008 |
| 2 | 1 | 1 | 0 | 2 | 2 | 2 | 0 | 2 | 0 | 1 | 1 | 9185.7311  | 0.0008  |
| 2 | 1 | 1 | 0 | 3 | 2 | 2 | 0 | 2 | 0 | 4 | 3 | 9191.4363  | -0.0058 |
| 2 | 1 | 1 | 0 | 3 | 3 | 2 | 0 | 2 | 0 | 4 | 4 | 9191.4363  | -0.0081 |
| 2 | 1 | 1 | 0 | 1 | 0 | 2 | 0 | 2 | 0 | 1 | 1 | 9195.3946  | 0.0019  |
| 2 | 1 | 1 | 0 | 1 | 1 | 2 | 0 | 2 | 0 | 1 | 1 | 9195.4082  | -0.0005 |
| 2 | 1 | 1 | 0 | 1 | 1 | 2 | 0 | 2 | 0 | 1 | 0 | 9195.4182  | -0.0017 |
| 2 | 1 | 1 | 0 | 3 | 2 | 2 | 0 | 2 | 0 | 2 | 1 | 9196.4711  | 0.0019  |
| 2 | 1 | 1 | 0 | 3 | 3 | 2 | 0 | 2 | 0 | 2 | 2 | 9196.4777  | 0.0024  |
| 2 | 1 | 1 | 0 | 4 | 3 | 2 | 0 | 2 | 0 | 4 | 3 | 9201.1009  | 0.0004  |
| 2 | 1 | 1 | 0 | 4 | 4 | 2 | 0 | 2 | 0 | 4 | 4 | 9201.1045  | -0.0015 |
| 2 | 1 | 1 | 0 | 2 | 1 | 2 | 0 | 2 | 0 | 2 | 1 | 9203.3757  | -0.0012 |
| 2 | 1 | 1 | 0 | 2 | 2 | 2 | 0 | 2 | 0 | 2 | 2 | 9203.3802  | -0.0006 |
| 2 | 1 | 1 | 0 | 3 | 2 | 2 | 0 | 2 | 0 | 3 | 2 | 9209.1030  | -0.0008 |
| 2 | 1 | 1 | 0 | 3 | 3 | 2 | 0 | 2 | 0 | 3 | 3 | 9209.1077  | -0.0007 |
| 2 | 1 | 1 | 0 | 1 | 0 | 2 | 0 | 2 | 0 | 2 | 1 | 9213.0498  | -0.0023 |
| 2 | 1 | 1 | 0 | 1 | 1 | 2 | 0 | 2 | 0 | 2 | 2 | 9213.0571  | -0.0021 |
| 2 | 1 | 1 | 0 | 1 | 1 | 2 | 0 | 2 | 0 | 2 | 1 | 9213.0679  | -0.0002 |
| 2 | 1 | 1 | 0 | 2 | 1 | 2 | 0 | 2 | 0 | 3 | 2 | 9216.0090  | -0.0025 |
| 2 | 1 | 1 | 0 | 2 | 2 | 2 | 0 | 2 | 0 | 3 | 3 | 9216.0090  | -0.0048 |
| 2 | 1 | 1 | 0 | 4 | 3 | 2 | 0 | 2 | 0 | 3 | 2 | 9218.7673  | 0.0051  |
| 2 | 1 | 1 | 0 | 4 | 4 | 2 | 0 | 2 | 0 | 3 | 3 | 9218.7753  | 0.0053  |
| 3 | 1 | 2 | 0 | 4 | 3 | 3 | 1 | 3 | 0 | 5 | 4 | 9870.4895  | -0.0045 |
| 3 | 1 | 2 | 0 | 4 | 4 | 3 | 1 | 3 | 0 | 5 | 5 | 9870.4895  | -0.0070 |
| 3 | 1 | 2 | 0 | 3 | 2 | 3 | 1 | 3 | 0 | 2 | 1 | 9870.9653  | 0.0029  |
| 3 | 1 | 2 | 0 | 3 | 3 | 3 | 1 | 3 | 0 | 2 | 2 | 9870.9653  | 0.0006  |
| 3 | 1 | 2 | 0 | 4 | 3 | 3 | 1 | 3 | 0 | 3 | 2 | 9877.4077  | 0.0040  |
| 3 | 1 | 2 | 0 | 4 | 4 | 3 | 1 | 3 | 0 | 3 | 3 | 9877.4128  | 0.0042  |
| 3 | 1 | 2 | 0 | 4 | 3 | 3 | 1 | 3 | 0 | 4 | 3 | 9883.4678  | 0.0024  |
| 3 | 1 | 2 | 0 | 4 | 4 | 3 | 1 | 3 | 0 | 4 | 4 | 9883.4678  | -0.0017 |
| 3 | 1 | 2 | 0 | 3 | 2 | 3 | 1 | 3 | 0 | 3 | 2 | 9883.9450  | 0.0025  |
| 3 | 1 | 2 | 0 | 3 | 3 | 3 | 1 | 3 | 0 | 3 | 3 | 9883.9450  | -0.0014 |
| 3 | 1 | 2 | 0 | 5 | 4 | 3 | 1 | 3 | 0 | 5 | 4 | 9884.4990  | 0.0043  |
| 3 | 1 | 2 | 0 | 5 | 5 | 3 | 1 | 3 | 0 | 5 | 5 | 9884.4990  | -0.0002 |
| 3 | 1 | 2 | 0 | 2 | 1 | 3 | 1 | 3 | 0 | 2 | 1 | 9884.9693  | -0.0012 |
| 3 | 1 | 2 | 0 | 2 | 2 | 3 | 1 | 3 | 0 | 2 | 2 | 9884.9724  | -0.0024 |
| 3 | 1 | 2 | 0 | 3 | 2 | 3 | 1 | 3 | 0 | 4 | 3 | 9890.0009  | -0.0032 |
| 3 | 1 | 2 | 0 | 3 | 3 | 3 | 1 | 3 | 0 | 4 | 4 | 9890.0009  | -0.0064 |
| 3 | 1 | 2 | 0 | 5 | 4 | 3 | 1 | 3 | 0 | 4 | 3 | 9897.4733  | 0.0072  |
| 3 | 1 | 2 | 0 | 5 | 5 | 3 | 1 | 3 | 0 | 4 | 4 | 9897.4800  | 0.0078  |
| 3 | 1 | 2 | 0 | 2 | 1 | 3 | 1 | 3 | 0 | 3 | 2 | 9897.9468  | -0.0038 |
| 3 | 1 | 2 | 0 | 2 | 2 | 3 | 1 | 3 | 0 | 3 | 3 | 9897.9528  | -0.0037 |
| 3 | 1 | 2 | 0 | 4 | 4 | 2 | 2 | 1 | 0 | 3 | 3 | 11150.6494 | 0.0039  |

Table S1: Observed Transition Frequencies (in MHz) for CH<sub>2</sub>C<sup>35</sup>ClF

|   |   |   |   |   |   |   |   |   |   |   |   |            |         |
|---|---|---|---|---|---|---|---|---|---|---|---|------------|---------|
| 3 | 1 | 2 | 0 | 4 | 3 | 2 | 2 | 1 | 0 | 3 | 2 | 11150.6494 | 0.0026  |
| 3 | 1 | 2 | 0 | 3 | 3 | 2 | 2 | 1 | 0 | 3 | 3 | 11157.1824 | -0.0009 |
| 3 | 1 | 2 | 0 | 3 | 2 | 2 | 2 | 1 | 0 | 3 | 2 | 11157.1824 | -0.0031 |
| 3 | 1 | 2 | 0 | 4 | 4 | 2 | 2 | 1 | 0 | 4 | 4 | 11168.8872 | 0.0014  |
| 3 | 1 | 2 | 0 | 4 | 3 | 2 | 2 | 1 | 0 | 4 | 3 | 11168.8925 | 0.0005  |
| 3 | 1 | 2 | 0 | 3 | 2 | 2 | 2 | 1 | 0 | 2 | 1 | 11170.2141 | 0.0022  |
| 3 | 1 | 2 | 0 | 3 | 3 | 2 | 2 | 1 | 0 | 2 | 2 | 11170.2141 | 0.0009  |
| 3 | 1 | 2 | 0 | 2 | 2 | 2 | 2 | 1 | 0 | 3 | 3 | 11171.1887 | -0.0047 |
| 3 | 1 | 2 | 0 | 2 | 1 | 2 | 2 | 1 | 0 | 3 | 2 | 11171.1887 | -0.0049 |
| 3 | 1 | 2 | 0 | 3 | 3 | 2 | 2 | 1 | 0 | 4 | 4 | 11175.4196 | -0.0040 |
| 3 | 1 | 2 | 0 | 3 | 2 | 2 | 2 | 1 | 0 | 4 | 3 | 11175.4267 | -0.0040 |
| 3 | 1 | 2 | 0 | 2 | 1 | 2 | 2 | 1 | 0 | 2 | 1 | 11184.2210 | 0.0010  |
| 3 | 1 | 2 | 0 | 2 | 2 | 2 | 2 | 1 | 0 | 2 | 2 | 11184.2210 | -0.0023 |
| 3 | 1 | 2 | 0 | 2 | 2 | 2 | 2 | 1 | 0 | 1 | 1 | 11202.4678 | -0.0012 |
| 3 | 1 | 2 | 0 | 2 | 1 | 2 | 2 | 1 | 0 | 1 | 0 | 11202.4707 | 0.0002  |
| 2 | 0 | 2 | 0 | 3 | 2 | 1 | 1 | 1 | 0 | 2 | 1 | 11184.7520 | 0.0020  |
| 2 | 0 | 2 | 0 | 3 | 3 | 1 | 1 | 1 | 0 | 2 | 2 | 11184.7567 | 0.0014  |
| 2 | 0 | 2 | 0 | 3 | 3 | 1 | 1 | 1 | 0 | 3 | 3 | 11194.4215 | 0.0005  |
| 2 | 0 | 2 | 0 | 3 | 2 | 1 | 1 | 1 | 0 | 3 | 2 | 11194.4215 | -0.0009 |
| 2 | 0 | 2 | 0 | 2 | 1 | 1 | 1 | 1 | 0 | 2 | 1 | 11197.3862 | 0.0016  |
| 2 | 0 | 2 | 0 | 2 | 2 | 1 | 1 | 1 | 0 | 2 | 2 | 11197.3862 | -0.0021 |
| 2 | 0 | 2 | 0 | 2 | 2 | 1 | 1 | 1 | 0 | 3 | 3 | 11207.0507 | -0.0034 |
| 2 | 0 | 2 | 0 | 2 | 1 | 1 | 1 | 1 | 0 | 3 | 2 | 11207.0540 | -0.0030 |
| 2 | 0 | 2 | 0 | 4 | 3 | 1 | 1 | 1 | 0 | 3 | 2 | 11212.0896 | 0.0055  |
| 2 | 0 | 2 | 0 | 4 | 4 | 1 | 1 | 1 | 0 | 3 | 3 | 11212.0896 | 0.0046  |
| 2 | 0 | 2 | 0 | 2 | 1 | 1 | 1 | 1 | 0 | 1 | 0 | 11214.7820 | 0.0010  |
| 2 | 0 | 2 | 0 | 2 | 1 | 1 | 1 | 1 | 0 | 1 | 1 | 11214.7907 | 0.0031  |
| 2 | 0 | 2 | 0 | 2 | 2 | 1 | 1 | 1 | 0 | 1 | 1 | 11214.7974 | 0.0008  |
| 2 | 0 | 2 | 0 | 1 | 0 | 1 | 1 | 1 | 0 | 2 | 1 | 11215.0306 | -0.0023 |
| 2 | 0 | 2 | 0 | 1 | 1 | 1 | 1 | 1 | 0 | 2 | 2 | 11215.0350 | -0.0038 |
| 2 | 0 | 2 | 0 | 1 | 0 | 1 | 1 | 1 | 0 | 1 | 1 | 11232.4356 | -0.0003 |
| 2 | 0 | 2 | 0 | 1 | 1 | 1 | 1 | 1 | 0 | 1 | 0 | 11232.4395 | -0.0009 |
| 2 | 0 | 2 | 0 | 1 | 1 | 1 | 1 | 1 | 0 | 1 | 1 | 11232.4459 | -0.0012 |
| 3 | 1 | 2 | 0 | 3 | 2 | 3 | 0 | 3 | 0 | 2 | 1 | 12642.6583 | 0.0049  |
| 3 | 1 | 2 | 0 | 3 | 3 | 3 | 0 | 3 | 0 | 2 | 2 | 12642.6583 | 0.0015  |
| 3 | 1 | 2 | 0 | 4 | 3 | 3 | 0 | 3 | 0 | 5 | 4 | 12644.0171 | -0.0060 |
| 3 | 1 | 2 | 0 | 4 | 4 | 3 | 0 | 3 | 0 | 5 | 5 | 12644.0171 | -0.0096 |
| 3 | 1 | 2 | 0 | 4 | 3 | 3 | 0 | 3 | 0 | 3 | 2 | 12653.0658 | 0.0040  |
| 3 | 1 | 2 | 0 | 4 | 4 | 3 | 0 | 3 | 0 | 3 | 3 | 12653.0720 | 0.0043  |
| 3 | 1 | 2 | 0 | 2 | 1 | 3 | 0 | 3 | 0 | 2 | 1 | 12656.6613 | -0.0002 |
| 3 | 1 | 2 | 0 | 2 | 2 | 3 | 0 | 3 | 0 | 2 | 2 | 12656.6666 | -0.0003 |
| 3 | 1 | 2 | 0 | 5 | 4 | 3 | 0 | 3 | 0 | 5 | 4 | 12658.0260 | 0.0022  |
| 3 | 1 | 2 | 0 | 5 | 5 | 3 | 0 | 3 | 0 | 5 | 5 | 12658.0284 | -0.0010 |
| 3 | 1 | 2 | 0 | 3 | 2 | 3 | 0 | 3 | 0 | 3 | 2 | 12659.6001 | -0.0005 |

Table S1: Observed Transition Frequencies (in MHz) for CH<sub>2</sub>C<sup>35</sup>ClF

|   |   |   |   |   |   |   |   |   |   |   |   |            |         |
|---|---|---|---|---|---|---|---|---|---|---|---|------------|---------|
| 3 | 1 | 2 | 0 | 3 | 3 | 3 | 0 | 3 | 0 | 3 | 3 | 12659.6047 | -0.0008 |
| 3 | 1 | 2 | 0 | 4 | 3 | 3 | 0 | 3 | 0 | 4 | 3 | 12660.9922 | 0.0005  |
| 3 | 1 | 2 | 0 | 4 | 4 | 3 | 0 | 3 | 0 | 4 | 4 | 12660.9958 | -0.0011 |
| 3 | 1 | 2 | 0 | 3 | 2 | 3 | 0 | 3 | 0 | 4 | 3 | 12667.5281 | -0.0024 |
| 3 | 1 | 2 | 0 | 3 | 3 | 3 | 0 | 3 | 0 | 4 | 4 | 12667.5281 | -0.0066 |
| 3 | 1 | 2 | 0 | 2 | 1 | 3 | 0 | 3 | 0 | 3 | 2 | 12673.6047 | -0.0040 |
| 3 | 1 | 2 | 0 | 2 | 2 | 3 | 0 | 3 | 0 | 3 | 3 | 12673.6119 | -0.0037 |
| 3 | 1 | 2 | 0 | 5 | 4 | 3 | 0 | 3 | 0 | 4 | 3 | 12674.9995 | 0.0070  |
| 3 | 1 | 2 | 0 | 5 | 5 | 3 | 0 | 3 | 0 | 4 | 4 | 12675.0071 | 0.0075  |
| 1 | 1 | 1 | 0 | 1 | 1 | 0 | 0 | 0 | 0 | 2 | 2 | 14120.2803 | -0.0025 |
| 1 | 1 | 1 | 0 | 3 | 2 | 0 | 0 | 0 | 0 | 2 | 1 | 14128.0151 | 0.0017  |
| 1 | 1 | 1 | 0 | 3 | 3 | 0 | 0 | 0 | 0 | 2 | 2 | 14128.0265 | 0.0012  |
| 1 | 1 | 1 | 0 | 2 | 1 | 0 | 0 | 0 | 0 | 2 | 1 | 14137.6909 | 0.0051  |
| 1 | 1 | 1 | 0 | 2 | 2 | 0 | 0 | 0 | 0 | 2 | 2 | 14137.6909 | -0.0002 |
| 2 | 1 | 2 | 0 | 3 | 2 | 1 | 1 | 1 | 0 | 2 | 1 | 15433.2062 | 0.0002  |
| 2 | 1 | 2 | 0 | 3 | 3 | 1 | 1 | 1 | 0 | 2 | 2 | 15433.2142 | 0.0010  |
| 2 | 1 | 2 | 0 | 2 | 1 | 1 | 1 | 1 | 0 | 2 | 1 | 15439.3399 | 0.0033  |
| 2 | 1 | 2 | 0 | 2 | 2 | 1 | 1 | 1 | 0 | 2 | 2 | 15439.3399 | -0.0020 |
| 2 | 1 | 2 | 0 | 3 | 2 | 1 | 1 | 1 | 0 | 3 | 2 | 15442.8781 | -0.0002 |
| 2 | 1 | 2 | 0 | 3 | 3 | 1 | 1 | 1 | 0 | 3 | 3 | 15442.8781 | -0.0009 |
| 2 | 1 | 2 | 0 | 1 | 0 | 1 | 1 | 1 | 0 | 2 | 1 | 15447.9109 | -0.0032 |
| 2 | 1 | 2 | 0 | 1 | 1 | 1 | 1 | 1 | 0 | 2 | 2 | 15447.9177 | -0.0044 |
| 2 | 1 | 2 | 0 | 2 | 2 | 1 | 1 | 1 | 0 | 3 | 3 | 15449.0046 | -0.0031 |
| 2 | 1 | 2 | 0 | 2 | 1 | 1 | 1 | 1 | 0 | 3 | 2 | 15449.0046 | -0.0044 |
| 2 | 1 | 2 | 0 | 4 | 3 | 1 | 1 | 1 | 0 | 3 | 2 | 15451.4425 | 0.0041  |
| 2 | 1 | 2 | 0 | 4 | 4 | 1 | 1 | 1 | 0 | 3 | 3 | 15451.4463 | 0.0046  |
| 2 | 1 | 2 | 0 | 2 | 1 | 1 | 1 | 1 | 0 | 1 | 0 | 15456.7339 | 0.0010  |
| 2 | 1 | 2 | 0 | 2 | 1 | 1 | 1 | 1 | 0 | 1 | 1 | 15456.7424 | 0.0028  |
| 2 | 1 | 2 | 0 | 2 | 2 | 1 | 1 | 1 | 0 | 1 | 1 | 15456.7506 | 0.0004  |
| 2 | 1 | 2 | 0 | 1 | 0 | 1 | 1 | 1 | 0 | 1 | 1 | 15465.3162 | -0.0009 |
| 2 | 1 | 2 | 0 | 1 | 1 | 1 | 1 | 1 | 0 | 1 | 0 | 15465.3221 | -0.0016 |
| 2 | 1 | 2 | 0 | 1 | 1 | 1 | 1 | 1 | 0 | 1 | 1 | 15465.3289 | -0.0014 |
| 4 | 2 | 2 | 0 | 4 | 3 | 4 | 1 | 3 | 0 | 3 | 2 | 15821.4454 | 0.0041  |
| 4 | 2 | 2 | 0 | 4 | 4 | 4 | 1 | 3 | 0 | 3 | 3 | 15821.4493 | 0.0045  |
| 4 | 2 | 2 | 0 | 5 | 4 | 4 | 1 | 3 | 0 | 6 | 5 | 15823.7015 | -0.0075 |
| 4 | 2 | 2 | 0 | 5 | 5 | 4 | 1 | 3 | 0 | 6 | 6 | 15823.7015 | -0.0111 |
| 4 | 2 | 2 | 0 | 3 | 2 | 4 | 1 | 3 | 0 | 3 | 2 | 15830.4428 | 0.0003  |
| 4 | 2 | 2 | 0 | 3 | 3 | 4 | 1 | 3 | 0 | 3 | 3 | 15830.4487 | 0.0010  |
| 4 | 2 | 2 | 0 | 6 | 5 | 4 | 1 | 3 | 0 | 6 | 5 | 15832.6968 | -0.0006 |
| 4 | 2 | 2 | 0 | 6 | 6 | 4 | 1 | 3 | 0 | 6 | 6 | 15832.7021 | -0.0006 |
| 4 | 2 | 2 | 0 | 5 | 4 | 4 | 1 | 3 | 0 | 4 | 3 | 15833.7333 | 0.0061  |
| 4 | 2 | 2 | 0 | 5 | 5 | 4 | 1 | 3 | 0 | 4 | 4 | 15833.7393 | 0.0065  |
| 4 | 2 | 2 | 0 | 4 | 3 | 4 | 1 | 3 | 0 | 4 | 3 | 15836.8788 | -0.0002 |
| 4 | 2 | 2 | 0 | 4 | 4 | 4 | 1 | 3 | 0 | 4 | 4 | 15836.8843 | 0.0003  |

Table S1: Observed Transition Frequencies (in MHz) for CH<sub>2</sub>C<sup>35</sup>ClF

|   |   |   |   |   |   |   |   |   |   |   |   |            |         |
|---|---|---|---|---|---|---|---|---|---|---|---|------------|---------|
| 4 | 2 | 2 | 0 | 5 | 4 | 4 | 1 | 3 | 0 | 5 | 4 | 15839.1429 | -0.0005 |
| 4 | 2 | 2 | 0 | 5 | 5 | 4 | 1 | 3 | 0 | 5 | 5 | 15839.1483 | -0.0002 |
| 4 | 2 | 2 | 0 | 4 | 3 | 4 | 1 | 3 | 0 | 5 | 4 | 15842.2885 | -0.0067 |
| 4 | 2 | 2 | 0 | 4 | 4 | 4 | 1 | 3 | 0 | 5 | 5 | 15842.2927 | -0.0069 |
| 4 | 2 | 2 | 0 | 3 | 2 | 4 | 1 | 3 | 0 | 4 | 3 | 15845.8764 | -0.0038 |
| 4 | 2 | 2 | 0 | 3 | 3 | 4 | 1 | 3 | 0 | 4 | 4 | 15845.8833 | -0.0037 |
| 4 | 2 | 2 | 0 | 6 | 5 | 4 | 1 | 3 | 0 | 5 | 4 | 15848.1407 | 0.0089  |
| 4 | 2 | 2 | 0 | 6 | 6 | 4 | 1 | 3 | 0 | 5 | 5 | 15848.1476 | 0.0090  |
| 3 | 2 | 1 | 0 | 3 | 2 | 3 | 1 | 2 | 0 | 2 | 1 | 15978.3919 | 0.0028  |
| 3 | 2 | 1 | 0 | 3 | 3 | 3 | 1 | 2 | 0 | 2 | 2 | 15978.3966 | 0.0034  |
| 3 | 2 | 1 | 0 | 2 | 1 | 3 | 1 | 2 | 0 | 2 | 1 | 15979.6809 | -0.0001 |
| 3 | 2 | 1 | 0 | 2 | 2 | 3 | 1 | 2 | 0 | 2 | 2 | 15979.6884 | 0.0009  |
| 3 | 2 | 1 | 0 | 4 | 3 | 3 | 1 | 2 | 0 | 5 | 4 | 15984.3384 | -0.0072 |
| 3 | 2 | 1 | 0 | 4 | 4 | 3 | 1 | 2 | 0 | 5 | 5 | 15984.3416 | -0.0083 |
| 3 | 2 | 1 | 0 | 5 | 4 | 3 | 1 | 2 | 0 | 5 | 4 | 15985.6118 | -0.0013 |
| 3 | 2 | 1 | 0 | 5 | 5 | 3 | 1 | 2 | 0 | 5 | 5 | 15985.6184 | -0.0014 |
| 3 | 2 | 1 | 0 | 4 | 3 | 3 | 1 | 2 | 0 | 3 | 2 | 15991.8123 | 0.0047  |
| 3 | 2 | 1 | 0 | 4 | 4 | 3 | 1 | 2 | 0 | 3 | 3 | 15991.8198 | 0.0050  |
| 3 | 2 | 1 | 0 | 3 | 2 | 3 | 1 | 2 | 0 | 3 | 2 | 15992.3971 | -0.0001 |
| 3 | 2 | 1 | 0 | 3 | 3 | 3 | 1 | 2 | 0 | 3 | 3 | 15992.4040 | 0.0007  |
| 3 | 2 | 1 | 0 | 2 | 1 | 3 | 1 | 2 | 0 | 3 | 2 | 15993.6869 | -0.0021 |
| 3 | 2 | 1 | 0 | 2 | 2 | 3 | 1 | 2 | 0 | 3 | 3 | 15993.6956 | -0.0020 |
| 3 | 2 | 1 | 0 | 4 | 3 | 3 | 1 | 2 | 0 | 4 | 3 | 15998.3459 | -0.0005 |
| 3 | 2 | 1 | 0 | 4 | 4 | 3 | 1 | 2 | 0 | 4 | 4 | 15998.3524 | -0.0002 |
| 3 | 2 | 1 | 0 | 3 | 2 | 3 | 1 | 2 | 0 | 4 | 3 | 15998.9314 | -0.0045 |
| 3 | 2 | 1 | 0 | 3 | 3 | 3 | 1 | 2 | 0 | 4 | 4 | 15998.9366 | -0.0045 |
| 3 | 2 | 1 | 0 | 5 | 4 | 3 | 1 | 2 | 0 | 4 | 3 | 15999.6201 | 0.0063  |
| 3 | 2 | 1 | 0 | 5 | 5 | 3 | 1 | 2 | 0 | 4 | 4 | 15999.6291 | 0.0065  |
| 4 | 1 | 3 | 0 | 5 | 4 | 4 | 1 | 4 | 0 | 6 | 5 | 16258.0045 | -0.0061 |
| 4 | 1 | 3 | 0 | 5 | 5 | 4 | 1 | 4 | 0 | 6 | 6 | 16258.0045 | -0.0104 |
| 4 | 1 | 3 | 0 | 4 | 3 | 4 | 1 | 4 | 0 | 3 | 2 | 16258.2982 | 0.0053  |
| 4 | 1 | 3 | 0 | 4 | 4 | 4 | 1 | 4 | 0 | 3 | 3 | 16258.2982 | 0.0011  |
| 4 | 1 | 3 | 0 | 5 | 4 | 4 | 1 | 4 | 0 | 4 | 3 | 16267.4968 | 0.0055  |
| 4 | 1 | 3 | 0 | 5 | 5 | 4 | 1 | 4 | 0 | 4 | 4 | 16267.5027 | 0.0055  |
| 4 | 1 | 3 | 0 | 5 | 4 | 4 | 1 | 4 | 0 | 5 | 4 | 16272.6218 | 0.0014  |
| 4 | 1 | 3 | 0 | 5 | 5 | 4 | 1 | 4 | 0 | 5 | 5 | 16272.6245 | -0.0014 |
| 4 | 1 | 3 | 0 | 4 | 3 | 4 | 1 | 4 | 0 | 4 | 3 | 16272.9106 | 0.0031  |
| 4 | 1 | 3 | 0 | 4 | 4 | 4 | 1 | 4 | 0 | 4 | 4 | 16272.9106 | -0.0023 |
| 4 | 1 | 3 | 0 | 6 | 5 | 4 | 1 | 4 | 0 | 6 | 5 | 16273.4482 | 0.0032  |
| 4 | 1 | 3 | 0 | 6 | 6 | 4 | 1 | 4 | 0 | 6 | 6 | 16273.4515 | 0.0007  |
| 4 | 1 | 3 | 0 | 3 | 2 | 4 | 1 | 4 | 0 | 3 | 2 | 16273.7328 | 0.0022  |
| 4 | 1 | 3 | 0 | 3 | 3 | 4 | 1 | 4 | 0 | 3 | 3 | 16273.7328 | -0.0035 |
| 4 | 1 | 3 | 0 | 4 | 3 | 4 | 1 | 4 | 0 | 5 | 4 | 16278.0325 | -0.0041 |
| 4 | 1 | 3 | 0 | 4 | 4 | 4 | 1 | 4 | 0 | 5 | 5 | 16278.0325 | -0.0091 |

Table S1: Observed Transition Frequencies (in MHz) for CH<sub>2</sub>C<sup>35</sup>ClF

|   |   |   |   |    |   |   |   |   |   |    |   |            |         |
|---|---|---|---|----|---|---|---|---|---|----|---|------------|---------|
| 4 | 1 | 3 | 0 | 6  | 6 | 4 | 1 | 4 | 0 | 5  | 5 | 16288.0720 | 0.0102  |
| 4 | 1 | 3 | 0 | 3  | 2 | 4 | 1 | 4 | 0 | 4  | 3 | 16288.3469 | 0.0017  |
| 4 | 1 | 3 | 0 | 3  | 3 | 4 | 1 | 4 | 0 | 4  | 4 | 16288.3469 | -0.0052 |
| 2 | 0 | 2 | 0 | 2  | 1 | 1 | 0 | 1 | 0 | 1  | 0 | 16766.3553 | 0.0005  |
| 2 | 0 | 2 | 0 | 2  | 2 | 1 | 0 | 1 | 0 | 1  | 1 | 16766.3687 | 0.0012  |
| 2 | 0 | 2 | 0 | 3  | 2 | 1 | 0 | 1 | 0 | 3  | 2 | 16768.3297 | 0.0012  |
| 2 | 0 | 2 | 0 | 3  | 3 | 1 | 0 | 1 | 0 | 3  | 3 | 16768.3297 | -0.0025 |
| 2 | 0 | 2 | 0 | 2  | 1 | 1 | 0 | 1 | 0 | 3  | 2 | 16780.9594 | -0.0038 |
| 2 | 0 | 2 | 0 | 2  | 2 | 1 | 0 | 1 | 0 | 3  | 3 | 16780.9594 | -0.0059 |
| 2 | 0 | 2 | 0 | 1  | 0 | 1 | 0 | 1 | 0 | 1  | 1 | 16784.0066 | -0.0003 |
| 2 | 0 | 2 | 0 | 1  | 1 | 1 | 0 | 1 | 0 | 1  | 0 | 16784.0133 | -0.0009 |
| 2 | 0 | 2 | 0 | 1  | 1 | 1 | 0 | 1 | 0 | 1  | 1 | 16784.0171 | -0.0009 |
| 2 | 0 | 2 | 0 | 4  | 3 | 1 | 0 | 1 | 0 | 3  | 2 | 16785.9935 | 0.0033  |
| 2 | 0 | 2 | 0 | 4  | 4 | 1 | 0 | 1 | 0 | 3  | 3 | 16786.0005 | 0.0043  |
| 2 | 0 | 2 | 0 | 3  | 2 | 1 | 0 | 1 | 0 | 2  | 1 | 16786.5673 | 0.0032  |
| 2 | 0 | 2 | 0 | 3  | 3 | 1 | 0 | 1 | 0 | 2  | 2 | 16786.5752 | 0.0036  |
| 2 | 0 | 2 | 0 | 2  | 1 | 1 | 0 | 1 | 0 | 2  | 1 | 16799.1988 | 0.0001  |
| 2 | 0 | 2 | 0 | 2  | 2 | 1 | 0 | 1 | 0 | 2  | 2 | 16799.2045 | -0.0001 |
| 2 | 0 | 2 | 1 | 26 | 1 | 1 | 0 | 1 | 1 | 16 | 1 | 16816.8428 | -0.0002 |
| 2 | 0 | 2 | 1 | 26 | 1 | 1 | 0 | 1 | 1 | 10 | 2 | 16816.8457 | -0.0019 |
| 2 | 0 | 2 | 1 | 25 | 1 | 1 | 0 | 1 | 1 | 9  | 2 | 16816.8533 | 0.0012  |
| 2 | 0 | 2 | 1 | 23 | 1 | 1 | 0 | 1 | 1 | 7  | 2 | 16816.8533 | -0.0018 |
| 2 | 0 | 2 | 1 | 19 | 2 | 1 | 0 | 1 | 1 | 4  | 3 | 16816.8533 | -0.0026 |
| 2 | 2 | 0 | 0 | 1  | 0 | 2 | 1 | 1 | 0 | 1  | 1 | 17027.2988 | 0.0037  |
| 2 | 2 | 0 | 0 | 1  | 1 | 2 | 1 | 1 | 0 | 1  | 1 | 17027.3203 | 0.0006  |
| 2 | 2 | 0 | 0 | 1  | 1 | 2 | 1 | 1 | 0 | 1  | 0 | 17027.3345 | -0.0012 |
| 2 | 2 | 0 | 0 | 1  | 0 | 2 | 1 | 1 | 0 | 2  | 1 | 17036.9855 | -0.0008 |
| 2 | 2 | 0 | 0 | 1  | 1 | 2 | 1 | 1 | 0 | 2  | 2 | 17036.9976 | -0.0006 |
| 2 | 2 | 0 | 0 | 2  | 1 | 2 | 1 | 1 | 0 | 1  | 0 | 17044.9700 | 0.0017  |
| 2 | 2 | 0 | 0 | 2  | 2 | 2 | 1 | 1 | 0 | 1  | 1 | 17044.9745 | 0.0025  |
| 2 | 2 | 0 | 1 | 12 | 2 | 2 | 1 | 1 | 1 | 12 | 2 | 17046.8412 | -0.0014 |
| 2 | 2 | 0 | 1 | 3  | 4 | 2 | 1 | 1 | 1 | 3  | 4 | 17046.8443 | -0.0004 |
| 2 | 2 | 0 | 1 | 6  | 3 | 2 | 1 | 1 | 1 | 6  | 3 | 17046.8443 | -0.0019 |
| 2 | 2 | 0 | 1 | 0  | 5 | 2 | 1 | 1 | 1 | 0  | 5 | 17046.8532 | -0.0012 |
| 2 | 2 | 0 | 1 | 1  | 4 | 2 | 1 | 1 | 1 | 1  | 4 | 17046.8532 | -0.0029 |
| 2 | 2 | 0 | 0 | 2  | 1 | 2 | 1 | 1 | 0 | 2  | 1 | 17054.6433 | -0.0003 |
| 2 | 2 | 0 | 0 | 2  | 2 | 2 | 1 | 1 | 0 | 2  | 2 | 17054.6519 | 0.0015  |
| 2 | 2 | 0 | 0 | 4  | 3 | 2 | 1 | 1 | 0 | 3  | 2 | 17056.5083 | 0.0037  |
| 2 | 2 | 0 | 0 | 4  | 4 | 2 | 1 | 1 | 0 | 3  | 3 | 17056.5204 | 0.0027  |
| 2 | 2 | 0 | 0 | 2  | 1 | 2 | 1 | 1 | 0 | 3  | 2 | 17061.5484 | -0.0029 |
| 2 | 2 | 0 | 0 | 2  | 2 | 2 | 1 | 1 | 0 | 3  | 3 | 17061.5542 | -0.0017 |
| 2 | 2 | 0 | 0 | 3  | 2 | 2 | 1 | 1 | 0 | 4  | 3 | 17064.5125 | -0.0055 |
| 2 | 2 | 0 | 0 | 3  | 3 | 2 | 1 | 1 | 0 | 4  | 4 | 17064.5179 | -0.0051 |
| 2 | 2 | 0 | 0 | 3  | 2 | 2 | 1 | 1 | 0 | 2  | 1 | 17067.2724 | 0.0037  |

Table S1: Observed Transition Frequencies (in MHz) for CH<sub>2</sub>C<sup>35</sup>ClF

|   |   |   |   |   |   |   |   |   |   |   |   |            |         |
|---|---|---|---|---|---|---|---|---|---|---|---|------------|---------|
| 2 | 2 | 0 | 0 | 3 | 3 | 2 | 1 | 1 | 0 | 2 | 2 | 17067.2828 | 0.0037  |
| 2 | 2 | 0 | 0 | 3 | 2 | 2 | 1 | 1 | 0 | 3 | 2 | 17074.1764 | 0.0000  |
| 2 | 2 | 0 | 0 | 3 | 3 | 2 | 1 | 1 | 0 | 3 | 3 | 17074.1854 | 0.0008  |
| 5 | 2 | 3 | 0 | 5 | 4 | 5 | 1 | 4 | 0 | 4 | 3 | 17156.6741 | 0.0081  |
| 5 | 2 | 3 | 0 | 5 | 5 | 5 | 1 | 4 | 0 | 4 | 4 | 17156.6741 | 0.0046  |
| 5 | 2 | 3 | 0 | 6 | 5 | 5 | 1 | 4 | 0 | 7 | 6 | 17157.5635 | -0.0096 |
| 5 | 2 | 3 | 0 | 6 | 6 | 5 | 1 | 4 | 0 | 7 | 7 | 17157.5635 | -0.0131 |
| 5 | 2 | 3 | 0 | 6 | 5 | 5 | 1 | 4 | 0 | 5 | 4 | 17168.9018 | 0.0078  |
| 5 | 2 | 3 | 0 | 6 | 6 | 5 | 1 | 4 | 0 | 5 | 5 | 17168.9068 | 0.0078  |
| 5 | 2 | 3 | 0 | 4 | 3 | 5 | 1 | 4 | 0 | 4 | 3 | 17169.3647 | 0.0001  |
| 5 | 2 | 3 | 0 | 4 | 4 | 5 | 1 | 4 | 0 | 4 | 4 | 17169.3693 | -0.0001 |
| 5 | 2 | 3 | 0 | 7 | 6 | 5 | 1 | 4 | 0 | 7 | 6 | 17170.2652 | 0.0002  |
| 5 | 2 | 3 | 0 | 7 | 7 | 5 | 1 | 4 | 0 | 7 | 7 | 17170.2694 | -0.0005 |
| 5 | 2 | 3 | 0 | 5 | 4 | 5 | 1 | 4 | 0 | 5 | 4 | 17172.4748 | -0.0003 |
| 5 | 2 | 3 | 0 | 5 | 5 | 5 | 1 | 4 | 0 | 5 | 5 | 17172.4791 | -0.0006 |
| 5 | 2 | 3 | 0 | 6 | 5 | 5 | 1 | 4 | 0 | 6 | 5 | 17173.3282 | -0.0005 |
| 5 | 2 | 3 | 0 | 6 | 6 | 5 | 1 | 4 | 0 | 6 | 6 | 17173.3324 | -0.0010 |
| 5 | 2 | 3 | 0 | 5 | 4 | 5 | 1 | 4 | 0 | 6 | 5 | 17176.9008 | -0.0089 |
| 5 | 2 | 3 | 0 | 5 | 5 | 5 | 1 | 4 | 0 | 6 | 6 | 17176.9043 | -0.0097 |
| 5 | 2 | 3 | 0 | 4 | 3 | 5 | 1 | 4 | 0 | 5 | 4 | 17185.1674 | -0.0063 |
| 5 | 2 | 3 | 0 | 4 | 4 | 5 | 1 | 4 | 0 | 5 | 5 | 17185.1741 | -0.0055 |
| 5 | 2 | 3 | 0 | 7 | 6 | 5 | 1 | 4 | 0 | 6 | 5 | 17186.0308 | 0.0102  |
| 5 | 2 | 3 | 0 | 7 | 7 | 5 | 1 | 4 | 0 | 6 | 6 | 17186.0376 | 0.0110  |
| 5 | 2 | 3 | 0 | 6 | 6 | 4 | 3 | 2 | 0 | 5 | 5 | 17575.5523 | 0.0048  |
| 5 | 2 | 3 | 0 | 6 | 5 | 4 | 3 | 2 | 0 | 5 | 4 | 17575.5523 | 0.0014  |
| 5 | 2 | 3 | 0 | 5 | 5 | 4 | 3 | 2 | 0 | 5 | 5 | 17579.1245 | -0.0036 |
| 5 | 2 | 3 | 0 | 5 | 4 | 4 | 3 | 2 | 0 | 5 | 4 | 17579.1245 | -0.0074 |
| 5 | 2 | 3 | 0 | 5 | 5 | 4 | 3 | 2 | 0 | 4 | 4 | 17581.2861 | 0.0022  |
| 5 | 2 | 3 | 0 | 5 | 4 | 4 | 3 | 2 | 0 | 4 | 3 | 17581.2861 | -0.0008 |
| 5 | 2 | 3 | 0 | 4 | 4 | 4 | 3 | 2 | 0 | 4 | 4 | 17593.9799 | -0.0039 |
| 5 | 2 | 3 | 0 | 4 | 3 | 4 | 3 | 2 | 0 | 4 | 3 | 17593.9799 | -0.0056 |
| 5 | 2 | 3 | 0 | 7 | 7 | 4 | 3 | 2 | 0 | 6 | 6 | 17594.3182 | 0.0099  |
| 5 | 2 | 3 | 0 | 7 | 6 | 4 | 3 | 2 | 0 | 6 | 5 | 17594.3182 | 0.0055  |
| 5 | 2 | 3 | 0 | 4 | 4 | 4 | 3 | 2 | 0 | 3 | 3 | 17599.9808 | 0.0015  |
| 5 | 2 | 3 | 0 | 4 | 3 | 4 | 3 | 2 | 0 | 3 | 2 | 17599.9808 | -0.0025 |
| 4 | 1 | 3 | 0 | 4 | 3 | 4 | 0 | 4 | 0 | 3 | 2 | 17836.7332 | 0.0056  |
| 4 | 1 | 3 | 0 | 4 | 4 | 4 | 0 | 4 | 0 | 3 | 3 | 17836.7332 | 0.0009  |
| 4 | 1 | 3 | 0 | 5 | 4 | 4 | 0 | 4 | 0 | 6 | 5 | 17837.0682 | -0.0066 |
| 4 | 1 | 3 | 0 | 5 | 5 | 4 | 0 | 4 | 0 | 6 | 6 | 17837.0682 | -0.0113 |
| 4 | 1 | 3 | 0 | 5 | 4 | 4 | 0 | 4 | 0 | 4 | 3 | 17847.7192 | 0.0054  |
| 4 | 1 | 3 | 0 | 5 | 5 | 4 | 0 | 4 | 0 | 4 | 4 | 17847.7257 | 0.0055  |
| 4 | 1 | 3 | 0 | 3 | 2 | 4 | 0 | 4 | 0 | 3 | 2 | 17852.1651 | -0.0002 |
| 4 | 1 | 3 | 0 | 3 | 3 | 4 | 0 | 4 | 0 | 3 | 3 | 17852.1689 | -0.0026 |
| 4 | 1 | 3 | 1 | 3 | 6 | 4 | 0 | 4 | 1 | 3 | 6 | 17852.5043 | -0.0036 |

Table S1: Observed Transition Frequencies (in MHz) for CH<sub>2</sub>C<sup>35</sup>ClF

|   |   |   |   |   |   |   |   |   |   |   |   |            |         |
|---|---|---|---|---|---|---|---|---|---|---|---|------------|---------|
| 4 | 1 | 3 | 1 | 6 | 5 | 4 | 0 | 4 | 1 | 6 | 5 | 17852.5043 | -0.0049 |
| 4 | 1 | 3 | 1 | 0 | 7 | 4 | 0 | 4 | 1 | 0 | 7 | 17852.5117 | -0.0024 |
| 4 | 1 | 3 | 1 | 1 | 6 | 4 | 0 | 4 | 1 | 1 | 6 | 17852.5117 | -0.0037 |
| 4 | 1 | 3 | 1 | 2 | 6 | 4 | 0 | 4 | 1 | 2 | 6 | 17852.5154 | -0.0034 |
| 4 | 1 | 3 | 0 | 4 | 3 | 4 | 0 | 4 | 0 | 4 | 3 | 17853.1295 | -0.0005 |
| 4 | 1 | 3 | 0 | 4 | 4 | 4 | 0 | 4 | 0 | 4 | 4 | 17853.1342 | -0.0017 |
| 4 | 1 | 3 | 0 | 5 | 4 | 4 | 0 | 4 | 0 | 5 | 4 | 17853.4692 | 0.0007  |
| 4 | 1 | 3 | 0 | 5 | 5 | 4 | 0 | 4 | 0 | 5 | 5 | 17853.4727 | -0.0018 |
| 4 | 1 | 3 | 0 | 4 | 3 | 4 | 0 | 4 | 0 | 5 | 4 | 17858.8808 | -0.0039 |
| 4 | 1 | 3 | 0 | 4 | 4 | 4 | 0 | 4 | 0 | 5 | 5 | 17858.8808 | -0.0093 |
| 4 | 1 | 3 | 0 | 3 | 2 | 4 | 0 | 4 | 0 | 4 | 3 | 17868.5621 | -0.0057 |
| 4 | 1 | 3 | 0 | 3 | 3 | 4 | 0 | 4 | 0 | 4 | 4 | 17868.5694 | -0.0057 |
| 4 | 1 | 3 | 0 | 6 | 5 | 4 | 0 | 4 | 0 | 5 | 4 | 17868.9114 | 0.0085  |
| 4 | 1 | 3 | 0 | 6 | 6 | 4 | 0 | 4 | 0 | 5 | 5 | 17868.9193 | 0.0090  |
| 2 | 1 | 1 | 0 | 3 | 2 | 1 | 1 | 0 | 0 | 2 | 1 | 18740.9189 | 0.0025  |
| 2 | 1 | 1 | 0 | 3 | 3 | 1 | 1 | 0 | 0 | 2 | 2 | 18740.9271 | 0.0016  |
| 2 | 1 | 1 | 0 | 2 | 1 | 1 | 1 | 0 | 0 | 2 | 1 | 18747.8241 | -0.0001 |
| 2 | 1 | 1 | 0 | 2 | 2 | 1 | 1 | 0 | 0 | 2 | 2 | 18747.8291 | -0.0019 |
| 2 | 1 | 1 | 0 | 3 | 2 | 1 | 1 | 0 | 0 | 3 | 2 | 18749.4905 | 0.0001  |
| 2 | 1 | 1 | 0 | 3 | 3 | 1 | 1 | 0 | 0 | 3 | 3 | 18749.4905 | -0.0014 |
| 2 | 1 | 1 | 0 | 2 | 2 | 1 | 1 | 0 | 0 | 3 | 3 | 18756.3933 | -0.0041 |
| 2 | 1 | 1 | 0 | 2 | 1 | 1 | 1 | 0 | 0 | 3 | 2 | 18756.3933 | -0.0048 |
| 2 | 1 | 1 | 0 | 1 | 0 | 1 | 1 | 0 | 0 | 2 | 1 | 18757.4971 | -0.0023 |
| 2 | 1 | 1 | 0 | 1 | 1 | 1 | 1 | 0 | 0 | 2 | 2 | 18757.5059 | -0.0035 |
| 2 | 1 | 1 | 0 | 4 | 3 | 1 | 1 | 0 | 0 | 3 | 2 | 18759.1530 | 0.0042  |
| 2 | 1 | 1 | 0 | 4 | 4 | 1 | 1 | 0 | 0 | 3 | 3 | 18759.1589 | 0.0054  |
| 2 | 1 | 1 | 0 | 2 | 1 | 1 | 1 | 0 | 0 | 1 | 0 | 18763.2511 | 0.0023  |
| 2 | 1 | 1 | 0 | 2 | 1 | 1 | 1 | 0 | 0 | 1 | 1 | 18763.2567 | 0.0004  |
| 2 | 1 | 1 | 0 | 2 | 2 | 1 | 1 | 0 | 0 | 1 | 1 | 18763.2690 | -0.0001 |
| 2 | 1 | 1 | 0 | 1 | 0 | 1 | 1 | 0 | 0 | 1 | 1 | 18772.9308 | -0.0007 |
| 2 | 1 | 1 | 0 | 1 | 1 | 1 | 1 | 0 | 0 | 1 | 0 | 18772.9380 | -0.0020 |
| 2 | 1 | 1 | 0 | 1 | 1 | 1 | 1 | 0 | 0 | 1 | 1 | 18772.9461 | -0.0014 |
| 3 | 0 | 3 | 0 | 4 | 3 | 2 | 1 | 2 | 0 | 4 | 3 | 20200.0480 | 0.0003  |
| 3 | 0 | 3 | 0 | 4 | 4 | 2 | 1 | 2 | 0 | 4 | 4 | 20200.0480 | -0.0012 |
| 3 | 0 | 3 | 0 | 3 | 2 | 2 | 1 | 2 | 0 | 4 | 3 | 20207.9732 | -0.0045 |
| 3 | 0 | 3 | 0 | 3 | 3 | 2 | 1 | 2 | 0 | 4 | 4 | 20207.9732 | -0.0052 |
| 3 | 0 | 3 | 0 | 4 | 3 | 2 | 1 | 2 | 0 | 3 | 2 | 20208.6121 | 0.0043  |
| 3 | 0 | 3 | 0 | 4 | 4 | 2 | 1 | 2 | 0 | 3 | 3 | 20208.6166 | 0.0047  |
| 3 | 0 | 3 | 0 | 3 | 2 | 2 | 1 | 2 | 0 | 2 | 1 | 20210.4092 | 0.0021  |
| 3 | 0 | 3 | 0 | 3 | 3 | 2 | 1 | 2 | 0 | 2 | 2 | 20210.4153 | 0.0029  |
| 3 | 0 | 3 | 0 | 3 | 2 | 2 | 1 | 2 | 0 | 3 | 2 | 20216.5395 | 0.0018  |
| 3 | 0 | 3 | 0 | 3 | 3 | 2 | 1 | 2 | 0 | 3 | 3 | 20216.5395 | -0.0016 |
| 3 | 0 | 3 | 0 | 5 | 4 | 2 | 1 | 2 | 0 | 4 | 3 | 20217.0250 | 0.0086  |
| 3 | 0 | 3 | 0 | 5 | 5 | 2 | 1 | 2 | 0 | 4 | 4 | 20217.0250 | 0.0056  |

Table S1: Observed Transition Frequencies (in MHz) for CH<sub>2</sub>C<sup>35</sup>ClF

|   |   |   |   |    |   |   |   |   |   |    |   |            |         |
|---|---|---|---|----|---|---|---|---|---|----|---|------------|---------|
| 3 | 0 | 3 | 0 | 2  | 2 | 2 | 1 | 2 | 0 | 1  | 1 | 20218.7819 | 0.0010  |
| 3 | 0 | 3 | 0 | 2  | 1 | 2 | 1 | 2 | 0 | 2  | 1 | 20227.3526 | -0.0017 |
| 3 | 0 | 3 | 0 | 2  | 2 | 2 | 1 | 2 | 0 | 2  | 2 | 20227.3603 | -0.0008 |
| 3 | 0 | 3 | 0 | 2  | 1 | 2 | 1 | 2 | 0 | 3  | 2 | 20233.4811 | -0.0038 |
| 3 | 0 | 3 | 0 | 2  | 2 | 2 | 1 | 2 | 0 | 3  | 3 | 20233.4856 | -0.0042 |
| 2 | 1 | 2 | 0 | 2  | 1 | 1 | 0 | 1 | 0 | 1  | 0 | 21008.3073 | 0.0006  |
| 2 | 1 | 2 | 0 | 2  | 1 | 1 | 0 | 1 | 0 | 1  | 1 | 21008.3144 | 0.0039  |
| 2 | 1 | 2 | 0 | 2  | 2 | 1 | 0 | 1 | 0 | 1  | 1 | 21008.3221 | 0.0010  |
| 2 | 1 | 2 | 0 | 3  | 2 | 1 | 0 | 1 | 0 | 3  | 2 | 21016.7830 | -0.0015 |
| 2 | 1 | 2 | 0 | 3  | 3 | 1 | 0 | 1 | 0 | 3  | 3 | 21016.7879 | -0.0023 |
| 2 | 1 | 2 | 0 | 1  | 0 | 1 | 0 | 1 | 0 | 1  | 1 | 21016.8872 | -0.0008 |
| 2 | 1 | 2 | 0 | 1  | 1 | 1 | 0 | 1 | 0 | 1  | 1 | 21016.8999 | -0.0014 |
| 2 | 1 | 2 | 0 | 2  | 1 | 1 | 0 | 1 | 0 | 3  | 2 | 21022.9125 | -0.0026 |
| 2 | 1 | 2 | 0 | 2  | 2 | 1 | 0 | 1 | 0 | 3  | 3 | 21022.9125 | -0.0064 |
| 2 | 1 | 2 | 0 | 4  | 3 | 1 | 0 | 1 | 0 | 3  | 2 | 21025.3463 | 0.0018  |
| 2 | 1 | 2 | 0 | 4  | 4 | 1 | 0 | 1 | 0 | 3  | 3 | 21025.3553 | 0.0024  |
| 2 | 1 | 2 | 0 | 3  | 2 | 1 | 0 | 1 | 0 | 2  | 1 | 21035.0227 | 0.0027  |
| 2 | 1 | 2 | 0 | 3  | 3 | 1 | 0 | 1 | 0 | 2  | 2 | 21035.0328 | 0.0033  |
| 2 | 1 | 2 | 0 | 2  | 1 | 1 | 0 | 1 | 0 | 2  | 1 | 21041.1497 | -0.0010 |
| 2 | 1 | 2 | 0 | 2  | 2 | 1 | 0 | 1 | 0 | 2  | 2 | 21041.1580 | -0.0003 |
| 2 | 1 | 2 | 1 | 26 | 1 | 1 | 0 | 1 | 1 | 16 | 1 | 21049.7240 | -0.0002 |
| 2 | 1 | 2 | 1 | 26 | 1 | 1 | 0 | 1 | 1 | 10 | 2 | 21049.7266 | -0.0022 |
| 2 | 1 | 2 | 1 | 23 | 1 | 1 | 0 | 1 | 1 | 7  | 2 | 21049.7362 | -0.0022 |
| 2 | 1 | 2 | 1 | 19 | 2 | 1 | 0 | 1 | 1 | 4  | 3 | 21049.7362 | -0.0030 |
| 2 | 2 | 1 | 0 | 1  | 0 | 2 | 1 | 2 | 0 | 1  | 1 | 21672.9581 | 0.0036  |
| 2 | 2 | 1 | 0 | 1  | 1 | 2 | 1 | 2 | 0 | 1  | 1 | 21672.9792 | 0.0003  |
| 2 | 2 | 1 | 0 | 1  | 1 | 2 | 1 | 2 | 0 | 1  | 0 | 21672.9915 | -0.0007 |
| 2 | 2 | 1 | 0 | 1  | 0 | 2 | 1 | 2 | 0 | 2  | 1 | 21681.5428 | -0.0024 |
| 2 | 2 | 1 | 0 | 1  | 1 | 2 | 1 | 2 | 0 | 2  | 2 | 21681.5576 | -0.0014 |
| 2 | 2 | 1 | 0 | 1  | 1 | 2 | 1 | 2 | 0 | 2  | 1 | 21681.5657 | -0.0040 |
| 2 | 2 | 1 | 0 | 2  | 1 | 2 | 1 | 2 | 0 | 1  | 0 | 21691.2183 | 0.0000  |
| 2 | 2 | 1 | 0 | 2  | 2 | 2 | 1 | 2 | 0 | 1  | 1 | 21691.2261 | 0.0016  |
| 2 | 2 | 1 | 1 | 3  | 4 | 2 | 1 | 2 | 1 | 3  | 4 | 21692.1448 | -0.0003 |
| 2 | 2 | 1 | 1 | 6  | 3 | 2 | 1 | 2 | 1 | 6  | 3 | 21692.1448 | -0.0027 |
| 2 | 2 | 1 | 1 | 0  | 5 | 2 | 1 | 2 | 1 | 0  | 5 | 21692.1577 | 0.0001  |
| 2 | 2 | 1 | 1 | 1  | 4 | 2 | 1 | 2 | 1 | 1  | 4 | 21692.1577 | -0.0026 |
| 2 | 2 | 1 | 1 | 2  | 4 | 2 | 1 | 2 | 1 | 2  | 4 | 21692.1681 | 0.0004  |
| 2 | 2 | 1 | 0 | 2  | 1 | 2 | 1 | 2 | 0 | 2  | 1 | 21699.7942 | -0.0016 |
| 2 | 2 | 1 | 0 | 2  | 2 | 2 | 1 | 2 | 0 | 2  | 2 | 21699.8045 | -0.0002 |
| 2 | 2 | 1 | 0 | 4  | 3 | 2 | 1 | 2 | 0 | 3  | 2 | 21700.7101 | 0.0025  |
| 2 | 2 | 1 | 0 | 4  | 4 | 2 | 1 | 2 | 0 | 3  | 3 | 21700.7256 | 0.0026  |
| 2 | 2 | 1 | 0 | 2  | 1 | 2 | 1 | 2 | 0 | 3  | 2 | 21705.9221 | -0.0043 |
| 2 | 2 | 1 | 0 | 2  | 2 | 2 | 1 | 2 | 0 | 3  | 3 | 21705.9304 | -0.0030 |
| 2 | 2 | 1 | 0 | 3  | 2 | 2 | 1 | 2 | 0 | 4  | 3 | 21710.3882 | -0.0045 |

Table S1: Observed Transition Frequencies (in MHz) for CH<sub>2</sub>C<sup>35</sup>ClF

|   |   |   |   |   |   |   |   |   |   |   |   |            |         |
|---|---|---|---|---|---|---|---|---|---|---|---|------------|---------|
| 2 | 2 | 1 | 0 | 3 | 3 | 2 | 1 | 2 | 0 | 4 | 4 | 21710.3964 | -0.0042 |
| 2 | 2 | 1 | 0 | 3 | 2 | 2 | 1 | 2 | 0 | 2 | 1 | 21712.8249 | 0.0027  |
| 2 | 2 | 1 | 0 | 3 | 3 | 2 | 1 | 2 | 0 | 2 | 2 | 21712.8377 | 0.0031  |
| 2 | 2 | 1 | 0 | 3 | 2 | 2 | 1 | 2 | 0 | 3 | 2 | 21718.9520 | -0.0008 |
| 2 | 2 | 1 | 0 | 3 | 3 | 2 | 1 | 2 | 0 | 3 | 3 | 21718.9631 | -0.0002 |

Table S2: Observed Transition Frequencies (in MHz) for CH<sub>2</sub><sup>13</sup>C<sup>35</sup>ClF

| $J'$ | $K_a'$ | $K_c'$ | $s'$ | $m_1'$ | $m_2'$ | $J''$ | $K_a''$ | $K_c''$ | $s''$ | $m_1''$ | $m_2''$ | Observed   | Obs - Calc |
|------|--------|--------|------|--------|--------|-------|---------|---------|-------|---------|---------|------------|------------|
| 1    | 1      | 0      | 0    | 1      | 1      | 1     | 0       | 1       | 0     | 1       | 0       | 7209.5926  | -0.0003    |
| 1    | 1      | 0      | 0    | 1      | 1      | 1     | 0       | 1       | 0     | 1       | 1       | 7209.5968  | 0.0001     |
| 1    | 1      | 0      | 0    | 1      | 0      | 1     | 0       | 1       | 0     | 1       | 1       | 7209.6061  | 0.0006     |
| 1    | 1      | 0      | 0    | 2      | 2      | 1     | 0       | 1       | 0     | 1       | 1       | 7225.0419  | 0.0042     |
| 1    | 1      | 0      | 0    | 3      | 2      | 1     | 0       | 1       | 0     | 3       | 2       | 7231.0626  | -0.0022    |
| 1    | 1      | 0      | 0    | 3      | 3      | 1     | 0       | 1       | 0     | 3       | 3       | 7231.0697  | -0.0039    |
| 1    | 1      | 0      | 0    | 2      | 2      | 1     | 0       | 1       | 0     | 3       | 3       | 7239.6361  | -0.0046    |
| 1    | 1      | 0      | 0    | 2      | 1      | 1     | 0       | 1       | 0     | 3       | 2       | 7239.6361  | -0.0045    |
| 1    | 1      | 0      | 0    | 1      | 1      | 1     | 0       | 1       | 0     | 2       | 2       | 7242.4442  | -0.0014    |
| 1    | 1      | 0      | 0    | 3      | 2      | 1     | 0       | 1       | 0     | 2       | 1       | 7249.3150  | 0.0082     |
| 1    | 1      | 0      | 0    | 3      | 3      | 1     | 0       | 1       | 0     | 2       | 2       | 7249.3219  | 0.0025     |
| 1    | 1      | 0      | 0    | 2      | 1      | 1     | 0       | 1       | 0     | 2       | 1       | 7257.8822  | -0.0005    |
| 1    | 1      | 0      | 0    | 2      | 2      | 1     | 0       | 1       | 0     | 2       | 2       | 7257.8877  | 0.0012     |
| 1    | 0      | 1      | 0    | 2      | 1      | 0     | 0       | 0       | 0     | 2       | 1       | 8519.1128  | 0.0016     |
| 1    | 0      | 1      | 0    | 2      | 2      | 0     | 0       | 0       | 0     | 2       | 2       | 8519.1128  | -0.0015    |
| 1    | 0      | 1      | 0    | 3      | 3      | 0     | 0       | 0       | 0     | 2       | 2       | 8537.3641  | 0.0040     |
| 1    | 0      | 1      | 0    | 1      | 1      | 0     | 0       | 0       | 0     | 2       | 2       | 8551.9614  | -0.0017    |
| 2    | 1      | 1      | 0    | 2      | 2      | 2     | 0       | 2       | 0     | 1       | 1       | 9180.4023  | 0.0014     |
| 2    | 1      | 1      | 0    | 3      | 2      | 2     | 0       | 2       | 0     | 4       | 3       | 9186.1111  | -0.0040    |
| 2    | 1      | 1      | 0    | 3      | 3      | 2     | 0       | 2       | 0     | 4       | 4       | 9186.1111  | -0.0076    |
| 2    | 1      | 1      | 0    | 1      | 1      | 2     | 0       | 2       | 0     | 1       | 1       | 9190.0841  | -0.0005    |
| 2    | 1      | 1      | 0    | 1      | 1      | 2     | 0       | 2       | 0     | 1       | 0       | 9190.0964  | 0.0005     |
| 2    | 1      | 1      | 0    | 3      | 3      | 2     | 0       | 2       | 0     | 2       | 2       | 9191.1553  | 0.0027     |
| 2    | 1      | 1      | 0    | 4      | 3      | 2     | 0       | 2       | 0     | 4       | 3       | 9195.7765  | -0.0021    |
| 2    | 1      | 1      | 0    | 4      | 4      | 2     | 0       | 2       | 0     | 4       | 4       | 9195.7837  | -0.0021    |
| 2    | 1      | 1      | 0    | 3      | 2      | 2     | 0       | 2       | 0     | 3       | 2       | 9203.7919  | 0.0048     |
| 2    | 1      | 1      | 0    | 3      | 3      | 2     | 0       | 2       | 0     | 3       | 3       | 9203.7919  | -0.0011    |
| 2    | 1      | 1      | 0    | 1      | 0      | 2     | 0       | 2       | 0     | 2       | 1       | 9207.7344  | -0.0024    |
| 2    | 1      | 1      | 0    | 1      | 1      | 2     | 0       | 2       | 0     | 2       | 2       | 9207.7428  | -0.0025    |
| 2    | 1      | 1      | 0    | 2      | 1      | 2     | 0       | 2       | 0     | 3       | 2       | 9210.6971  | -0.0016    |
| 2    | 1      | 1      | 0    | 2      | 2      | 2     | 0       | 2       | 0     | 3       | 3       | 9210.6971  | -0.0050    |
| 2    | 1      | 1      | 0    | 4      | 3      | 2     | 0       | 2       | 0     | 3       | 2       | 9213.4605  | 0.0099     |
| 2    | 1      | 1      | 0    | 4      | 4      | 2     | 0       | 2       | 0     | 3       | 3       | 9213.4647  | 0.0047     |
| 3    | 1      | 2      | 0    | 4      | 3      | 3     | 1       | 3       | 0     | 4       | 3       | 9848.4289  | 0.0027     |
| 3    | 1      | 2      | 0    | 4      | 4      | 3     | 1       | 3       | 0     | 4       | 4       | 9848.4289  | -0.0026    |
| 3    | 1      | 2      | 0    | 3      | 2      | 3     | 1       | 3       | 0     | 3       | 2       | 9848.9089  | 0.0033     |
| 3    | 1      | 2      | 0    | 3      | 3      | 3     | 1       | 3       | 0     | 3       | 3       | 9848.9089  | -0.0017    |
| 3    | 1      | 2      | 0    | 5      | 4      | 3     | 1       | 3       | 0     | 5       | 4       | 9849.4570  | -0.0034    |
| 3    | 1      | 2      | 0    | 5      | 5      | 3     | 1       | 3       | 0     | 5       | 5       | 9849.4686  | 0.0025     |
| 3    | 1      | 2      | 0    | 2      | 1      | 3     | 1       | 3       | 0     | 2       | 1       | 9849.9408  | 0.0024     |
| 3    | 1      | 2      | 0    | 2      | 2      | 3     | 1       | 3       | 0     | 2       | 2       | 9849.9408  | -0.0031    |
| 3    | 1      | 2      | 0    | 4      | 4      | 2     | 2       | 1       | 0     | 3       | 3       | 11066.2394 | 0.0036     |
| 3    | 1      | 2      | 0    | 4      | 3      | 2     | 2       | 1       | 0     | 3       | 2       | 11066.2394 | -0.0001    |

Table S2: Observed Transition Frequencies (in MHz) for CH<sub>2</sub><sup>13</sup>C<sup>35</sup>ClF

|   |   |   |   |   |   |   |   |   |   |   |   |            |         |
|---|---|---|---|---|---|---|---|---|---|---|---|------------|---------|
| 3 | 1 | 2 | 0 | 3 | 3 | 2 | 2 | 1 | 0 | 2 | 2 | 11085.8124 | -0.0006 |
| 3 | 1 | 2 | 0 | 3 | 2 | 2 | 2 | 1 | 0 | 2 | 1 | 11085.8124 | -0.0012 |
| 3 | 1 | 2 | 0 | 5 | 5 | 2 | 2 | 1 | 0 | 4 | 4 | 11098.4984 | 0.0046  |
| 3 | 1 | 2 | 0 | 5 | 4 | 2 | 2 | 1 | 0 | 4 | 3 | 11098.5067 | 0.0056  |
| 3 | 1 | 2 | 0 | 2 | 2 | 2 | 2 | 1 | 0 | 1 | 1 | 11118.0787 | -0.0048 |
| 2 | 0 | 2 | 0 | 3 | 2 | 1 | 1 | 1 | 0 | 2 | 1 | 11144.7097 | 0.0015  |
| 2 | 0 | 2 | 0 | 3 | 3 | 1 | 1 | 1 | 0 | 2 | 2 | 11144.7152 | 0.0024  |
| 2 | 0 | 2 | 0 | 3 | 3 | 1 | 1 | 1 | 0 | 3 | 3 | 11154.3827 | -0.0007 |
| 2 | 0 | 2 | 0 | 3 | 2 | 1 | 1 | 1 | 0 | 3 | 2 | 11154.3867 | 0.0003  |
| 2 | 0 | 2 | 0 | 2 | 1 | 1 | 1 | 1 | 0 | 2 | 1 | 11157.3521 | 0.0019  |
| 2 | 0 | 2 | 0 | 2 | 2 | 1 | 1 | 1 | 0 | 2 | 2 | 11157.3521 | -0.0011 |
| 2 | 0 | 2 | 0 | 2 | 2 | 1 | 1 | 1 | 0 | 3 | 3 | 11167.0193 | -0.0045 |
| 2 | 0 | 2 | 0 | 2 | 1 | 1 | 1 | 1 | 0 | 3 | 2 | 11167.0242 | -0.0042 |
| 2 | 0 | 2 | 0 | 4 | 4 | 1 | 1 | 1 | 0 | 3 | 3 | 11172.0646 | 0.0069  |
| 2 | 0 | 2 | 0 | 4 | 3 | 1 | 1 | 1 | 0 | 3 | 2 | 11172.0646 | 0.0062  |
| 2 | 0 | 2 | 0 | 2 | 1 | 1 | 1 | 1 | 0 | 1 | 0 | 11174.7553 | 0.0004  |
| 2 | 0 | 2 | 0 | 2 | 2 | 1 | 1 | 1 | 0 | 1 | 1 | 11174.7733 | 0.0018  |
| 2 | 0 | 2 | 0 | 1 | 0 | 1 | 1 | 1 | 0 | 2 | 1 | 11175.0048 | -0.0039 |
| 2 | 0 | 2 | 0 | 1 | 1 | 1 | 1 | 1 | 0 | 2 | 2 | 11175.0106 | -0.0034 |
| 2 | 0 | 2 | 0 | 1 | 0 | 1 | 1 | 1 | 0 | 1 | 1 | 11192.4204 | -0.0006 |
| 2 | 0 | 2 | 0 | 1 | 1 | 1 | 1 | 1 | 0 | 1 | 0 | 11192.4237 | -0.0010 |
| 2 | 0 | 2 | 0 | 1 | 1 | 1 | 1 | 1 | 0 | 1 | 1 | 11192.4315 | -0.0008 |
| 3 | 1 | 2 | 0 | 3 | 2 | 3 | 0 | 3 | 0 | 2 | 1 | 12621.3368 | 0.0058  |
| 3 | 1 | 2 | 0 | 3 | 3 | 3 | 0 | 3 | 0 | 2 | 2 | 12621.3368 | 0.0010  |
| 3 | 1 | 2 | 0 | 4 | 3 | 3 | 0 | 3 | 0 | 5 | 4 | 12622.6989 | -0.0046 |
| 3 | 1 | 2 | 0 | 4 | 4 | 3 | 0 | 3 | 0 | 5 | 5 | 12622.6989 | -0.0097 |
| 3 | 1 | 2 | 0 | 4 | 4 | 3 | 0 | 3 | 0 | 3 | 3 | 12631.7596 | 0.0030  |
| 3 | 1 | 2 | 0 | 2 | 1 | 3 | 0 | 3 | 0 | 2 | 1 | 12635.3522 | 0.0047  |
| 3 | 1 | 2 | 0 | 2 | 2 | 3 | 0 | 3 | 0 | 2 | 2 | 12635.3522 | -0.0023 |
| 3 | 1 | 2 | 0 | 5 | 4 | 3 | 0 | 3 | 0 | 5 | 4 | 12636.7177 | 0.0049  |
| 3 | 1 | 2 | 0 | 5 | 5 | 3 | 0 | 3 | 0 | 5 | 5 | 12636.7177 | -0.0024 |
| 3 | 1 | 2 | 0 | 3 | 2 | 3 | 0 | 3 | 0 | 3 | 2 | 12638.2956 | 0.0035  |
| 3 | 1 | 2 | 0 | 3 | 3 | 3 | 0 | 3 | 0 | 3 | 3 | 12638.2956 | -0.0028 |
| 3 | 1 | 2 | 0 | 4 | 4 | 3 | 0 | 3 | 0 | 4 | 4 | 12639.6893 | -0.0027 |
| 3 | 1 | 2 | 0 | 3 | 2 | 3 | 0 | 3 | 0 | 4 | 3 | 12646.2254 | -0.0028 |
| 3 | 1 | 2 | 0 | 3 | 3 | 3 | 0 | 3 | 0 | 4 | 4 | 12646.2254 | -0.0084 |
| 3 | 1 | 2 | 0 | 2 | 2 | 3 | 0 | 3 | 0 | 3 | 3 | 12652.3120 | -0.0052 |
| 3 | 1 | 2 | 0 | 5 | 5 | 3 | 0 | 3 | 0 | 4 | 4 | 12653.7088 | 0.0053  |
| 1 | 1 | 1 | 0 | 1 | 1 | 0 | 0 | 0 | 0 | 2 | 2 | 14112.5667 | -0.0018 |
| 1 | 1 | 1 | 0 | 1 | 0 | 0 | 0 | 0 | 0 | 2 | 1 | 14112.5724 | -0.0037 |
| 1 | 1 | 1 | 0 | 2 | 1 | 0 | 0 | 0 | 0 | 2 | 1 | 14129.9745 | -0.0063 |
| 1 | 1 | 1 | 0 | 2 | 2 | 0 | 0 | 0 | 0 | 2 | 2 | 14129.9858 | -0.0011 |
| 2 | 1 | 2 | 0 | 3 | 2 | 1 | 1 | 1 | 0 | 2 | 1 | 15405.6118 | -0.0008 |
| 2 | 1 | 2 | 0 | 3 | 3 | 1 | 1 | 1 | 0 | 2 | 2 | 15405.6216 | 0.0018  |

Table S2: Observed Transition Frequencies (in MHz) for CH<sub>2</sub><sup>13</sup>C<sup>35</sup>ClF

|   |   |   |   |   |   |   |   |   |   |   |   |            |         |
|---|---|---|---|---|---|---|---|---|---|---|---|------------|---------|
| 2 | 1 | 2 | 0 | 2 | 2 | 1 | 1 | 1 | 0 | 2 | 2 | 15411.7476 | -0.0018 |
| 2 | 1 | 2 | 0 | 3 | 3 | 1 | 1 | 1 | 0 | 3 | 3 | 15415.2900 | -0.0005 |
| 2 | 1 | 2 | 0 | 3 | 2 | 1 | 1 | 1 | 0 | 3 | 2 | 15415.2900 | -0.0008 |
| 2 | 1 | 2 | 0 | 1 | 1 | 1 | 1 | 1 | 0 | 2 | 2 | 15420.3272 | -0.0036 |
| 2 | 1 | 2 | 0 | 2 | 2 | 1 | 1 | 1 | 0 | 3 | 3 | 15421.4174 | -0.0026 |
| 2 | 1 | 2 | 0 | 2 | 1 | 1 | 1 | 1 | 0 | 3 | 2 | 15421.4174 | -0.0049 |
| 2 | 1 | 2 | 0 | 4 | 3 | 1 | 1 | 1 | 0 | 3 | 2 | 15423.8559 | 0.0039  |
| 2 | 1 | 2 | 0 | 4 | 4 | 1 | 1 | 1 | 0 | 3 | 3 | 15423.8588 | 0.0043  |
| 2 | 1 | 2 | 0 | 2 | 1 | 1 | 1 | 1 | 0 | 1 | 0 | 15429.1489 | 0.0001  |
| 2 | 1 | 2 | 0 | 2 | 2 | 1 | 1 | 1 | 0 | 1 | 1 | 15429.1685 | 0.0008  |
| 2 | 1 | 2 | 0 | 1 | 0 | 1 | 1 | 1 | 0 | 1 | 1 | 15437.7330 | -0.0019 |
| 2 | 1 | 2 | 0 | 1 | 1 | 1 | 1 | 1 | 0 | 1 | 1 | 15437.7478 | -0.0013 |
| 4 | 2 | 2 | 0 | 6 | 5 | 4 | 1 | 3 | 0 | 6 | 5 | 15844.8464 | 0.0025  |
| 4 | 2 | 2 | 0 | 6 | 6 | 4 | 1 | 3 | 0 | 6 | 6 | 15844.8464 | -0.0045 |
| 4 | 2 | 2 | 0 | 4 | 4 | 4 | 1 | 3 | 0 | 4 | 4 | 15849.0408 | -0.0017 |
| 4 | 2 | 2 | 0 | 5 | 4 | 4 | 1 | 3 | 0 | 5 | 4 | 15851.3074 | 0.0013  |
| 4 | 2 | 2 | 0 | 5 | 5 | 4 | 1 | 3 | 0 | 5 | 5 | 15851.3133 | 0.0006  |
| 3 | 2 | 1 | 0 | 2 | 1 | 3 | 1 | 2 | 0 | 2 | 1 | 16002.2939 | 0.0016  |
| 3 | 2 | 1 | 0 | 2 | 2 | 3 | 1 | 2 | 0 | 2 | 2 | 16002.3017 | 0.0008  |
| 3 | 2 | 1 | 0 | 5 | 4 | 3 | 1 | 2 | 0 | 5 | 4 | 16008.2311 | -0.0008 |
| 3 | 2 | 1 | 0 | 5 | 5 | 3 | 1 | 2 | 0 | 5 | 5 | 16008.2392 | -0.0015 |
| 3 | 2 | 1 | 0 | 3 | 2 | 3 | 1 | 2 | 0 | 3 | 2 | 16015.0245 | 0.0002  |
| 3 | 2 | 1 | 0 | 3 | 3 | 3 | 1 | 2 | 0 | 3 | 3 | 16015.0330 | 0.0006  |
| 3 | 2 | 1 | 0 | 4 | 3 | 3 | 1 | 2 | 0 | 4 | 3 | 16020.9805 | -0.0003 |
| 3 | 2 | 1 | 0 | 4 | 4 | 3 | 1 | 2 | 0 | 4 | 4 | 16020.9884 | -0.0007 |
| 2 | 0 | 2 | 0 | 2 | 1 | 1 | 0 | 1 | 0 | 1 | 0 | 16735.3644 | 0.0003  |
| 2 | 0 | 2 | 0 | 2 | 2 | 1 | 0 | 1 | 0 | 1 | 1 | 16735.3787 | 0.0017  |
| 2 | 0 | 2 | 0 | 3 | 2 | 1 | 0 | 1 | 0 | 3 | 2 | 16737.3372 | 0.0014  |
| 2 | 0 | 2 | 0 | 3 | 3 | 1 | 0 | 1 | 0 | 3 | 3 | 16737.3372 | -0.0023 |
| 2 | 0 | 2 | 0 | 2 | 1 | 1 | 0 | 1 | 0 | 3 | 2 | 16749.9736 | -0.0042 |
| 2 | 0 | 2 | 0 | 2 | 2 | 1 | 0 | 1 | 0 | 3 | 3 | 16749.9736 | -0.0063 |
| 2 | 0 | 2 | 0 | 1 | 0 | 1 | 0 | 1 | 0 | 1 | 1 | 16753.0260 | -0.0004 |
| 2 | 0 | 2 | 0 | 1 | 1 | 1 | 0 | 1 | 0 | 1 | 1 | 16753.0363 | -0.0014 |
| 2 | 0 | 2 | 0 | 4 | 3 | 1 | 0 | 1 | 0 | 3 | 2 | 16755.0112 | 0.0035  |
| 2 | 0 | 2 | 0 | 4 | 4 | 1 | 0 | 1 | 0 | 3 | 3 | 16755.0181 | 0.0044  |
| 2 | 0 | 2 | 0 | 3 | 2 | 1 | 0 | 1 | 0 | 2 | 1 | 16755.5829 | 0.0051  |
| 2 | 0 | 2 | 0 | 3 | 3 | 1 | 0 | 1 | 0 | 2 | 2 | 16755.5890 | 0.0036  |
| 2 | 2 | 0 | 0 | 1 | 0 | 2 | 1 | 1 | 0 | 1 | 1 | 17051.8960 | 0.0044  |
| 2 | 2 | 0 | 0 | 1 | 1 | 2 | 1 | 1 | 0 | 1 | 1 | 17051.9204 | -0.0001 |
| 2 | 2 | 0 | 0 | 2 | 2 | 2 | 1 | 1 | 0 | 1 | 1 | 17069.5833 | 0.0000  |
| 2 | 2 | 0 | 0 | 4 | 3 | 2 | 1 | 1 | 0 | 4 | 3 | 17071.4526 | -0.0031 |
| 2 | 2 | 0 | 0 | 4 | 4 | 2 | 1 | 1 | 0 | 4 | 4 | 17071.4683 | -0.0004 |
| 2 | 2 | 0 | 0 | 4 | 3 | 2 | 1 | 1 | 0 | 3 | 2 | 17081.1224 | 0.0031  |
| 2 | 2 | 0 | 0 | 4 | 4 | 2 | 1 | 1 | 0 | 3 | 3 | 17081.1395 | 0.0037  |

Table S2: Observed Transition Frequencies (in MHz) for CH<sub>2</sub><sup>13</sup>C<sup>35</sup>ClF

|   |   |   |   |   |   |   |   |   |   |   |   |            |         |
|---|---|---|---|---|---|---|---|---|---|---|---|------------|---------|
| 2 | 2 | 0 | 0 | 2 | 1 | 2 | 1 | 1 | 0 | 3 | 2 | 17086.1650 | -0.0045 |
| 2 | 2 | 0 | 0 | 2 | 2 | 2 | 1 | 1 | 0 | 3 | 3 | 17086.1730 | -0.0030 |
| 2 | 2 | 0 | 0 | 3 | 2 | 2 | 1 | 1 | 0 | 2 | 1 | 17091.8949 | 0.0047  |
| 2 | 2 | 0 | 0 | 3 | 3 | 2 | 1 | 1 | 0 | 2 | 2 | 17091.9071 | 0.0037  |
| 2 | 2 | 0 | 0 | 3 | 2 | 2 | 1 | 1 | 0 | 3 | 2 | 17098.8002 | -0.0016 |
| 2 | 2 | 0 | 0 | 3 | 3 | 2 | 1 | 1 | 0 | 3 | 3 | 17098.8125 | 0.0000  |
| 2 | 1 | 1 | 0 | 3 | 3 | 1 | 1 | 0 | 0 | 2 | 2 | 18701.4932 | 0.0014  |
| 2 | 1 | 1 | 0 | 2 | 2 | 1 | 1 | 0 | 0 | 2 | 2 | 18708.3983 | -0.0026 |
| 2 | 1 | 1 | 0 | 3 | 2 | 1 | 1 | 0 | 0 | 3 | 2 | 18710.0579 | -0.0002 |
| 2 | 1 | 1 | 0 | 3 | 3 | 1 | 1 | 0 | 0 | 3 | 3 | 18710.0579 | -0.0010 |
| 2 | 1 | 1 | 0 | 4 | 3 | 1 | 1 | 0 | 0 | 3 | 2 | 18719.7309 | 0.0093  |
| 2 | 1 | 1 | 0 | 4 | 4 | 1 | 1 | 0 | 0 | 3 | 3 | 18719.7309 | 0.0049  |
| 2 | 1 | 1 | 0 | 2 | 2 | 1 | 1 | 0 | 0 | 1 | 1 | 18723.8436 | 0.0017  |
| 2 | 1 | 1 | 0 | 1 | 1 | 1 | 1 | 0 | 0 | 1 | 1 | 18733.5256 | 0.0000  |
| 3 | 0 | 3 | 0 | 4 | 3 | 2 | 1 | 2 | 0 | 4 | 3 | 20146.3240 | -0.0040 |
| 3 | 0 | 3 | 0 | 4 | 4 | 2 | 1 | 2 | 0 | 4 | 4 | 20146.3240 | -0.0046 |
| 3 | 0 | 3 | 0 | 4 | 3 | 2 | 1 | 2 | 0 | 3 | 2 | 20154.8926 | 0.0035  |
| 3 | 0 | 3 | 0 | 4 | 4 | 2 | 1 | 2 | 0 | 3 | 3 | 20154.8926 | 0.0000  |
| 3 | 0 | 3 | 0 | 3 | 2 | 2 | 1 | 2 | 0 | 2 | 1 | 20156.6922 | -0.0015 |
| 3 | 0 | 3 | 0 | 3 | 3 | 2 | 1 | 2 | 0 | 2 | 2 | 20156.6979 | -0.0005 |
| 3 | 0 | 3 | 0 | 5 | 4 | 2 | 1 | 2 | 0 | 4 | 3 | 20163.3146 | 0.0048  |
| 3 | 0 | 3 | 0 | 5 | 5 | 2 | 1 | 2 | 0 | 4 | 4 | 20163.3146 | 0.0026  |
| 3 | 0 | 3 | 0 | 2 | 2 | 2 | 1 | 2 | 0 | 1 | 1 | 20165.0769 | -0.0029 |
| 3 | 0 | 3 | 0 | 2 | 2 | 2 | 1 | 2 | 0 | 2 | 2 | 20173.6566 | -0.0045 |
| 2 | 1 | 2 | 0 | 2 | 1 | 1 | 0 | 1 | 0 | 1 | 0 | 20989.7570 | -0.0010 |

Table S3: Observed Transition Frequencies (in MHz) for  $^{13}\text{CH}_2\text{C}^{35}\text{ClF}$ 

| $J'$ | $K_a'$ | $K_c'$ | $s'$ | $m_1'$ | $m_2'$ | $J''$ | $K_a''$ | $K_c''$ | $s''$ | $m_1''$ | $m_2''$ | Observed  | Obs - Calc |
|------|--------|--------|------|--------|--------|-------|---------|---------|-------|---------|---------|-----------|------------|
| 1    | 1      | 0      | 0    | 1      | 1      | 1     | 0       | 1       | 0     | 1       | 0       | 6950.6801 | -0.0012    |
| 1    | 1      | 0      | 0    | 1      | 1      | 1     | 0       | 1       | 0     | 1       | 1       | 6950.6845 | -0.0009    |
| 1    | 1      | 0      | 0    | 1      | 0      | 1     | 0       | 1       | 0     | 1       | 1       | 6950.6938 | -0.0002    |
| 1    | 1      | 0      | 0    | 2      | 1      | 1     | 0       | 1       | 0     | 1       | 0       | 6966.1128 | 0.0006     |
| 1    | 1      | 0      | 0    | 2      | 2      | 1     | 0       | 1       | 0     | 1       | 1       | 6966.1250 | 0.0019     |
| 1    | 1      | 0      | 1    | 3      | 3      | 1     | 0       | 1       | 1     | 3       | 3       | 6972.2003 | 0.0005     |
| 1    | 1      | 0      | 1    | 6      | 2      | 1     | 0       | 1       | 1     | 6       | 2       | 6972.2003 | -0.0008    |
| 1    | 1      | 0      | 1    | 0      | 4      | 1     | 0       | 1       | 1     | 0       | 4       | 6972.2064 | -0.0010    |
| 1    | 1      | 0      | 1    | 1      | 3      | 1     | 0       | 1       | 1     | 1       | 3       | 6972.2064 | -0.0028    |
| 1    | 1      | 0      | 0    | 2      | 2      | 1     | 0       | 1       | 0     | 3       | 3       | 6980.7705 | -0.0040    |
| 1    | 1      | 0      | 0    | 2      | 1      | 1     | 0       | 1       | 0     | 3       | 2       | 6980.7705 | -0.0044    |
| 1    | 1      | 0      | 0    | 1      | 1      | 1     | 0       | 1       | 0     | 2       | 2       | 6983.6425 | -0.0007    |
| 1    | 1      | 0      | 0    | 1      | 0      | 1     | 0       | 1       | 0     | 2       | 1       | 6983.6533 | -0.0017    |
| 1    | 1      | 0      | 1    | 8      | 2      | 1     | 0       | 1       | 1     | 16      | 1       | 6990.5075 | 0.0055     |
| 1    | 1      | 0      | 1    | 3      | 3      | 1     | 0       | 1       | 1     | 10      | 2       | 6990.5075 | 0.0042     |
| 1    | 1      | 0      | 1    | 6      | 2      | 1     | 0       | 1       | 1     | 14      | 1       | 6990.5075 | 0.0040     |
| 1    | 1      | 0      | 1    | 2      | 3      | 1     | 0       | 1       | 1     | 9       | 2       | 6990.5165 | 0.0009     |
| 1    | 1      | 0      | 1    | 0      | 4      | 1     | 0       | 1       | 1     | 4       | 3       | 6990.5165 | 0.0010     |
| 1    | 1      | 0      | 1    | 1      | 3      | 1     | 0       | 1       | 1     | 7       | 2       | 6990.5165 | 0.0008     |
| 1    | 1      | 0      | 1    | 5      | 2      | 1     | 0       | 1       | 1     | 13      | 1       | 6990.5201 | 0.0019     |
| 1    | 0      | 1      | 0    | 3      | 3      | 0     | 0       | 0       | 0     | 2       | 2       | 8412.6309 | 0.0052     |
| 1    | 0      | 1      | 0    | 1      | 1      | 0     | 0       | 0       | 0     | 2       | 2       | 8427.2748 | -0.0023    |
| 2    | 1      | 1      | 0    | 2      | 2      | 2     | 0       | 2       | 0     | 1       | 1       | 8934.0965 | 0.0013     |
| 2    | 1      | 1      | 0    | 3      | 2      | 2     | 0       | 2       | 0     | 4       | 3       | 8939.7680 | -0.0042    |
| 2    | 1      | 1      | 0    | 3      | 3      | 2     | 0       | 2       | 0     | 4       | 4       | 8939.7680 | -0.0070    |
| 2    | 1      | 1      | 0    | 1      | 1      | 2     | 0       | 2       | 0     | 1       | 1       | 8943.8407 | -0.0009    |
| 2    | 1      | 1      | 0    | 1      | 1      | 2     | 0       | 2       | 0     | 1       | 0       | 8943.8525 | -0.0011    |
| 2    | 1      | 1      | 0    | 3      | 2      | 2     | 0       | 2       | 0     | 2       | 1       | 8944.8086 | 0.0043     |
| 2    | 1      | 1      | 0    | 3      | 3      | 2     | 0       | 2       | 0     | 2       | 2       | 8944.8149 | 0.0037     |
| 2    | 1      | 1      | 1    | 3      | 4      | 2     | 0       | 2       | 1     | 3       | 4       | 8949.4967 | -0.0001    |
| 2    | 1      | 1      | 1    | 6      | 3      | 2     | 0       | 2       | 1     | 6       | 3       | 8949.4967 | -0.0013    |
| 2    | 1      | 1      | 1    | 0      | 5      | 2     | 0       | 2       | 1     | 0       | 5       | 8949.5036 | 0.0007     |
| 2    | 1      | 1      | 1    | 1      | 4      | 2     | 0       | 2       | 1     | 1       | 4       | 8949.5036 | -0.0007    |
| 2    | 1      | 1      | 1    | 2      | 4      | 2     | 0       | 2       | 1     | 2       | 4       | 8949.5080 | -0.0001    |
| 2    | 1      | 1      | 0    | 2      | 1      | 2     | 0       | 2       | 0     | 2       | 1       | 8951.7600 | -0.0004    |
| 2    | 1      | 1      | 0    | 2      | 2      | 2     | 0       | 2       | 0     | 2       | 2       | 8951.7644 | -0.0004    |
| 2    | 1      | 1      | 0    | 3      | 2      | 2     | 0       | 2       | 0     | 3       | 2       | 8957.4544 | 0.0010     |
| 2    | 1      | 1      | 0    | 3      | 3      | 2     | 0       | 2       | 0     | 3       | 3       | 8957.4585 | -0.0001    |
| 2    | 1      | 1      | 0    | 1      | 0      | 2     | 0       | 2       | 0     | 2       | 1       | 8961.5009 | -0.0023    |
| 2    | 1      | 1      | 0    | 1      | 1      | 2     | 0       | 2       | 0     | 2       | 2       | 8961.5085 | -0.0027    |
| 2    | 1      | 1      | 0    | 2      | 1      | 2     | 0       | 2       | 0     | 3       | 2       | 8964.4072 | -0.0023    |
| 2    | 1      | 1      | 0    | 2      | 2      | 2     | 0       | 2       | 0     | 3       | 3       | 8964.4072 | -0.0050    |
| 2    | 1      | 1      | 0    | 4      | 3      | 2     | 0       | 2       | 0     | 3       | 2       | 8967.1851 | 0.0060     |

Table S3: Observed Transition Frequencies (in MHz) for  $^{13}\text{CH}_2\text{C}^{35}\text{ClF}$ 

|   |   |   |   |    |   |   |   |   |   |    |   |            |         |
|---|---|---|---|----|---|---|---|---|---|----|---|------------|---------|
| 2 | 1 | 1 | 0 | 4  | 4 | 2 | 0 | 2 | 0 | 3  | 3 | 8967.1914  | 0.0035  |
| 2 | 0 | 2 | 0 | 3  | 2 | 1 | 1 | 1 | 0 | 2  | 1 | 11141.0212 | 0.0023  |
| 2 | 0 | 2 | 0 | 3  | 3 | 1 | 1 | 1 | 0 | 2  | 2 | 11141.0264 | 0.0023  |
| 2 | 0 | 2 | 0 | 2  | 1 | 1 | 1 | 1 | 0 | 2  | 1 | 11153.6656 | -0.0024 |
| 2 | 0 | 2 | 0 | 2  | 2 | 1 | 1 | 1 | 0 | 2  | 2 | 11153.6703 | -0.0012 |
| 2 | 0 | 2 | 0 | 2  | 2 | 1 | 1 | 1 | 0 | 3  | 3 | 11163.3991 | -0.0054 |
| 2 | 0 | 2 | 0 | 2  | 1 | 1 | 1 | 1 | 0 | 3  | 2 | 11163.4048 | -0.0039 |
| 2 | 0 | 2 | 0 | 4  | 4 | 1 | 1 | 1 | 0 | 3  | 3 | 11168.4474 | 0.0067  |
| 2 | 0 | 2 | 0 | 4  | 3 | 1 | 1 | 1 | 0 | 3  | 2 | 11168.4474 | 0.0067  |
| 2 | 0 | 2 | 0 | 2  | 1 | 1 | 1 | 1 | 0 | 1  | 0 | 11171.1868 | 0.0019  |
| 2 | 0 | 2 | 0 | 2  | 2 | 1 | 1 | 1 | 0 | 1  | 1 | 11171.2025 | 0.0004  |
| 2 | 0 | 2 | 0 | 1  | 0 | 1 | 1 | 1 | 0 | 2  | 1 | 11171.3305 | -0.0047 |
| 2 | 0 | 2 | 0 | 1  | 1 | 1 | 1 | 1 | 0 | 2  | 2 | 11171.3380 | -0.0031 |
| 2 | 0 | 2 | 0 | 1  | 0 | 1 | 1 | 1 | 0 | 1  | 1 | 11188.8587 | -0.0010 |
| 2 | 0 | 2 | 0 | 1  | 1 | 1 | 1 | 1 | 0 | 1  | 0 | 11188.8629 | -0.0012 |
| 2 | 0 | 2 | 0 | 1  | 1 | 1 | 1 | 1 | 0 | 1  | 1 | 11188.8696 | -0.0021 |
| 3 | 1 | 2 | 0 | 4  | 4 | 2 | 2 | 1 | 0 | 3  | 3 | 11457.4372 | 0.0030  |
| 3 | 1 | 2 | 0 | 4  | 3 | 2 | 2 | 1 | 0 | 3  | 2 | 11457.4372 | -0.0001 |
| 3 | 1 | 2 | 1 | 2  | 5 | 2 | 2 | 1 | 1 | 2  | 4 | 11489.7978 | -0.0029 |
| 3 | 1 | 2 | 1 | 0  | 6 | 2 | 2 | 1 | 1 | 0  | 5 | 11489.8108 | 0.0033  |
| 3 | 1 | 2 | 1 | 3  | 5 | 2 | 2 | 1 | 1 | 3  | 4 | 11489.8217 | 0.0078  |
| 3 | 1 | 2 | 1 | 12 | 3 | 2 | 2 | 1 | 1 | 12 | 2 | 11489.8217 | 0.0057  |
| 3 | 1 | 2 | 0 | 2  | 2 | 2 | 2 | 1 | 0 | 1  | 1 | 11509.4641 | -0.0056 |
| 3 | 1 | 2 | 0 | 3  | 2 | 3 | 0 | 3 | 0 | 2  | 1 | 12407.6453 | 0.0066  |
| 3 | 1 | 2 | 0 | 3  | 3 | 3 | 0 | 3 | 0 | 2  | 2 | 12407.6453 | 0.0029  |
| 3 | 1 | 2 | 0 | 4  | 3 | 3 | 0 | 3 | 0 | 5  | 4 | 12408.9535 | -0.0028 |
| 3 | 1 | 2 | 0 | 4  | 4 | 3 | 0 | 3 | 0 | 5  | 5 | 12408.9535 | -0.0067 |
| 3 | 1 | 2 | 0 | 4  | 4 | 3 | 0 | 3 | 0 | 3  | 3 | 12417.9926 | 0.0035  |
| 3 | 1 | 2 | 0 | 2  | 1 | 3 | 0 | 3 | 0 | 2  | 1 | 12421.7140 | 0.0033  |
| 3 | 1 | 2 | 0 | 2  | 2 | 3 | 0 | 3 | 0 | 2  | 2 | 12421.7140 | -0.0026 |
| 3 | 1 | 2 | 1 | 3  | 5 | 3 | 0 | 3 | 1 | 3  | 5 | 12423.0190 | -0.0006 |
| 3 | 1 | 2 | 1 | 6  | 4 | 3 | 0 | 3 | 1 | 6  | 4 | 12423.0190 | -0.0018 |
| 3 | 1 | 2 | 1 | 8  | 4 | 3 | 0 | 3 | 1 | 8  | 4 | 12423.0270 | 0.0026  |
| 3 | 1 | 2 | 1 | 5  | 4 | 3 | 0 | 3 | 1 | 5  | 4 | 12423.0270 | 0.0025  |
| 3 | 1 | 2 | 1 | 0  | 6 | 3 | 0 | 3 | 1 | 0  | 6 | 12423.0270 | 0.0015  |
| 3 | 1 | 2 | 1 | 2  | 5 | 3 | 0 | 3 | 1 | 2  | 5 | 12423.0348 | 0.0043  |
| 3 | 1 | 2 | 0 | 3  | 2 | 3 | 0 | 3 | 0 | 3  | 2 | 12424.5546 | 0.0033  |
| 3 | 1 | 2 | 0 | 3  | 3 | 3 | 0 | 3 | 0 | 3  | 3 | 12424.5546 | -0.0021 |
| 3 | 1 | 2 | 0 | 4  | 4 | 3 | 0 | 3 | 0 | 4  | 4 | 12425.9058 | -0.0023 |
| 3 | 1 | 2 | 0 | 3  | 2 | 3 | 0 | 3 | 0 | 4  | 3 | 12432.4684 | -0.0027 |
| 3 | 1 | 2 | 0 | 3  | 3 | 3 | 0 | 3 | 0 | 4  | 4 | 12432.4684 | -0.0072 |
| 3 | 1 | 2 | 0 | 2  | 1 | 3 | 0 | 3 | 0 | 3  | 2 | 12438.6182 | -0.0051 |
| 3 | 1 | 2 | 0 | 2  | 2 | 3 | 0 | 3 | 0 | 3  | 3 | 12438.6257 | -0.0052 |
| 3 | 1 | 2 | 0 | 5  | 5 | 3 | 0 | 3 | 0 | 4  | 4 | 12439.9777 | 0.0030  |

Table S3: Observed Transition Frequencies (in MHz) for  $^{13}\text{CH}_2\text{C}^{35}\text{ClF}$ 

|   |   |   |   |   |   |   |   |   |   |   |   |            |         |
|---|---|---|---|---|---|---|---|---|---|---|---|------------|---------|
| 1 | 1 | 1 | 0 | 1 | 1 | 0 | 0 | 0 | 0 | 2 | 2 | 13729.1228 | -0.0025 |
| 1 | 1 | 1 | 0 | 1 | 0 | 0 | 0 | 0 | 0 | 2 | 1 | 13729.1277 | -0.0053 |
| 1 | 1 | 1 | 0 | 3 | 2 | 0 | 0 | 0 | 0 | 2 | 1 | 13736.9088 | -0.0004 |
| 1 | 1 | 1 | 0 | 3 | 3 | 0 | 0 | 0 | 0 | 2 | 2 | 13736.9250 | 0.0021  |
| 1 | 1 | 1 | 0 | 2 | 1 | 0 | 0 | 0 | 0 | 2 | 1 | 13746.6527 | 0.0029  |
| 1 | 1 | 1 | 0 | 2 | 2 | 0 | 0 | 0 | 0 | 2 | 2 | 13746.6527 | -0.0032 |
| 2 | 1 | 2 | 0 | 3 | 2 | 1 | 1 | 1 | 0 | 2 | 1 | 15156.2912 | 0.0017  |
| 2 | 1 | 2 | 0 | 3 | 3 | 1 | 1 | 1 | 0 | 2 | 2 | 15156.2999 | 0.0025  |
| 2 | 1 | 2 | 0 | 2 | 2 | 1 | 1 | 1 | 0 | 2 | 2 | 15162.4247 | -0.0011 |
| 2 | 1 | 2 | 0 | 3 | 2 | 1 | 1 | 1 | 0 | 3 | 2 | 15166.0295 | -0.0007 |
| 2 | 1 | 2 | 0 | 3 | 3 | 1 | 1 | 1 | 0 | 3 | 3 | 15166.0295 | -0.0009 |
| 2 | 1 | 2 | 0 | 1 | 0 | 1 | 1 | 1 | 0 | 2 | 1 | 15170.9934 | -0.0033 |
| 2 | 1 | 2 | 0 | 1 | 1 | 1 | 1 | 1 | 0 | 2 | 2 | 15171.0037 | -0.0017 |
| 2 | 1 | 2 | 0 | 2 | 2 | 1 | 1 | 1 | 0 | 3 | 3 | 15172.1554 | -0.0034 |
| 2 | 1 | 2 | 0 | 2 | 1 | 1 | 1 | 1 | 0 | 3 | 2 | 15172.1554 | -0.0052 |
| 2 | 1 | 2 | 0 | 4 | 3 | 1 | 1 | 1 | 0 | 3 | 2 | 15174.5949 | 0.0058  |
| 2 | 1 | 2 | 0 | 4 | 4 | 1 | 1 | 1 | 0 | 3 | 3 | 15174.6004 | 0.0081  |
| 2 | 1 | 2 | 0 | 2 | 1 | 1 | 1 | 1 | 0 | 1 | 0 | 15179.9378 | 0.0009  |
| 2 | 1 | 2 | 0 | 2 | 2 | 1 | 1 | 1 | 0 | 1 | 1 | 15179.9555 | -0.0009 |
| 2 | 1 | 2 | 0 | 1 | 0 | 1 | 1 | 1 | 0 | 1 | 1 | 15188.5203 | -0.0009 |
| 2 | 1 | 2 | 0 | 1 | 1 | 1 | 1 | 1 | 0 | 1 | 1 | 15188.5342 | -0.0019 |
| 4 | 2 | 2 | 0 | 3 | 3 | 4 | 1 | 3 | 0 | 3 | 3 | 15233.4031 | 0.0007  |
| 4 | 2 | 2 | 0 | 6 | 6 | 4 | 1 | 3 | 0 | 6 | 6 | 15235.6245 | 0.0006  |
| 4 | 2 | 2 | 0 | 4 | 4 | 4 | 1 | 3 | 0 | 4 | 4 | 15239.7422 | -0.0011 |
| 4 | 2 | 2 | 0 | 5 | 5 | 4 | 1 | 3 | 0 | 5 | 5 | 15241.9745 | -0.0001 |
| 3 | 2 | 1 | 0 | 2 | 1 | 3 | 1 | 2 | 0 | 2 | 1 | 15292.5454 | 0.0042  |
| 3 | 2 | 1 | 0 | 2 | 2 | 3 | 1 | 2 | 0 | 2 | 2 | 15292.5524 | 0.0029  |
| 3 | 2 | 1 | 0 | 5 | 5 | 3 | 1 | 2 | 0 | 5 | 5 | 15298.4594 | -0.0082 |
| 3 | 2 | 1 | 0 | 3 | 3 | 3 | 1 | 2 | 0 | 3 | 3 | 15305.2359 | 0.0014  |
| 3 | 2 | 1 | 0 | 4 | 4 | 3 | 1 | 2 | 0 | 4 | 4 | 15311.1674 | -0.0025 |
| 2 | 2 | 0 | 0 | 1 | 1 | 2 | 1 | 1 | 0 | 1 | 1 | 16288.7227 | 0.0010  |
| 2 | 2 | 0 | 0 | 1 | 0 | 2 | 1 | 1 | 0 | 2 | 1 | 16298.4521 | -0.0016 |
| 2 | 2 | 0 | 0 | 1 | 1 | 2 | 1 | 1 | 0 | 2 | 2 | 16298.4672 | -0.0008 |
| 2 | 2 | 0 | 0 | 2 | 2 | 2 | 1 | 1 | 0 | 1 | 1 | 16306.3964 | 0.0031  |
| 2 | 2 | 0 | 0 | 4 | 3 | 2 | 1 | 1 | 0 | 4 | 3 | 16308.3018 | -0.0068 |
| 2 | 2 | 0 | 0 | 4 | 4 | 2 | 1 | 1 | 0 | 4 | 4 | 16308.3172 | -0.0039 |
| 2 | 2 | 0 | 0 | 2 | 1 | 2 | 1 | 1 | 0 | 2 | 1 | 16316.1327 | 0.0017  |
| 2 | 2 | 0 | 0 | 2 | 2 | 2 | 1 | 1 | 0 | 2 | 2 | 16316.1410 | 0.0013  |
| 2 | 2 | 0 | 0 | 4 | 3 | 2 | 1 | 1 | 0 | 3 | 2 | 16318.0357 | 0.0013  |
| 2 | 2 | 0 | 0 | 4 | 4 | 2 | 1 | 1 | 0 | 3 | 3 | 16318.0512 | 0.0008  |
| 2 | 2 | 0 | 0 | 2 | 1 | 2 | 1 | 1 | 0 | 3 | 2 | 16323.0855 | -0.0016 |
| 2 | 2 | 0 | 0 | 2 | 2 | 2 | 1 | 1 | 0 | 3 | 3 | 16323.0912 | -0.0021 |
| 2 | 2 | 0 | 0 | 3 | 2 | 2 | 1 | 1 | 0 | 2 | 1 | 16328.7762 | 0.0060  |
| 2 | 2 | 0 | 0 | 3 | 3 | 2 | 1 | 1 | 0 | 2 | 2 | 16328.7880 | 0.0051  |

Table S3: Observed Transition Frequencies (in MHz) for  $^{13}\text{CH}_2\text{C}^{35}\text{ClF}$ 

|   |   |   |   |   |   |   |   |   |   |   |   |            |         |
|---|---|---|---|---|---|---|---|---|---|---|---|------------|---------|
| 2 | 2 | 0 | 0 | 3 | 2 | 2 | 1 | 1 | 0 | 3 | 2 | 16335.7278 | 0.0016  |
| 2 | 2 | 0 | 0 | 3 | 3 | 2 | 1 | 1 | 0 | 3 | 3 | 16335.7363 | -0.0002 |
| 2 | 0 | 2 | 0 | 2 | 1 | 1 | 0 | 1 | 0 | 1 | 0 | 16473.0364 | -0.0003 |
| 2 | 0 | 2 | 0 | 2 | 2 | 1 | 0 | 1 | 0 | 1 | 1 | 16473.0498 | -0.0005 |
| 2 | 0 | 2 | 0 | 3 | 2 | 1 | 0 | 1 | 0 | 3 | 2 | 16475.0501 | -0.0002 |
| 2 | 0 | 2 | 0 | 3 | 3 | 1 | 0 | 1 | 0 | 3 | 3 | 16475.0501 | -0.0042 |
| 2 | 0 | 2 | 0 | 1 | 0 | 1 | 0 | 1 | 0 | 1 | 1 | 16490.7069 | -0.0010 |
| 2 | 0 | 2 | 0 | 1 | 1 | 1 | 0 | 1 | 0 | 1 | 1 | 16490.7175 | -0.0024 |
| 2 | 0 | 2 | 0 | 4 | 3 | 1 | 0 | 1 | 0 | 3 | 2 | 16492.7361 | 0.0046  |
| 2 | 0 | 2 | 0 | 4 | 4 | 1 | 0 | 1 | 0 | 3 | 3 | 16492.7412 | 0.0033  |
| 2 | 0 | 2 | 0 | 3 | 2 | 1 | 0 | 1 | 0 | 2 | 1 | 16493.3570 | 0.0043  |
| 2 | 0 | 2 | 0 | 3 | 3 | 1 | 0 | 1 | 0 | 2 | 2 | 16493.3650 | 0.0043  |
| 2 | 0 | 2 | 0 | 2 | 1 | 1 | 0 | 1 | 0 | 2 | 1 | 16505.9999 | -0.0019 |
| 2 | 0 | 2 | 0 | 2 | 2 | 1 | 0 | 1 | 0 | 2 | 2 | 16506.0083 | 0.0002  |
| 2 | 0 | 2 | 0 | 1 | 0 | 1 | 0 | 1 | 0 | 2 | 1 | 16523.6660 | -0.0030 |
| 2 | 0 | 2 | 0 | 1 | 1 | 1 | 0 | 1 | 0 | 2 | 2 | 16523.6772 | -0.0005 |
| 2 | 1 | 1 | 0 | 3 | 2 | 1 | 1 | 0 | 0 | 2 | 1 | 18451.7295 | 0.0008  |
| 2 | 1 | 1 | 0 | 3 | 3 | 1 | 1 | 0 | 0 | 2 | 2 | 18451.7380 | -0.0005 |
| 2 | 1 | 1 | 0 | 2 | 2 | 1 | 1 | 0 | 0 | 2 | 2 | 18458.6887 | -0.0034 |
| 2 | 1 | 1 | 0 | 3 | 2 | 1 | 1 | 0 | 0 | 3 | 2 | 18460.3020 | -0.0006 |
| 2 | 1 | 1 | 0 | 3 | 3 | 1 | 1 | 0 | 0 | 3 | 3 | 18460.3020 | -0.0017 |
| 2 | 1 | 1 | 0 | 4 | 3 | 1 | 1 | 0 | 0 | 3 | 2 | 18470.0318 | 0.0035  |
| 2 | 1 | 1 | 0 | 4 | 4 | 1 | 1 | 0 | 0 | 3 | 3 | 18470.0381 | 0.0051  |
| 2 | 1 | 1 | 0 | 2 | 1 | 1 | 1 | 0 | 0 | 1 | 0 | 18474.1118 | 0.0047  |
| 2 | 1 | 1 | 0 | 2 | 2 | 1 | 1 | 0 | 0 | 1 | 1 | 18474.1309 | 0.0011  |
| 2 | 1 | 1 | 0 | 1 | 1 | 1 | 1 | 0 | 0 | 1 | 1 | 18483.8757 | -0.0004 |
| 3 | 0 | 3 | 0 | 4 | 3 | 2 | 1 | 2 | 0 | 4 | 3 | 19974.7971 | -0.0037 |
| 3 | 0 | 3 | 0 | 4 | 4 | 2 | 1 | 2 | 0 | 4 | 4 | 19974.7971 | -0.0048 |
| 3 | 0 | 3 | 0 | 4 | 3 | 2 | 1 | 2 | 0 | 3 | 2 | 19983.3605 | 0.0007  |
| 3 | 0 | 3 | 0 | 4 | 4 | 2 | 1 | 2 | 0 | 3 | 3 | 19983.3663 | 0.0025  |
| 3 | 0 | 3 | 0 | 3 | 2 | 2 | 1 | 2 | 0 | 2 | 1 | 19985.1483 | -0.0008 |
| 3 | 0 | 3 | 0 | 3 | 3 | 2 | 1 | 2 | 0 | 2 | 2 | 19985.1543 | -0.0001 |
| 3 | 0 | 3 | 0 | 3 | 2 | 2 | 1 | 2 | 0 | 3 | 2 | 19991.2778 | -0.0018 |
| 3 | 0 | 3 | 0 | 3 | 3 | 2 | 1 | 2 | 0 | 3 | 3 | 19991.2778 | -0.0050 |
| 3 | 0 | 3 | 0 | 5 | 4 | 2 | 1 | 2 | 0 | 4 | 3 | 19991.7526 | 0.0056  |
| 3 | 0 | 3 | 0 | 5 | 5 | 2 | 1 | 2 | 0 | 4 | 4 | 19991.7526 | 0.0029  |
| 3 | 0 | 3 | 0 | 2 | 2 | 2 | 1 | 2 | 0 | 1 | 1 | 19993.4876 | -0.0014 |
| 3 | 0 | 3 | 0 | 2 | 2 | 2 | 1 | 2 | 0 | 2 | 2 | 20002.0674 | -0.0013 |
| 2 | 1 | 2 | 0 | 2 | 1 | 1 | 0 | 1 | 0 | 1 | 0 | 20481.7873 | -0.0014 |
| 2 | 1 | 2 | 0 | 2 | 2 | 1 | 0 | 1 | 0 | 1 | 1 | 20481.8038 | -0.0008 |
| 2 | 1 | 2 | 0 | 3 | 3 | 1 | 0 | 1 | 0 | 3 | 3 | 20490.3228 | -0.0048 |
| 2 | 1 | 2 | 0 | 1 | 1 | 1 | 0 | 1 | 0 | 1 | 1 | 20490.3811 | -0.0032 |
| 2 | 1 | 2 | 0 | 4 | 3 | 1 | 0 | 1 | 0 | 3 | 2 | 20498.8804 | 0.0005  |
| 2 | 1 | 2 | 0 | 4 | 4 | 1 | 0 | 1 | 0 | 3 | 3 | 20498.8917 | 0.0022  |

Table S3: Observed Transition Frequencies (in MHz) for  $^{13}\text{CH}_2\text{C}^{35}\text{ClF}$

|   |   |   |   |   |   |   |   |   |   |   |   |            |         |
|---|---|---|---|---|---|---|---|---|---|---|---|------------|---------|
| 2 | 1 | 2 | 0 | 3 | 2 | 1 | 0 | 1 | 0 | 2 | 1 | 20508.6241 | 0.0008  |
| 2 | 1 | 2 | 0 | 3 | 3 | 1 | 0 | 1 | 0 | 2 | 2 | 20508.6380 | 0.0040  |
| 2 | 1 | 2 | 0 | 2 | 1 | 1 | 0 | 1 | 0 | 2 | 1 | 20514.7517 | -0.0021 |
| 2 | 1 | 2 | 0 | 2 | 2 | 1 | 0 | 1 | 0 | 2 | 2 | 20514.7624 | 0.0000  |

Table S4: Observed Transition Frequencies (in MHz) for CH<sub>2</sub>C<sup>37</sup>ClF

| $J'$ | $K_a'$ | $K_c'$ | $s'$ | $m_1'$ | $m_2'$ | $J''$ | $K_a''$ | $K_c''$ | $s''$ | $m_1''$ | $m_2''$ | Observed  | Obs - Calc |
|------|--------|--------|------|--------|--------|-------|---------|---------|-------|---------|---------|-----------|------------|
| 1    | 1      | 0      | 0    | 1      | 1      | 1     | 0       | 1       | 0     | 1       | 0       | 7279.6309 | -0.0010    |
| 1    | 1      | 0      | 0    | 1      | 1      | 1     | 0       | 1       | 0     | 1       | 1       | 7279.6352 | -0.0002    |
| 1    | 1      | 0      | 0    | 1      | 0      | 1     | 0       | 1       | 0     | 1       | 1       | 7279.6430 | 0.0004     |
| 1    | 1      | 0      | 1    | 10     | 2      | 1     | 0       | 1       | 1     | 18      | 1       | 7291.7920 | -0.0009    |
| 1    | 1      | 0      | 1    | 10     | 2      | 1     | 0       | 1       | 1     | 11      | 2       | 7291.7976 | 0.0012     |
| 1    | 1      | 0      | 1    | 14     | 1      | 1     | 0       | 1       | 1     | 15      | 1       | 7291.7976 | 0.0012     |
| 1    | 1      | 0      | 1    | 20     | 0      | 1     | 0       | 1       | 1     | 18      | 1       | 7291.7976 | 0.0011     |
| 1    | 1      | 0      | 1    | 9      | 2      | 1     | 0       | 1       | 1     | 17      | 1       | 7291.7995 | -0.0005    |
| 1    | 1      | 0      | 1    | 7      | 2      | 1     | 0       | 1       | 1     | 15      | 1       | 7291.8045 | 0.0024     |
| 1    | 1      | 0      | 1    | 4      | 3      | 1     | 0       | 1       | 1     | 11      | 2       | 7291.8045 | 0.0017     |
| 1    | 1      | 0      | 1    | 12     | 1      | 1     | 0       | 1       | 1     | 12      | 1       | 7296.5360 | -0.0038    |
| 1    | 1      | 0      | 1    | 3      | 3      | 1     | 0       | 1       | 1     | 3       | 3       | 7296.5445 | 0.0006     |
| 1    | 1      | 0      | 1    | 6      | 2      | 1     | 0       | 1       | 1     | 6       | 2       | 7296.5445 | -0.0007    |
| 1    | 1      | 0      | 1    | 5      | 2      | 1     | 0       | 1       | 1     | 5       | 2       | 7296.5483 | 0.0010     |
| 1    | 1      | 0      | 1    | 0      | 4      | 1     | 0       | 1       | 1     | 0       | 4       | 7296.5483 | -0.0017    |
| 1    | 1      | 0      | 1    | 1      | 3      | 1     | 0       | 1       | 1     | 1       | 3       | 7296.5507 | -0.0012    |
| 1    | 1      | 0      | 1    | 2      | 3      | 1     | 0       | 1       | 1     | 2       | 3       | 7296.5601 | 0.0028     |
| 1    | 1      | 0      | 0    | 2      | 2      | 1     | 0       | 1       | 0     | 3       | 3       | 7303.2999 | -0.0029    |
| 1    | 1      | 0      | 0    | 2      | 1      | 1     | 0       | 1       | 0     | 3       | 2       | 7303.2999 | -0.0034    |
| 1    | 1      | 0      | 1    | 17     | 1      | 1     | 0       | 1       | 1     | 9       | 2       | 7305.5067 | 0.0010     |
| 1    | 1      | 0      | 1    | 15     | 1      | 1     | 0       | 1       | 1     | 7       | 2       | 7305.5090 | 0.0002     |
| 1    | 1      | 0      | 1    | 11     | 2      | 1     | 0       | 1       | 1     | 4       | 3       | 7305.5090 | -0.0006    |
| 1    | 1      | 0      | 1    | 11     | 2      | 1     | 0       | 1       | 1     | 10      | 2       | 7305.5149 | 0.0027     |
| 1    | 1      | 0      | 1    | 21     | 0      | 1     | 0       | 1       | 1     | 13      | 1       | 7305.5149 | 0.0015     |
| 1    | 1      | 0      | 1    | 18     | 1      | 1     | 0       | 1       | 1     | 16      | 1       | 7305.5149 | 0.0000     |
| 1    | 1      | 0      | 1    | 18     | 1      | 1     | 0       | 1       | 1     | 10      | 2       | 7305.5195 | 0.0001     |
| 1    | 1      | 0      | 0    | 3      | 2      | 1     | 0       | 1       | 0     | 2       | 1       | 7310.9180 | 0.0036     |
| 1    | 1      | 0      | 0    | 3      | 3      | 1     | 0       | 1       | 0     | 2       | 2       | 7310.9269 | 0.0023     |
| 1    | 1      | 0      | 1    | 9      | 2      | 1     | 0       | 1       | 1     | 9       | 2       | 7317.6732 | 0.0029     |
| 1    | 1      | 0      | 1    | 10     | 2      | 1     | 0       | 1       | 1     | 10      | 2       | 7317.6732 | 0.0000     |
| 1    | 1      | 0      | 1    | 7      | 2      | 1     | 0       | 1       | 1     | 7       | 2       | 7317.6764 | 0.0009     |
| 1    | 1      | 0      | 1    | 4      | 3      | 1     | 0       | 1       | 1     | 4       | 3       | 7317.6764 | -0.0006    |
| 1    | 1      | 0      | 1    | 13     | 1      | 1     | 0       | 1       | 1     | 13      | 1       | 7317.6791 | -0.0041    |
| 1    | 0      | 1      | 0    | 2      | 1      | 0     | 0       | 0       | 0     | 2       | 1       | 8324.2655 | 0.0007     |
| 1    | 0      | 1      | 0    | 2      | 2      | 0     | 0       | 0       | 0     | 2       | 2       | 8324.2655 | -0.0021    |
| 1    | 0      | 1      | 0    | 3      | 2      | 0     | 0       | 0       | 0     | 2       | 1       | 8338.6370 | 0.0030     |
| 1    | 0      | 1      | 0    | 3      | 3      | 0     | 0       | 0       | 0     | 2       | 2       | 8338.6432 | 0.0029     |
| 1    | 0      | 1      | 0    | 1      | 1      | 0     | 0       | 0       | 0     | 2       | 2       | 8350.1394 | -0.0016    |
| 2    | 1      | 1      | 0    | 2      | 1      | 2     | 0       | 2       | 0     | 1       | 1       | 9143.9383 | -0.0017    |
| 2    | 1      | 1      | 0    | 2      | 1      | 2     | 0       | 2       | 0     | 1       | 0       | 9143.9429 | -0.0073    |
| 2    | 1      | 1      | 0    | 2      | 2      | 2     | 0       | 2       | 0     | 1       | 1       | 9143.9528 | 0.0009     |
| 2    | 1      | 1      | 0    | 3      | 2      | 2     | 0       | 2       | 0     | 4       | 3       | 9148.4821 | -0.0042    |
| 2    | 1      | 1      | 0    | 3      | 3      | 2     | 0       | 2       | 0     | 4       | 4       | 9148.4821 | -0.0066    |

Table S4: Observed Transition Frequencies (in MHz) for CH<sub>2</sub>C<sup>37</sup>ClF

|   |   |   |   |   |   |   |   |   |   |   |   |           |         |
|---|---|---|---|---|---|---|---|---|---|---|---|-----------|---------|
| 2 | 1 | 1 | 0 | 1 | 0 | 2 | 0 | 2 | 0 | 1 | 1 | 9151.5616 | 0.0012  |
| 2 | 1 | 1 | 0 | 1 | 1 | 2 | 0 | 2 | 0 | 1 | 1 | 9151.5751 | -0.0003 |
| 2 | 1 | 1 | 0 | 1 | 1 | 2 | 0 | 2 | 0 | 1 | 0 | 9151.5848 | -0.0008 |
| 2 | 1 | 1 | 0 | 3 | 2 | 2 | 0 | 2 | 0 | 2 | 1 | 9152.4659 | 0.0021  |
| 2 | 1 | 1 | 0 | 3 | 3 | 2 | 0 | 2 | 0 | 2 | 2 | 9152.4721 | 0.0025  |
| 2 | 1 | 1 | 0 | 4 | 3 | 2 | 0 | 2 | 0 | 4 | 3 | 9156.0974 | 0.0005  |
| 2 | 1 | 1 | 0 | 4 | 4 | 2 | 0 | 2 | 0 | 4 | 4 | 9156.1010 | -0.0012 |
| 2 | 1 | 1 | 0 | 2 | 1 | 2 | 0 | 2 | 0 | 2 | 1 | 9157.9055 | -0.0006 |
| 2 | 1 | 1 | 0 | 2 | 2 | 2 | 0 | 2 | 0 | 2 | 2 | 9157.9097 | -0.0002 |
| 2 | 1 | 1 | 0 | 3 | 2 | 2 | 0 | 2 | 0 | 3 | 2 | 9162.4510 | -0.0002 |
| 2 | 1 | 1 | 0 | 3 | 3 | 2 | 0 | 2 | 0 | 3 | 3 | 9162.4555 | -0.0001 |
| 2 | 1 | 1 | 0 | 1 | 0 | 2 | 0 | 2 | 0 | 2 | 1 | 9165.5250 | -0.0015 |
| 2 | 1 | 1 | 0 | 1 | 1 | 2 | 0 | 2 | 0 | 2 | 2 | 9165.5319 | -0.0014 |
| 2 | 1 | 1 | 0 | 1 | 1 | 2 | 0 | 2 | 0 | 2 | 1 | 9165.5380 | -0.0035 |
| 2 | 1 | 1 | 0 | 2 | 1 | 2 | 0 | 2 | 0 | 3 | 2 | 9167.8926 | -0.0009 |
| 2 | 1 | 1 | 0 | 2 | 2 | 2 | 0 | 2 | 0 | 3 | 3 | 9167.8926 | -0.0032 |
| 2 | 1 | 1 | 0 | 4 | 3 | 2 | 0 | 2 | 0 | 3 | 2 | 9170.0664 | 0.0047  |
| 2 | 1 | 1 | 0 | 4 | 4 | 2 | 0 | 2 | 0 | 3 | 3 | 9170.0740 | 0.0049  |
| 3 | 1 | 2 | 0 | 4 | 3 | 3 | 1 | 3 | 0 | 5 | 4 | 9405.0687 | -0.0034 |
| 3 | 1 | 2 | 0 | 4 | 4 | 3 | 1 | 3 | 0 | 5 | 5 | 9405.0687 | -0.0055 |
| 3 | 1 | 2 | 0 | 3 | 2 | 3 | 1 | 3 | 0 | 2 | 1 | 9405.4481 | 0.0015  |
| 3 | 1 | 2 | 0 | 3 | 3 | 3 | 1 | 3 | 0 | 2 | 2 | 9405.4481 | -0.0004 |
| 3 | 1 | 2 | 0 | 4 | 3 | 3 | 1 | 3 | 0 | 3 | 2 | 9410.5283 | 0.0030  |
| 3 | 1 | 2 | 0 | 4 | 4 | 3 | 1 | 3 | 0 | 3 | 3 | 9410.5333 | 0.0037  |
| 3 | 1 | 2 | 0 | 4 | 3 | 3 | 1 | 3 | 0 | 4 | 3 | 9415.3086 | 0.0017  |
| 3 | 1 | 2 | 0 | 4 | 4 | 3 | 1 | 3 | 0 | 4 | 4 | 9415.3086 | -0.0020 |
| 3 | 1 | 2 | 0 | 3 | 2 | 3 | 1 | 3 | 0 | 3 | 2 | 9415.6888 | 0.0023  |
| 3 | 1 | 2 | 0 | 3 | 3 | 3 | 1 | 3 | 0 | 3 | 3 | 9415.6888 | -0.0012 |
| 3 | 1 | 2 | 0 | 5 | 4 | 3 | 1 | 3 | 0 | 5 | 4 | 9416.1282 | 0.0035  |
| 3 | 1 | 2 | 0 | 5 | 5 | 3 | 1 | 3 | 0 | 5 | 5 | 9416.1282 | -0.0005 |
| 3 | 1 | 2 | 0 | 2 | 1 | 3 | 1 | 3 | 0 | 2 | 1 | 9416.5049 | 0.0015  |
| 3 | 1 | 2 | 0 | 2 | 2 | 3 | 1 | 3 | 0 | 2 | 2 | 9416.5049 | -0.0023 |
| 3 | 1 | 2 | 0 | 3 | 2 | 3 | 1 | 3 | 0 | 4 | 3 | 9420.4655 | -0.0027 |
| 3 | 1 | 2 | 0 | 3 | 3 | 3 | 1 | 3 | 0 | 4 | 4 | 9420.4655 | -0.0055 |
| 3 | 1 | 2 | 0 | 5 | 4 | 3 | 1 | 3 | 0 | 4 | 3 | 9426.3651 | 0.0056  |
| 3 | 1 | 2 | 0 | 5 | 5 | 3 | 1 | 3 | 0 | 4 | 4 | 9426.3716 | 0.0066  |
| 3 | 1 | 2 | 0 | 2 | 1 | 3 | 1 | 3 | 0 | 3 | 2 | 9426.7397 | -0.0037 |
| 3 | 1 | 2 | 0 | 2 | 2 | 3 | 1 | 3 | 0 | 3 | 3 | 9426.7460 | -0.0027 |
| 3 | 1 | 2 | 0 | 4 | 4 | 2 | 2 | 1 | 0 | 3 | 3 | 9977.9838 | 0.0030  |
| 3 | 1 | 2 | 0 | 4 | 3 | 2 | 2 | 1 | 0 | 3 | 2 | 9977.9838 | 0.0008  |
| 3 | 1 | 2 | 0 | 3 | 3 | 2 | 2 | 1 | 0 | 3 | 3 | 9983.1410 | -0.0002 |
| 3 | 1 | 2 | 0 | 3 | 2 | 2 | 2 | 1 | 0 | 3 | 2 | 9983.1410 | -0.0033 |
| 3 | 1 | 2 | 0 | 4 | 4 | 2 | 2 | 1 | 0 | 4 | 4 | 9992.3550 | 0.0013  |
| 3 | 1 | 2 | 0 | 4 | 3 | 2 | 2 | 1 | 0 | 4 | 3 | 9992.3605 | -0.0002 |

Table S4: Observed Transition Frequencies (in MHz) for CH<sub>2</sub>C<sup>37</sup>ClF

|   |   |   |   |   |   |   |   |   |   |   |   |            |         |
|---|---|---|---|---|---|---|---|---|---|---|---|------------|---------|
| 3 | 1 | 2 | 0 | 3 | 2 | 2 | 2 | 1 | 0 | 2 | 1 | 9993.4129  | 0.0013  |
| 3 | 1 | 2 | 0 | 3 | 3 | 2 | 2 | 1 | 0 | 2 | 2 | 9993.4129  | 0.0011  |
| 3 | 1 | 2 | 0 | 2 | 2 | 2 | 2 | 1 | 0 | 3 | 3 | 9994.1960  | -0.0039 |
| 3 | 1 | 2 | 0 | 2 | 1 | 2 | 2 | 1 | 0 | 3 | 2 | 9994.1960  | -0.0051 |
| 3 | 1 | 2 | 0 | 3 | 3 | 2 | 2 | 1 | 0 | 4 | 4 | 9997.5104  | -0.0037 |
| 3 | 1 | 2 | 0 | 3 | 2 | 2 | 2 | 1 | 0 | 4 | 3 | 9997.5181  | -0.0039 |
| 3 | 1 | 2 | 0 | 2 | 1 | 2 | 2 | 1 | 0 | 2 | 1 | 10004.4685 | 0.0001  |
| 3 | 1 | 2 | 0 | 2 | 2 | 2 | 2 | 1 | 0 | 2 | 2 | 10004.4685 | -0.0021 |
| 3 | 1 | 2 | 0 | 2 | 2 | 2 | 2 | 1 | 0 | 1 | 1 | 10018.8420 | -0.0011 |
| 3 | 1 | 2 | 0 | 2 | 1 | 2 | 2 | 1 | 0 | 1 | 0 | 10018.8451 | -0.0006 |
| 2 | 0 | 2 | 0 | 3 | 2 | 1 | 1 | 1 | 0 | 2 | 1 | 10646.8899 | 0.0009  |
| 2 | 0 | 2 | 0 | 3 | 3 | 1 | 1 | 1 | 0 | 2 | 2 | 10646.8947 | 0.0012  |
| 2 | 0 | 2 | 0 | 3 | 3 | 1 | 1 | 1 | 0 | 3 | 3 | 10654.5085 | 0.0004  |
| 2 | 0 | 2 | 0 | 3 | 2 | 1 | 1 | 1 | 0 | 3 | 2 | 10654.5085 | -0.0015 |
| 2 | 0 | 2 | 0 | 2 | 1 | 1 | 1 | 1 | 0 | 2 | 1 | 10656.8779 | 0.0015  |
| 2 | 0 | 2 | 0 | 2 | 2 | 1 | 1 | 1 | 0 | 2 | 2 | 10656.8779 | -0.0015 |
| 2 | 0 | 2 | 0 | 2 | 2 | 1 | 1 | 1 | 0 | 3 | 3 | 10664.4913 | -0.0028 |
| 2 | 0 | 2 | 0 | 2 | 1 | 1 | 1 | 1 | 0 | 3 | 2 | 10664.4948 | -0.0026 |
| 2 | 0 | 2 | 0 | 4 | 3 | 1 | 1 | 1 | 0 | 3 | 2 | 10668.4790 | 0.0042  |
| 2 | 0 | 2 | 0 | 4 | 4 | 1 | 1 | 1 | 0 | 3 | 3 | 10668.4790 | 0.0040  |
| 2 | 0 | 2 | 0 | 2 | 1 | 1 | 1 | 1 | 0 | 1 | 0 | 10670.5814 | 0.0009  |
| 2 | 0 | 2 | 0 | 2 | 1 | 1 | 1 | 1 | 0 | 1 | 1 | 10670.5894 | 0.0025  |
| 2 | 0 | 2 | 0 | 2 | 2 | 1 | 1 | 1 | 0 | 1 | 1 | 10670.5961 | 0.0010  |
| 2 | 0 | 2 | 0 | 1 | 0 | 1 | 1 | 1 | 0 | 2 | 1 | 10670.8301 | -0.0021 |
| 2 | 0 | 2 | 0 | 1 | 1 | 1 | 1 | 1 | 0 | 2 | 2 | 10670.8345 | -0.0029 |
| 2 | 0 | 2 | 0 | 1 | 0 | 1 | 1 | 1 | 0 | 1 | 1 | 10684.5427 | -0.0001 |
| 2 | 0 | 2 | 0 | 1 | 1 | 1 | 1 | 1 | 0 | 1 | 0 | 10684.5463 | -0.0003 |
| 2 | 0 | 2 | 0 | 1 | 1 | 1 | 1 | 1 | 0 | 1 | 1 | 10684.5523 | -0.0007 |
| 3 | 1 | 2 | 0 | 3 | 2 | 3 | 0 | 3 | 0 | 2 | 1 | 12385.9747 | 0.0028  |
| 3 | 1 | 2 | 0 | 3 | 3 | 3 | 0 | 3 | 0 | 2 | 2 | 12385.9773 | 0.0022  |
| 3 | 1 | 2 | 0 | 4 | 3 | 3 | 0 | 3 | 0 | 5 | 4 | 12387.0864 | -0.0044 |
| 3 | 1 | 2 | 0 | 4 | 4 | 3 | 0 | 3 | 0 | 5 | 5 | 12387.0864 | -0.0078 |
| 3 | 1 | 2 | 0 | 4 | 3 | 3 | 0 | 3 | 0 | 3 | 2 | 12394.2665 | 0.0035  |
| 3 | 1 | 2 | 0 | 4 | 4 | 3 | 0 | 3 | 0 | 3 | 3 | 12394.2724 | 0.0039  |
| 3 | 1 | 2 | 0 | 2 | 1 | 3 | 0 | 3 | 0 | 2 | 1 | 12397.0288 | 0.0001  |
| 3 | 1 | 2 | 0 | 2 | 2 | 3 | 0 | 3 | 0 | 2 | 2 | 12397.0340 | 0.0002  |
| 3 | 1 | 2 | 0 | 5 | 4 | 3 | 0 | 3 | 0 | 5 | 4 | 12398.1459 | 0.0025  |
| 3 | 1 | 2 | 0 | 5 | 5 | 3 | 0 | 3 | 0 | 5 | 5 | 12398.1459 | -0.0028 |
| 3 | 1 | 2 | 0 | 3 | 2 | 3 | 0 | 3 | 0 | 3 | 2 | 12399.4242 | -0.0001 |
| 3 | 1 | 2 | 0 | 3 | 3 | 3 | 0 | 3 | 0 | 3 | 3 | 12399.4287 | -0.0002 |
| 3 | 1 | 2 | 0 | 4 | 3 | 3 | 0 | 3 | 0 | 4 | 3 | 12400.5528 | 0.0006  |
| 3 | 1 | 2 | 0 | 4 | 4 | 3 | 0 | 3 | 0 | 4 | 4 | 12400.5567 | -0.0004 |
| 3 | 1 | 2 | 0 | 3 | 2 | 3 | 0 | 3 | 0 | 4 | 3 | 12405.7118 | -0.0017 |
| 3 | 1 | 2 | 0 | 3 | 3 | 3 | 0 | 3 | 0 | 4 | 4 | 12405.7118 | -0.0056 |

Table S4: Observed Transition Frequencies (in MHz) for CH<sub>2</sub>C<sup>37</sup>ClF

|   |   |   |   |   |   |   |   |   |   |   |   |            |         |
|---|---|---|---|---|---|---|---|---|---|---|---|------------|---------|
| 3 | 1 | 2 | 0 | 2 | 1 | 3 | 0 | 3 | 0 | 3 | 2 | 12410.4781 | -0.0030 |
| 3 | 1 | 2 | 0 | 2 | 2 | 3 | 0 | 3 | 0 | 3 | 3 | 12410.4850 | -0.0026 |
| 3 | 1 | 2 | 0 | 5 | 4 | 3 | 0 | 3 | 0 | 4 | 3 | 12411.6111 | 0.0063  |
| 3 | 1 | 2 | 0 | 5 | 5 | 3 | 0 | 3 | 0 | 4 | 4 | 12411.6182 | 0.0067  |
| 1 | 1 | 1 | 0 | 1 | 1 | 0 | 0 | 0 | 0 | 2 | 2 | 14054.2100 | -0.0016 |
| 1 | 1 | 1 | 0 | 1 | 0 | 0 | 0 | 0 | 0 | 2 | 1 | 14054.2150 | -0.0030 |
| 1 | 1 | 1 | 0 | 3 | 2 | 0 | 0 | 0 | 0 | 2 | 1 | 14060.3018 | 0.0007  |
| 1 | 1 | 1 | 0 | 3 | 3 | 0 | 0 | 0 | 0 | 2 | 2 | 14060.3132 | 0.0006  |
| 1 | 1 | 1 | 0 | 2 | 1 | 0 | 0 | 0 | 0 | 2 | 1 | 14067.9213 | -0.0008 |
| 1 | 1 | 1 | 0 | 2 | 2 | 0 | 0 | 0 | 0 | 2 | 2 | 14067.9273 | 0.0001  |
| 2 | 1 | 2 | 0 | 3 | 2 | 1 | 1 | 1 | 0 | 2 | 1 | 15085.8563 | -0.0005 |
| 2 | 1 | 2 | 0 | 3 | 3 | 1 | 1 | 1 | 0 | 2 | 2 | 15085.8643 | 0.0008  |
| 2 | 1 | 2 | 0 | 2 | 1 | 1 | 1 | 1 | 0 | 2 | 1 | 15090.6907 | 0.0034  |
| 2 | 1 | 2 | 0 | 2 | 2 | 1 | 1 | 1 | 0 | 2 | 2 | 15090.6907 | -0.0015 |
| 2 | 1 | 2 | 0 | 3 | 2 | 1 | 1 | 1 | 0 | 3 | 2 | 15093.4774 | -0.0004 |
| 2 | 1 | 2 | 0 | 3 | 3 | 1 | 1 | 1 | 0 | 3 | 3 | 15093.4774 | -0.0007 |
| 2 | 1 | 2 | 0 | 1 | 0 | 1 | 1 | 1 | 0 | 2 | 1 | 15097.4429 | -0.0024 |
| 2 | 1 | 2 | 0 | 1 | 1 | 1 | 1 | 1 | 0 | 2 | 2 | 15097.4497 | -0.0030 |
| 2 | 1 | 2 | 0 | 2 | 2 | 1 | 1 | 1 | 0 | 3 | 3 | 15098.3044 | -0.0024 |
| 2 | 1 | 2 | 0 | 2 | 1 | 1 | 1 | 1 | 0 | 3 | 2 | 15098.3044 | -0.0039 |
| 2 | 1 | 2 | 0 | 4 | 3 | 1 | 1 | 1 | 0 | 3 | 2 | 15100.2289 | 0.0035  |
| 2 | 1 | 2 | 0 | 4 | 4 | 1 | 1 | 1 | 0 | 3 | 3 | 15100.2325 | 0.0043  |
| 2 | 1 | 2 | 0 | 2 | 1 | 1 | 1 | 1 | 0 | 1 | 0 | 15104.3928 | 0.0014  |
| 2 | 1 | 2 | 0 | 2 | 1 | 1 | 1 | 1 | 0 | 1 | 1 | 15104.4008 | 0.0030  |
| 2 | 1 | 2 | 0 | 2 | 2 | 1 | 1 | 1 | 0 | 1 | 1 | 15104.4086 | 0.0008  |
| 2 | 1 | 2 | 0 | 1 | 0 | 1 | 1 | 1 | 0 | 1 | 1 | 15111.1557 | -0.0002 |
| 2 | 1 | 2 | 0 | 1 | 1 | 1 | 1 | 1 | 0 | 1 | 0 | 15111.1612 | -0.0008 |
| 2 | 1 | 2 | 0 | 1 | 1 | 1 | 1 | 1 | 0 | 1 | 1 | 15111.1675 | -0.0009 |
| 4 | 1 | 3 | 0 | 5 | 4 | 4 | 1 | 4 | 0 | 5 | 4 | 15524.5819 | 0.0016  |
| 4 | 1 | 3 | 0 | 5 | 5 | 4 | 1 | 4 | 0 | 5 | 5 | 15524.5842 | -0.0010 |
| 4 | 1 | 3 | 0 | 4 | 3 | 4 | 1 | 4 | 0 | 4 | 3 | 15524.8201 | 0.0018  |
| 4 | 1 | 3 | 0 | 4 | 4 | 4 | 1 | 4 | 0 | 4 | 4 | 15524.8201 | -0.0030 |
| 4 | 1 | 3 | 0 | 6 | 5 | 4 | 1 | 4 | 0 | 6 | 5 | 15525.2651 | 0.0024  |
| 4 | 1 | 3 | 0 | 6 | 6 | 4 | 1 | 4 | 0 | 6 | 6 | 15525.2694 | 0.0015  |
| 4 | 1 | 3 | 0 | 3 | 2 | 4 | 1 | 4 | 0 | 3 | 2 | 15525.5015 | 0.0016  |
| 4 | 1 | 3 | 0 | 3 | 3 | 4 | 1 | 4 | 0 | 3 | 3 | 15525.5015 | -0.0035 |
| 4 | 2 | 2 | 0 | 4 | 3 | 4 | 1 | 3 | 0 | 3 | 2 | 16059.8215 | 0.0043  |
| 4 | 2 | 2 | 0 | 4 | 4 | 4 | 1 | 3 | 0 | 3 | 3 | 16059.8247 | 0.0039  |
| 4 | 2 | 2 | 0 | 5 | 4 | 4 | 1 | 3 | 0 | 6 | 5 | 16061.6506 | -0.0059 |
| 4 | 2 | 2 | 0 | 5 | 5 | 4 | 1 | 3 | 0 | 6 | 6 | 16061.6506 | -0.0096 |
| 4 | 2 | 2 | 0 | 3 | 2 | 4 | 1 | 3 | 0 | 3 | 2 | 16066.8137 | 0.0004  |
| 4 | 2 | 2 | 0 | 3 | 3 | 4 | 1 | 3 | 0 | 3 | 3 | 16066.8192 | 0.0006  |
| 4 | 2 | 2 | 0 | 6 | 5 | 4 | 1 | 3 | 0 | 6 | 5 | 16068.6441 | -0.0005 |
| 4 | 2 | 2 | 0 | 6 | 6 | 4 | 1 | 3 | 0 | 6 | 6 | 16068.6492 | -0.0008 |

Table S4: Observed Transition Frequencies (in MHz) for CH<sub>2</sub>C<sup>37</sup>ClF

|   |   |   |   |   |   |   |   |   |   |   |   |            |         |
|---|---|---|---|---|---|---|---|---|---|---|---|------------|---------|
| 4 | 2 | 2 | 0 | 5 | 4 | 4 | 1 | 3 | 0 | 4 | 3 | 16069.5940 | 0.0049  |
| 4 | 2 | 2 | 0 | 5 | 5 | 4 | 1 | 3 | 0 | 4 | 4 | 16069.6002 | 0.0055  |
| 4 | 2 | 2 | 0 | 4 | 3 | 4 | 1 | 3 | 0 | 4 | 3 | 16072.0396 | 0.0001  |
| 4 | 2 | 2 | 0 | 4 | 4 | 4 | 1 | 3 | 0 | 4 | 4 | 16072.0450 | 0.0004  |
| 4 | 2 | 2 | 0 | 5 | 4 | 4 | 1 | 3 | 0 | 5 | 4 | 16073.8766 | -0.0003 |
| 4 | 2 | 2 | 0 | 5 | 5 | 4 | 1 | 3 | 0 | 5 | 5 | 16073.8817 | -0.0003 |
| 4 | 2 | 2 | 0 | 4 | 3 | 4 | 1 | 3 | 0 | 5 | 4 | 16076.3218 | -0.0055 |
| 4 | 2 | 2 | 0 | 4 | 4 | 4 | 1 | 3 | 0 | 5 | 5 | 16076.3266 | -0.0053 |
| 4 | 2 | 2 | 0 | 3 | 2 | 4 | 1 | 3 | 0 | 4 | 3 | 16079.0325 | -0.0031 |
| 4 | 2 | 2 | 0 | 3 | 3 | 4 | 1 | 3 | 0 | 4 | 4 | 16079.0390 | -0.0033 |
| 4 | 2 | 2 | 0 | 6 | 5 | 4 | 1 | 3 | 0 | 5 | 4 | 16080.8722 | 0.0072  |
| 4 | 2 | 2 | 0 | 6 | 6 | 4 | 1 | 3 | 0 | 5 | 5 | 16080.8790 | 0.0072  |
| 3 | 2 | 1 | 0 | 3 | 2 | 3 | 1 | 2 | 0 | 2 | 1 | 16359.3050 | 0.0029  |
| 3 | 2 | 1 | 0 | 3 | 3 | 3 | 1 | 2 | 0 | 2 | 2 | 16359.3096 | 0.0030  |
| 3 | 2 | 1 | 0 | 2 | 1 | 3 | 1 | 2 | 0 | 2 | 1 | 16360.2233 | 0.0000  |
| 3 | 2 | 1 | 0 | 2 | 2 | 3 | 1 | 2 | 0 | 2 | 2 | 16360.2307 | 0.0006  |
| 3 | 2 | 1 | 0 | 4 | 3 | 3 | 1 | 2 | 0 | 5 | 4 | 16364.0400 | -0.0058 |
| 3 | 2 | 1 | 0 | 4 | 4 | 3 | 1 | 2 | 0 | 5 | 5 | 16364.0441 | -0.0063 |
| 3 | 2 | 1 | 0 | 5 | 4 | 3 | 1 | 2 | 0 | 5 | 4 | 16364.9513 | -0.0007 |
| 3 | 2 | 1 | 0 | 5 | 5 | 3 | 1 | 2 | 0 | 5 | 5 | 16364.9577 | -0.0012 |
| 3 | 2 | 1 | 0 | 4 | 3 | 3 | 1 | 2 | 0 | 3 | 2 | 16369.9408 | 0.0037  |
| 3 | 2 | 1 | 0 | 4 | 4 | 3 | 1 | 2 | 0 | 3 | 3 | 16369.9486 | 0.0042  |
| 3 | 2 | 1 | 0 | 3 | 2 | 3 | 1 | 2 | 0 | 3 | 2 | 16370.3592 | 0.0003  |
| 3 | 2 | 1 | 0 | 3 | 3 | 3 | 1 | 2 | 0 | 3 | 3 | 16370.3661 | 0.0008  |
| 3 | 2 | 1 | 0 | 2 | 1 | 3 | 1 | 2 | 0 | 3 | 2 | 16371.2785 | -0.0017 |
| 3 | 2 | 1 | 0 | 2 | 2 | 3 | 1 | 2 | 0 | 3 | 3 | 16371.2872 | -0.0016 |
| 3 | 2 | 1 | 0 | 4 | 3 | 3 | 1 | 2 | 0 | 4 | 3 | 16375.0977 | -0.0006 |
| 3 | 2 | 1 | 0 | 4 | 4 | 3 | 1 | 2 | 0 | 4 | 4 | 16375.1045 | -0.0003 |
| 3 | 2 | 1 | 0 | 3 | 2 | 3 | 1 | 2 | 0 | 4 | 3 | 16375.5165 | -0.0037 |
| 3 | 2 | 1 | 0 | 3 | 3 | 3 | 1 | 2 | 0 | 4 | 4 | 16375.5222 | -0.0035 |
| 3 | 2 | 1 | 0 | 5 | 4 | 3 | 1 | 2 | 0 | 4 | 3 | 16376.0096 | 0.0051  |
| 3 | 2 | 1 | 0 | 5 | 5 | 3 | 1 | 2 | 0 | 4 | 4 | 16376.0181 | 0.0047  |
| 2 | 0 | 2 | 0 | 2 | 1 | 1 | 0 | 1 | 0 | 1 | 0 | 16374.6543 | 0.0003  |
| 2 | 0 | 2 | 0 | 2 | 1 | 1 | 0 | 1 | 0 | 1 | 1 | 16374.6609 | 0.0034  |
| 2 | 0 | 2 | 0 | 2 | 2 | 1 | 0 | 1 | 0 | 1 | 1 | 16374.6671 | 0.0014  |
| 2 | 0 | 2 | 0 | 3 | 2 | 1 | 0 | 1 | 0 | 3 | 2 | 16376.1786 | 0.0016  |
| 2 | 0 | 2 | 0 | 3 | 3 | 1 | 0 | 1 | 0 | 3 | 3 | 16376.1786 | -0.0019 |
| 2 | 0 | 2 | 0 | 2 | 1 | 1 | 0 | 1 | 0 | 3 | 2 | 16386.1617 | -0.0027 |
| 2 | 0 | 2 | 0 | 2 | 2 | 1 | 0 | 1 | 0 | 3 | 3 | 16386.1617 | -0.0047 |
| 2 | 0 | 2 | 0 | 1 | 0 | 1 | 0 | 1 | 0 | 1 | 1 | 16388.6131 | -0.0003 |
| 2 | 0 | 2 | 0 | 1 | 1 | 1 | 0 | 1 | 0 | 1 | 0 | 16388.6195 | -0.0006 |
| 2 | 0 | 2 | 0 | 1 | 1 | 1 | 0 | 1 | 0 | 1 | 1 | 16388.6232 | -0.0004 |
| 2 | 0 | 2 | 0 | 4 | 3 | 1 | 0 | 1 | 0 | 3 | 2 | 16390.1446 | 0.0027  |
| 2 | 0 | 2 | 0 | 4 | 4 | 1 | 0 | 1 | 0 | 3 | 3 | 16390.1511 | 0.0038  |

Table S4: Observed Transition Frequencies (in MHz) for CH<sub>2</sub>C<sup>37</sup>ClF

|   |   |   |   |    |   |   |   |   |   |    |   |            |         |
|---|---|---|---|----|---|---|---|---|---|----|---|------------|---------|
| 2 | 0 | 2 | 0 | 2  | 1 | 1 | 0 | 1 | 0 | 2  | 1 | 16400.5338 | 0.0002  |
| 2 | 0 | 2 | 0 | 2  | 2 | 1 | 0 | 1 | 0 | 2  | 2 | 16400.5392 | 0.0001  |
| 2 | 0 | 2 | 1 | 26 | 1 | 1 | 0 | 1 | 1 | 16 | 1 | 16414.4854 | -0.0002 |
| 2 | 0 | 2 | 1 | 29 | 0 | 1 | 0 | 1 | 1 | 14 | 1 | 16414.4888 | -0.0007 |
| 2 | 0 | 2 | 1 | 25 | 1 | 1 | 0 | 1 | 1 | 9  | 2 | 16414.4960 | 0.0021  |
| 2 | 0 | 2 | 1 | 23 | 1 | 1 | 0 | 1 | 1 | 7  | 2 | 16414.4960 | -0.0010 |
| 2 | 0 | 2 | 1 | 19 | 2 | 1 | 0 | 1 | 1 | 4  | 3 | 16414.4960 | -0.0018 |
| 5 | 2 | 3 | 0 | 4  | 3 | 5 | 1 | 4 | 0 | 4  | 3 | 17124.0472 | 0.0030  |
| 5 | 2 | 3 | 0 | 4  | 4 | 5 | 1 | 4 | 0 | 4  | 4 | 17124.0472 | -0.0017 |
| 5 | 2 | 3 | 0 | 7  | 6 | 5 | 1 | 4 | 0 | 7  | 6 | 17124.7726 | -0.0003 |
| 5 | 2 | 3 | 0 | 7  | 7 | 5 | 1 | 4 | 0 | 7  | 7 | 17124.7776 | 0.0000  |
| 5 | 2 | 3 | 0 | 5  | 4 | 5 | 1 | 4 | 0 | 5  | 4 | 17126.6401 | -0.0006 |
| 5 | 2 | 3 | 0 | 5  | 5 | 5 | 1 | 4 | 0 | 5  | 5 | 17126.6440 | -0.0012 |
| 5 | 2 | 3 | 0 | 6  | 5 | 5 | 1 | 4 | 0 | 6  | 5 | 17127.3776 | -0.0010 |
| 5 | 2 | 3 | 0 | 6  | 6 | 5 | 1 | 4 | 0 | 6  | 6 | 17127.3821 | -0.0011 |
| 4 | 1 | 3 | 0 | 4  | 3 | 4 | 0 | 4 | 0 | 3  | 2 | 17270.6039 | 0.0049  |
| 4 | 1 | 3 | 0 | 4  | 4 | 4 | 0 | 4 | 0 | 3  | 3 | 17270.6039 | 0.0006  |
| 4 | 1 | 3 | 0 | 5  | 4 | 4 | 0 | 4 | 0 | 6  | 5 | 17270.8838 | -0.0050 |
| 4 | 1 | 3 | 0 | 5  | 5 | 4 | 0 | 4 | 0 | 6  | 6 | 17270.8838 | -0.0094 |
| 4 | 1 | 3 | 0 | 5  | 4 | 4 | 0 | 4 | 0 | 4  | 3 | 17279.3482 | 0.0049  |
| 4 | 1 | 3 | 0 | 5  | 5 | 4 | 0 | 4 | 0 | 4  | 4 | 17279.3537 | 0.0045  |
| 4 | 1 | 3 | 0 | 3  | 2 | 4 | 0 | 4 | 0 | 3  | 2 | 17282.8250 | 0.0036  |
| 4 | 1 | 3 | 0 | 3  | 3 | 4 | 0 | 4 | 0 | 3  | 3 | 17282.8250 | -0.0020 |
| 4 | 1 | 3 | 1 | 12 | 4 | 4 | 0 | 4 | 1 | 12 | 4 | 17283.1035 | -0.0035 |
| 4 | 1 | 3 | 1 | 3  | 6 | 4 | 0 | 4 | 1 | 3  | 6 | 17283.1035 | -0.0045 |
| 4 | 1 | 3 | 1 | 6  | 5 | 4 | 0 | 4 | 1 | 6  | 5 | 17283.1035 | -0.0057 |
| 4 | 1 | 3 | 1 | 0  | 7 | 4 | 0 | 4 | 1 | 0  | 7 | 17283.1112 | -0.0024 |
| 4 | 1 | 3 | 1 | 1  | 6 | 4 | 0 | 4 | 1 | 1  | 6 | 17283.1112 | -0.0038 |
| 4 | 1 | 3 | 1 | 2  | 6 | 4 | 0 | 4 | 1 | 2  | 6 | 17283.1148 | -0.0035 |
| 4 | 1 | 3 | 0 | 4  | 3 | 4 | 0 | 4 | 0 | 4  | 3 | 17283.6308 | -0.0003 |
| 4 | 1 | 3 | 0 | 4  | 4 | 4 | 0 | 4 | 0 | 4  | 4 | 17283.6349 | -0.0016 |
| 4 | 1 | 3 | 0 | 5  | 4 | 4 | 0 | 4 | 0 | 5  | 4 | 17283.9154 | 0.0007  |
| 4 | 1 | 3 | 0 | 5  | 5 | 4 | 0 | 4 | 0 | 5  | 5 | 17283.9189 | -0.0013 |
| 4 | 1 | 3 | 0 | 4  | 3 | 4 | 0 | 4 | 0 | 5  | 4 | 17288.1999 | -0.0026 |
| 4 | 1 | 3 | 0 | 4  | 4 | 4 | 0 | 4 | 0 | 5  | 5 | 17288.1999 | -0.0076 |
| 4 | 1 | 3 | 0 | 3  | 2 | 4 | 0 | 4 | 0 | 4  | 3 | 17295.8492 | -0.0043 |
| 4 | 1 | 3 | 0 | 3  | 3 | 4 | 0 | 4 | 0 | 4  | 4 | 17295.8560 | -0.0042 |
| 4 | 1 | 3 | 0 | 6  | 5 | 4 | 0 | 4 | 0 | 5  | 4 | 17296.1419 | 0.0068  |
| 4 | 1 | 3 | 0 | 6  | 6 | 4 | 0 | 4 | 0 | 5  | 5 | 17296.1498 | 0.0079  |
| 2 | 2 | 0 | 0 | 1  | 0 | 2 | 1 | 1 | 0 | 1  | 1 | 17438.9494 | 0.0025  |
| 2 | 2 | 0 | 0 | 1  | 1 | 2 | 1 | 1 | 0 | 1  | 1 | 17438.9708 | 0.0001  |
| 2 | 2 | 0 | 0 | 1  | 1 | 2 | 1 | 1 | 0 | 1  | 0 | 17438.9845 | -0.0012 |
| 2 | 2 | 0 | 0 | 1  | 0 | 2 | 1 | 1 | 0 | 2  | 1 | 17446.5819 | -0.0004 |
| 2 | 2 | 0 | 0 | 1  | 1 | 2 | 1 | 1 | 0 | 2  | 2 | 17446.5933 | -0.0009 |

Table S4: Observed Transition Frequencies (in MHz) for CH<sub>2</sub>C<sup>37</sup>ClF

|   |   |   |   |    |   |   |   |   |   |    |   |            |         |
|---|---|---|---|----|---|---|---|---|---|----|---|------------|---------|
| 2 | 2 | 0 | 0 | 2  | 1 | 2 | 1 | 1 | 0 | 1  | 0 | 17452.9276 | 0.0014  |
| 2 | 2 | 0 | 0 | 2  | 2 | 2 | 1 | 1 | 0 | 1  | 1 | 17452.9323 | 0.0019  |
| 2 | 2 | 0 | 1 | 12 | 2 | 2 | 1 | 1 | 1 | 12 | 2 | 17454.3821 | -0.0012 |
| 2 | 2 | 0 | 1 | 3  | 4 | 2 | 1 | 1 | 1 | 3  | 4 | 17454.3857 | 0.0003  |
| 2 | 2 | 0 | 1 | 6  | 3 | 2 | 1 | 1 | 1 | 6  | 3 | 17454.3857 | -0.0013 |
| 2 | 2 | 0 | 1 | 0  | 5 | 2 | 1 | 1 | 1 | 0  | 5 | 17454.3945 | -0.0010 |
| 2 | 2 | 0 | 1 | 1  | 4 | 2 | 1 | 1 | 1 | 1  | 4 | 17454.3945 | -0.0027 |
| 2 | 2 | 0 | 1 | 2  | 4 | 2 | 1 | 1 | 1 | 2  | 4 | 17454.3999 | -0.0020 |
| 2 | 2 | 0 | 0 | 2  | 1 | 2 | 1 | 1 | 0 | 2  | 1 | 17460.5467 | 0.0000  |
| 2 | 2 | 0 | 0 | 2  | 2 | 2 | 1 | 1 | 0 | 2  | 2 | 17460.5546 | 0.0008  |
| 2 | 2 | 0 | 0 | 4  | 3 | 2 | 1 | 1 | 0 | 3  | 2 | 17462.0005 | 0.0030  |
| 2 | 2 | 0 | 0 | 4  | 4 | 2 | 1 | 1 | 0 | 3  | 3 | 17462.0126 | 0.0019  |
| 2 | 2 | 0 | 0 | 2  | 1 | 2 | 1 | 1 | 0 | 3  | 2 | 17465.9868 | -0.0022 |
| 2 | 2 | 0 | 0 | 2  | 2 | 2 | 1 | 1 | 0 | 3  | 3 | 17465.9924 | -0.0016 |
| 2 | 2 | 0 | 0 | 3  | 2 | 2 | 1 | 1 | 0 | 4  | 3 | 17468.3551 | -0.0042 |
| 2 | 2 | 0 | 0 | 3  | 3 | 2 | 1 | 1 | 0 | 4  | 4 | 17468.3606 | -0.0041 |
| 2 | 2 | 0 | 0 | 3  | 2 | 2 | 1 | 1 | 0 | 2  | 1 | 17470.5307 | 0.0032  |
| 2 | 2 | 0 | 0 | 3  | 3 | 2 | 1 | 1 | 0 | 2  | 2 | 17470.5409 | 0.0029  |
| 2 | 2 | 0 | 0 | 3  | 2 | 2 | 1 | 1 | 0 | 3  | 2 | 17475.9697 | -0.0001 |
| 2 | 2 | 0 | 0 | 3  | 3 | 2 | 1 | 1 | 0 | 3  | 3 | 17475.9786 | 0.0004  |
| 2 | 1 | 1 | 0 | 3  | 2 | 1 | 1 | 0 | 0 | 2  | 1 | 18235.3273 | 0.0024  |
| 2 | 1 | 1 | 0 | 3  | 3 | 1 | 1 | 0 | 0 | 2  | 2 | 18235.3346 | 0.0014  |
| 2 | 1 | 1 | 0 | 2  | 1 | 1 | 1 | 0 | 0 | 2  | 1 | 18240.7671 | -0.0001 |
| 2 | 1 | 1 | 0 | 2  | 2 | 1 | 1 | 0 | 0 | 2  | 2 | 18240.7721 | -0.0013 |
| 2 | 1 | 1 | 0 | 3  | 2 | 1 | 1 | 0 | 0 | 3  | 2 | 18242.0834 | 0.0004  |
| 2 | 1 | 1 | 0 | 3  | 3 | 1 | 1 | 0 | 0 | 3  | 3 | 18242.0834 | -0.0008 |
| 2 | 1 | 1 | 0 | 2  | 2 | 1 | 1 | 0 | 0 | 3  | 3 | 18247.5216 | -0.0028 |
| 2 | 1 | 1 | 0 | 2  | 1 | 1 | 1 | 0 | 0 | 3  | 2 | 18247.5216 | -0.0038 |
| 2 | 1 | 1 | 0 | 1  | 0 | 1 | 1 | 0 | 0 | 2  | 1 | 18248.3856 | -0.0021 |
| 2 | 1 | 1 | 0 | 1  | 1 | 1 | 1 | 0 | 0 | 2  | 2 | 18248.3941 | -0.0027 |
| 2 | 1 | 1 | 0 | 4  | 3 | 1 | 1 | 0 | 0 | 3  | 2 | 18249.6969 | 0.0033  |
| 2 | 1 | 1 | 0 | 4  | 4 | 1 | 1 | 0 | 0 | 3  | 3 | 18249.7025 | 0.0048  |
| 2 | 1 | 1 | 0 | 2  | 1 | 1 | 1 | 0 | 0 | 1  | 0 | 18252.9228 | 0.0018  |
| 2 | 1 | 1 | 0 | 2  | 1 | 1 | 1 | 0 | 0 | 1  | 1 | 18252.9296 | 0.0014  |
| 2 | 1 | 1 | 0 | 2  | 2 | 1 | 1 | 0 | 0 | 1  | 1 | 18252.9408 | 0.0006  |
| 2 | 1 | 1 | 0 | 1  | 0 | 1 | 1 | 0 | 0 | 1  | 1 | 18260.5485 | -0.0002 |
| 2 | 1 | 1 | 0 | 1  | 1 | 1 | 1 | 0 | 0 | 1  | 0 | 18260.5554 | -0.0010 |
| 2 | 1 | 1 | 0 | 1  | 1 | 1 | 1 | 0 | 0 | 1  | 1 | 18260.5630 | -0.0006 |
| 3 | 0 | 3 | 0 | 4  | 3 | 2 | 1 | 2 | 0 | 4  | 3 | 19487.9685 | -0.0008 |
| 3 | 0 | 3 | 0 | 4  | 4 | 2 | 1 | 2 | 0 | 4  | 4 | 19487.9685 | -0.0018 |
| 3 | 0 | 3 | 0 | 3  | 2 | 2 | 1 | 2 | 0 | 4  | 3 | 19494.2540 | -0.0045 |
| 3 | 0 | 3 | 0 | 3  | 3 | 2 | 1 | 2 | 0 | 4  | 4 | 19494.2540 | -0.0048 |
| 3 | 0 | 3 | 0 | 4  | 3 | 2 | 1 | 2 | 0 | 3  | 2 | 19494.7194 | 0.0025  |
| 3 | 0 | 3 | 0 | 4  | 4 | 2 | 1 | 2 | 0 | 3  | 3 | 19494.7240 | 0.0036  |

Table S4: Observed Transition Frequencies (in MHz) for CH<sub>2</sub>C<sup>37</sup>ClF

|   |   |   |   |    |   |   |   |   |   |    |   |            |         |
|---|---|---|---|----|---|---|---|---|---|----|---|------------|---------|
| 3 | 0 | 3 | 0 | 3  | 2 | 2 | 1 | 2 | 0 | 2  | 1 | 19496.1758 | 0.0002  |
| 3 | 0 | 3 | 0 | 3  | 3 | 2 | 1 | 2 | 0 | 2  | 2 | 19496.1820 | 0.0018  |
| 3 | 0 | 3 | 0 | 3  | 2 | 2 | 1 | 2 | 0 | 3  | 2 | 19501.0070 | 0.0009  |
| 3 | 0 | 3 | 0 | 3  | 3 | 2 | 1 | 2 | 0 | 3  | 3 | 19501.0070 | -0.0020 |
| 3 | 0 | 3 | 0 | 5  | 4 | 2 | 1 | 2 | 0 | 4  | 3 | 19501.4366 | 0.0059  |
| 3 | 0 | 3 | 0 | 5  | 5 | 2 | 1 | 2 | 0 | 4  | 4 | 19501.4366 | 0.0035  |
| 3 | 0 | 3 | 0 | 2  | 2 | 2 | 1 | 2 | 0 | 1  | 1 | 19502.8738 | 0.0003  |
| 3 | 0 | 3 | 0 | 2  | 1 | 2 | 1 | 2 | 0 | 2  | 1 | 19509.6256 | -0.0024 |
| 3 | 0 | 3 | 0 | 2  | 2 | 2 | 1 | 2 | 0 | 2  | 2 | 19509.6331 | -0.0009 |
| 3 | 0 | 3 | 0 | 2  | 1 | 2 | 1 | 2 | 0 | 3  | 2 | 19514.4549 | -0.0036 |
| 3 | 0 | 3 | 0 | 2  | 2 | 2 | 1 | 2 | 0 | 3  | 3 | 19514.4589 | -0.0039 |
| 4 | 1 | 3 | 0 | 5  | 5 | 3 | 2 | 2 | 0 | 4  | 4 | 20802.3437 | 0.0011  |
| 4 | 1 | 3 | 0 | 5  | 4 | 3 | 2 | 2 | 0 | 4  | 3 | 20802.3494 | 0.0022  |
| 4 | 1 | 3 | 0 | 4  | 4 | 3 | 2 | 2 | 0 | 3  | 3 | 20806.6364 | -0.0007 |
| 4 | 1 | 3 | 0 | 4  | 3 | 3 | 2 | 2 | 0 | 3  | 2 | 20806.6419 | 0.0002  |
| 4 | 1 | 3 | 0 | 6  | 6 | 3 | 2 | 2 | 0 | 5  | 5 | 20814.5788 | 0.0057  |
| 4 | 1 | 3 | 0 | 6  | 5 | 3 | 2 | 2 | 0 | 5  | 4 | 20814.5788 | 0.0034  |
| 4 | 1 | 3 | 0 | 3  | 3 | 3 | 2 | 2 | 0 | 2  | 2 | 20818.8467 | -0.0011 |
| 4 | 1 | 3 | 0 | 3  | 2 | 3 | 2 | 2 | 0 | 2  | 1 | 20818.8467 | -0.0034 |
| 2 | 1 | 2 | 0 | 2  | 1 | 1 | 0 | 1 | 0 | 1  | 0 | 20808.4650 | 0.0001  |
| 2 | 1 | 2 | 0 | 2  | 1 | 1 | 0 | 1 | 0 | 1  | 1 | 20808.4713 | 0.0029  |
| 2 | 1 | 2 | 0 | 2  | 2 | 1 | 0 | 1 | 0 | 1  | 1 | 20808.4797 | 0.0013  |
| 2 | 1 | 2 | 0 | 3  | 2 | 1 | 0 | 1 | 0 | 3  | 2 | 20815.1434 | -0.0015 |
| 2 | 1 | 2 | 0 | 3  | 3 | 1 | 0 | 1 | 0 | 3  | 3 | 20815.1489 | -0.0015 |
| 2 | 1 | 2 | 0 | 1  | 0 | 1 | 0 | 1 | 0 | 1  | 1 | 20815.2265 | 0.0001  |
| 2 | 1 | 2 | 0 | 1  | 1 | 1 | 0 | 1 | 0 | 1  | 1 | 20815.2384 | -0.0006 |
| 2 | 1 | 2 | 0 | 2  | 1 | 1 | 0 | 1 | 0 | 3  | 2 | 20819.9737 | -0.0016 |
| 2 | 1 | 2 | 0 | 2  | 2 | 1 | 0 | 1 | 0 | 3  | 3 | 20819.9737 | -0.0055 |
| 2 | 1 | 2 | 0 | 4  | 3 | 1 | 0 | 1 | 0 | 3  | 2 | 20821.8940 | 0.0015  |
| 2 | 1 | 2 | 0 | 4  | 4 | 1 | 0 | 1 | 0 | 3  | 3 | 20821.9029 | 0.0024  |
| 2 | 1 | 2 | 0 | 3  | 2 | 1 | 0 | 1 | 0 | 2  | 1 | 20829.5167 | 0.0026  |
| 2 | 1 | 2 | 0 | 3  | 3 | 1 | 0 | 1 | 0 | 2  | 2 | 20829.5261 | 0.0030  |
| 2 | 1 | 2 | 0 | 2  | 1 | 1 | 0 | 1 | 0 | 2  | 1 | 20834.3442 | -0.0004 |
| 2 | 1 | 2 | 0 | 2  | 2 | 1 | 0 | 1 | 0 | 2  | 2 | 20834.3519 | 0.0001  |
| 2 | 1 | 2 | 1 | 26 | 1 | 1 | 0 | 1 | 1 | 16 | 1 | 20841.0987 | 0.0000  |
| 2 | 1 | 2 | 1 | 26 | 1 | 1 | 0 | 1 | 1 | 10 | 2 | 20841.1015 | -0.0017 |
| 2 | 1 | 2 | 1 | 23 | 1 | 1 | 0 | 1 | 1 | 7  | 2 | 20841.1111 | -0.0013 |
| 2 | 1 | 2 | 1 | 19 | 2 | 1 | 0 | 1 | 1 | 4  | 3 | 20841.1111 | -0.0021 |
| 2 | 2 | 1 | 0 | 1  | 0 | 2 | 1 | 2 | 0 | 1  | 1 | 21881.0435 | 0.0031  |
| 2 | 2 | 1 | 0 | 1  | 1 | 2 | 1 | 2 | 0 | 1  | 1 | 21881.0638 | -0.0004 |
| 2 | 2 | 1 | 0 | 1  | 1 | 2 | 1 | 2 | 0 | 1  | 0 | 21881.0768 | 0.0001  |
| 2 | 2 | 1 | 0 | 1  | 0 | 2 | 1 | 2 | 0 | 2  | 1 | 21887.8070 | -0.0040 |
| 2 | 2 | 1 | 0 | 1  | 1 | 2 | 1 | 2 | 0 | 2  | 2 | 21887.8233 | -0.0014 |
| 2 | 2 | 1 | 0 | 2  | 1 | 2 | 1 | 2 | 0 | 1  | 0 | 21895.4298 | -0.0005 |

Table S4: Observed Transition Frequencies (in MHz) for CH<sub>2</sub>C<sup>37</sup>ClF

|   |   |   |   |   |   |   |   |   |   |   |   |            |         |
|---|---|---|---|---|---|---|---|---|---|---|---|------------|---------|
| 2 | 2 | 1 | 0 | 2 | 2 | 2 | 1 | 2 | 0 | 1 | 1 | 21895.4376 | 0.0009  |
| 2 | 2 | 1 | 1 | 3 | 4 | 2 | 1 | 2 | 1 | 3 | 4 | 21896.1583 | -0.0001 |
| 2 | 2 | 1 | 1 | 6 | 3 | 2 | 1 | 2 | 1 | 6 | 3 | 21896.1583 | -0.0025 |
| 2 | 2 | 1 | 1 | 0 | 5 | 2 | 1 | 2 | 1 | 0 | 5 | 21896.1712 | 0.0003  |
| 2 | 2 | 1 | 1 | 1 | 4 | 2 | 1 | 2 | 1 | 1 | 4 | 21896.1712 | -0.0024 |
| 2 | 2 | 1 | 1 | 2 | 4 | 2 | 1 | 2 | 1 | 2 | 4 | 21896.1821 | 0.0010  |
| 2 | 2 | 1 | 0 | 2 | 1 | 2 | 1 | 2 | 0 | 2 | 1 | 21902.1865 | -0.0018 |
| 2 | 2 | 1 | 0 | 2 | 2 | 2 | 1 | 2 | 0 | 2 | 2 | 21902.1968 | -0.0005 |
| 2 | 2 | 1 | 0 | 2 | 2 | 2 | 1 | 2 | 0 | 2 | 1 | 21902.2089 | 0.0016  |
| 2 | 2 | 1 | 0 | 4 | 3 | 2 | 1 | 2 | 0 | 3 | 2 | 21902.9108 | 0.0024  |
| 2 | 2 | 1 | 0 | 4 | 4 | 2 | 1 | 2 | 0 | 3 | 3 | 21902.9252 | 0.0015  |
| 2 | 2 | 1 | 0 | 2 | 1 | 2 | 1 | 2 | 0 | 3 | 2 | 21907.0150 | -0.0038 |
| 2 | 2 | 1 | 0 | 2 | 2 | 2 | 1 | 2 | 0 | 3 | 3 | 21907.0234 | -0.0026 |
| 2 | 2 | 1 | 0 | 3 | 2 | 2 | 1 | 2 | 0 | 4 | 3 | 21910.5346 | -0.0039 |
| 2 | 2 | 1 | 0 | 3 | 3 | 2 | 1 | 2 | 0 | 4 | 4 | 21910.5432 | -0.0034 |
| 2 | 2 | 1 | 0 | 3 | 2 | 2 | 1 | 2 | 0 | 2 | 1 | 21912.4581 | 0.0025  |
| 2 | 2 | 1 | 0 | 3 | 3 | 2 | 1 | 2 | 0 | 2 | 2 | 21912.4704 | 0.0024  |
| 2 | 2 | 1 | 0 | 3 | 2 | 2 | 1 | 2 | 0 | 3 | 2 | 21917.2858 | -0.0003 |
| 2 | 2 | 1 | 0 | 3 | 3 | 2 | 1 | 2 | 0 | 3 | 3 | 21917.2969 | 0.0002  |

Table S5: Observed Transition Frequencies (in MHz) for CH<sub>2</sub><sup>13</sup>C<sup>37</sup>ClF

| $J'$ | $K_a'$ | $K_c'$ | $s'$ | $m_1'$ | $m_2'$ | $J''$ | $K_a''$ | $K_c''$ | $s''$ | $m_1''$ | $m_2''$ | Observed   | Obs - Calc |
|------|--------|--------|------|--------|--------|-------|---------|---------|-------|---------|---------|------------|------------|
| 1    | 1      | 0      | 0    | 1      | 1      | 1     | 0       | 1       | 0     | 1       | 1       | 7283.2019  | 0.0009     |
| 1    | 1      | 0      | 0    | 2      | 2      | 1     | 0       | 1       | 0     | 1       | 1       | 7295.3768  | 0.0046     |
| 1    | 1      | 0      | 0    | 3      | 3      | 1     | 0       | 1       | 0     | 3       | 3       | 7300.1215  | -0.0046    |
| 1    | 1      | 0      | 0    | 2      | 1      | 1     | 0       | 1       | 0     | 3       | 2       | 7306.8733  | -0.0013    |
| 1    | 1      | 0      | 0    | 2      | 2      | 1     | 0       | 1       | 0     | 3       | 3       | 7306.8733  | -0.0028    |
| 1    | 1      | 0      | 0    | 1      | 1      | 1     | 0       | 1       | 0     | 2       | 2       | 7309.0844  | 0.0014     |
| 1    | 1      | 0      | 0    | 3      | 3      | 1     | 0       | 1       | 0     | 2       | 2       | 7314.5055  | 0.0013     |
| 1    | 1      | 0      | 0    | 2      | 1      | 1     | 0       | 1       | 0     | 2       | 1       | 7321.2536  | 0.0053     |
| 1    | 1      | 0      | 0    | 2      | 2      | 1     | 0       | 1       | 0     | 2       | 2       | 7321.2536  | -0.0006    |
| 1    | 0      | 1      | 0    | 2      | 1      | 0     | 0       | 0       | 0     | 2       | 1       | 8306.3003  | 0.0020     |
| 1    | 0      | 1      | 0    | 2      | 2      | 0     | 0       | 0       | 0     | 2       | 2       | 8306.3003  | -0.0016    |
| 1    | 0      | 1      | 0    | 3      | 3      | 0     | 0       | 0       | 0     | 2       | 2       | 8320.6824  | 0.0024     |
| 1    | 0      | 1      | 0    | 1      | 1      | 0     | 0       | 0       | 0     | 2       | 2       | 8332.1834  | -0.0005    |
| 2    | 1      | 1      | 0    | 2      | 2      | 2     | 0       | 2       | 0     | 1       | 1       | 9138.7876  | 0.0009     |
| 2    | 1      | 1      | 0    | 3      | 2      | 2     | 0       | 2       | 0     | 4       | 3       | 9143.3204  | 0.0017     |
| 2    | 1      | 1      | 0    | 3      | 3      | 2     | 0       | 2       | 0     | 4       | 4       | 9143.3204  | -0.0062    |
| 2    | 1      | 1      | 0    | 1      | 1      | 2     | 0       | 2       | 0     | 1       | 1       | 9146.4135  | -0.0002    |
| 2    | 1      | 1      | 0    | 3      | 3      | 2     | 0       | 2       | 0     | 2       | 2       | 9147.3126  | 0.0023     |
| 2    | 1      | 1      | 0    | 4      | 4      | 2     | 0       | 2       | 0     | 4       | 4       | 9150.9427  | -0.0023    |
| 2    | 1      | 1      | 0    | 2      | 2      | 2     | 0       | 2       | 0     | 2       | 2       | 9152.7517  | -0.0008    |
| 2    | 1      | 1      | 0    | 3      | 3      | 2     | 0       | 2       | 0     | 3       | 3       | 9157.3007  | -0.0011    |
| 2    | 1      | 1      | 0    | 1      | 1      | 2     | 0       | 2       | 0     | 2       | 2       | 9160.3791  | -0.0004    |
| 2    | 1      | 1      | 0    | 2      | 1      | 2     | 0       | 2       | 0     | 3       | 2       | 9162.7407  | 0.0037     |
| 2    | 1      | 1      | 0    | 2      | 2      | 2     | 0       | 2       | 0     | 3       | 3       | 9162.7407  | -0.0033    |
| 2    | 1      | 1      | 0    | 4      | 4      | 2     | 0       | 2       | 0     | 3       | 3       | 9164.9236  | 0.0034     |
| 3    | 1      | 2      | 0    | 4      | 4      | 2     | 2       | 1       | 0     | 3       | 3       | 9887.1293  | 0.0040     |
| 3    | 1      | 2      | 0    | 4      | 3      | 2     | 2       | 1       | 0     | 3       | 2       | 9887.1293  | 0.0001     |
| 3    | 1      | 2      | 0    | 3      | 3      | 2     | 2       | 1       | 0     | 2       | 2       | 9902.5654  | 0.0013     |
| 3    | 1      | 2      | 0    | 3      | 2      | 2     | 2       | 1       | 0     | 2       | 1       | 9902.5654  | 0.0014     |
| 2    | 0      | 2      | 0    | 3      | 3      | 1     | 1       | 1       | 0     | 2       | 2       | 10603.6431 | 0.0017     |
| 2    | 0      | 2      | 0    | 3      | 3      | 1     | 1       | 1       | 0     | 3       | 3       | 10611.2605 | 0.0016     |
| 2    | 0      | 2      | 0    | 3      | 2      | 1     | 1       | 1       | 0     | 3       | 2       | 10611.2605 | -0.0027    |
| 2    | 0      | 2      | 0    | 2      | 1      | 1     | 1       | 1       | 0     | 2       | 1       | 10613.6323 | 0.0023     |
| 2    | 0      | 2      | 0    | 2      | 2      | 1     | 1       | 1       | 0     | 2       | 2       | 10613.6323 | -0.0007    |
| 2    | 0      | 2      | 0    | 2      | 2      | 1     | 1       | 1       | 0     | 3       | 3       | 10621.2464 | -0.0040    |
| 2    | 0      | 2      | 0    | 2      | 1      | 1     | 1       | 1       | 0     | 3       | 2       | 10621.2528 | -0.0037    |
| 2    | 0      | 2      | 0    | 4      | 4      | 1     | 1       | 1       | 0     | 3       | 3       | 10625.2400 | 0.0059     |
| 2    | 0      | 2      | 0    | 4      | 3      | 1     | 1       | 1       | 0     | 3       | 2       | 10625.2400 | 0.0042     |
| 2    | 0      | 2      | 0    | 2      | 1      | 1     | 1       | 1       | 0     | 1       | 0       | 10627.3386 | 0.0004     |
| 2    | 0      | 2      | 0    | 2      | 2      | 1     | 1       | 1       | 0     | 1       | 1       | 10627.3580 | 0.0009     |
| 2    | 0      | 2      | 0    | 1      | 1      | 1     | 1       | 1       | 0     | 2       | 2       | 10627.5972 | -0.0016    |
| 2    | 0      | 2      | 0    | 1      | 0      | 1     | 1       | 1       | 0     | 1       | 1       | 10641.3122 | 0.0017     |
| 2    | 0      | 2      | 0    | 1      | 1      | 1     | 1       | 1       | 0     | 1       | 0       | 10641.3122 | -0.0019    |

Table S5: Observed Transition Frequencies (in MHz) for CH<sub>2</sub><sup>13</sup>C<sup>37</sup>ClF

|   |   |   |   |   |   |   |   |   |   |   |   |            |         |
|---|---|---|---|---|---|---|---|---|---|---|---|------------|---------|
| 2 | 0 | 2 | 0 | 1 | 1 | 1 | 1 | 1 | 0 | 1 | 1 | 10641.3226 | -0.0004 |
| 3 | 1 | 2 | 0 | 3 | 3 | 3 | 0 | 3 | 0 | 2 | 2 | 12364.2946 | 0.0024  |
| 3 | 1 | 2 | 0 | 4 | 3 | 3 | 0 | 3 | 0 | 5 | 4 | 12365.4067 | 0.0049  |
| 3 | 1 | 2 | 0 | 4 | 4 | 3 | 0 | 3 | 0 | 5 | 5 | 12365.4067 | -0.0070 |
| 3 | 1 | 2 | 0 | 4 | 4 | 3 | 0 | 3 | 0 | 3 | 3 | 12372.5971 | 0.0032  |
| 3 | 1 | 2 | 0 | 2 | 2 | 3 | 0 | 3 | 0 | 2 | 2 | 12375.3573 | -0.0001 |
| 3 | 1 | 2 | 0 | 5 | 5 | 3 | 0 | 3 | 0 | 5 | 5 | 12376.4745 | -0.0007 |
| 3 | 1 | 2 | 0 | 3 | 3 | 3 | 0 | 3 | 0 | 3 | 3 | 12377.7562 | -0.0007 |
| 3 | 1 | 2 | 0 | 4 | 4 | 3 | 0 | 3 | 0 | 4 | 4 | 12378.8866 | -0.0008 |
| 3 | 1 | 2 | 0 | 3 | 2 | 3 | 0 | 3 | 0 | 4 | 3 | 12384.0459 | 0.0076  |
| 3 | 1 | 2 | 0 | 3 | 3 | 3 | 0 | 3 | 0 | 4 | 4 | 12384.0459 | -0.0045 |
| 3 | 1 | 2 | 0 | 2 | 1 | 3 | 0 | 3 | 0 | 3 | 2 | 12388.8040 | -0.0023 |
| 3 | 1 | 2 | 0 | 2 | 2 | 3 | 0 | 3 | 0 | 3 | 3 | 12388.8188 | -0.0033 |
| 1 | 1 | 1 | 0 | 1 | 1 | 0 | 0 | 0 | 0 | 2 | 2 | 14046.0571 | -0.0009 |
| 1 | 1 | 1 | 0 | 1 | 0 | 0 | 0 | 0 | 0 | 2 | 1 | 14046.0626 | -0.0044 |
| 1 | 1 | 1 | 0 | 3 | 2 | 0 | 0 | 0 | 0 | 2 | 1 | 14052.1528 | 0.0041  |
| 1 | 1 | 1 | 0 | 3 | 3 | 0 | 0 | 0 | 0 | 2 | 2 | 14052.1683 | 0.0036  |
| 1 | 1 | 1 | 0 | 2 | 1 | 0 | 0 | 0 | 0 | 2 | 1 | 14059.7705 | -0.0046 |
| 1 | 1 | 1 | 0 | 2 | 2 | 0 | 0 | 0 | 0 | 2 | 2 | 14059.7815 | -0.0007 |
| 2 | 1 | 2 | 0 | 3 | 3 | 1 | 1 | 1 | 0 | 2 | 2 | 15056.1776 | -0.0001 |
| 2 | 1 | 2 | 0 | 2 | 1 | 1 | 1 | 1 | 0 | 2 | 1 | 15061.0044 | 0.0022  |
| 2 | 1 | 2 | 0 | 2 | 2 | 1 | 1 | 1 | 0 | 2 | 2 | 15061.0044 | -0.0026 |
| 2 | 1 | 2 | 0 | 3 | 2 | 1 | 1 | 1 | 0 | 3 | 2 | 15063.7941 | -0.0031 |
| 2 | 1 | 2 | 0 | 3 | 3 | 1 | 1 | 1 | 0 | 3 | 3 | 15063.7941 | -0.0010 |
| 2 | 1 | 2 | 0 | 4 | 3 | 1 | 1 | 1 | 0 | 3 | 2 | 15070.5489 | 0.0033  |
| 2 | 1 | 2 | 0 | 4 | 4 | 1 | 1 | 1 | 0 | 3 | 3 | 15070.5489 | 0.0023  |
| 2 | 1 | 2 | 0 | 2 | 2 | 1 | 1 | 1 | 0 | 1 | 1 | 15074.7311 | 0.0000  |
| 2 | 1 | 2 | 0 | 1 | 1 | 1 | 1 | 1 | 0 | 1 | 1 | 15081.4908 | -0.0019 |
| 4 | 2 | 2 | 0 | 6 | 6 | 4 | 1 | 3 | 0 | 6 | 6 | 16084.0669 | -0.0006 |
| 4 | 2 | 2 | 0 | 4 | 4 | 4 | 1 | 3 | 0 | 4 | 4 | 16087.4694 | -0.0010 |
| 4 | 2 | 2 | 0 | 5 | 4 | 4 | 1 | 3 | 0 | 5 | 4 | 16089.3079 | 0.0047  |
| 4 | 2 | 2 | 0 | 5 | 5 | 4 | 1 | 3 | 0 | 5 | 5 | 16089.3079 | -0.0046 |
| 2 | 0 | 2 | 0 | 2 | 1 | 1 | 0 | 1 | 0 | 1 | 0 | 16341.2183 | 0.0014  |
| 2 | 0 | 2 | 0 | 2 | 2 | 1 | 0 | 1 | 0 | 1 | 1 | 16341.2322 | 0.0009  |
| 2 | 0 | 2 | 0 | 3 | 2 | 1 | 0 | 1 | 0 | 3 | 2 | 16342.7410 | 0.0012  |
| 2 | 0 | 2 | 0 | 3 | 3 | 1 | 0 | 1 | 0 | 3 | 3 | 16342.7410 | -0.0026 |
| 2 | 0 | 2 | 0 | 1 | 0 | 1 | 0 | 1 | 0 | 1 | 1 | 16355.1843 | -0.0004 |
| 2 | 0 | 2 | 0 | 1 | 1 | 1 | 0 | 1 | 0 | 1 | 1 | 16355.1952 | -0.0020 |
| 2 | 0 | 2 | 0 | 4 | 3 | 1 | 0 | 1 | 0 | 3 | 2 | 16356.7159 | 0.0034  |
| 2 | 0 | 2 | 0 | 4 | 4 | 1 | 0 | 1 | 0 | 3 | 3 | 16356.7224 | 0.0036  |
| 2 | 0 | 2 | 0 | 3 | 2 | 1 | 0 | 1 | 0 | 2 | 1 | 16357.1159 | 0.0024  |
| 2 | 0 | 2 | 0 | 3 | 3 | 1 | 0 | 1 | 0 | 2 | 2 | 16357.1244 | 0.0026  |
| 2 | 0 | 2 | 0 | 2 | 2 | 1 | 0 | 1 | 0 | 2 | 2 | 16367.1126 | -0.0007 |
| 3 | 2 | 1 | 0 | 2 | 2 | 3 | 1 | 2 | 0 | 2 | 2 | 16385.7068 | 0.0014  |

Table S5: Observed Transition Frequencies (in MHz) for CH<sub>2</sub><sup>13</sup>C<sup>37</sup>ClF

|   |   |   |   |   |   |   |   |   |   |   |   |            |         |
|---|---|---|---|---|---|---|---|---|---|---|---|------------|---------|
| 3 | 2 | 1 | 0 | 3 | 3 | 3 | 1 | 2 | 0 | 3 | 3 | 16395.8559 | 0.0029  |
| 2 | 2 | 0 | 0 | 1 | 1 | 2 | 1 | 1 | 0 | 2 | 2 | 17473.5313 | -0.0030 |
| 2 | 2 | 0 | 0 | 2 | 2 | 2 | 1 | 1 | 0 | 1 | 1 | 17479.8758 | 0.0002  |
| 2 | 2 | 0 | 0 | 4 | 3 | 2 | 1 | 1 | 0 | 4 | 3 | 17481.3271 | -0.0003 |
| 2 | 2 | 0 | 0 | 4 | 4 | 2 | 1 | 1 | 0 | 4 | 4 | 17481.3426 | -0.0011 |
| 2 | 2 | 0 | 0 | 4 | 3 | 2 | 1 | 1 | 0 | 3 | 2 | 17488.9472 | 0.0061  |
| 2 | 2 | 0 | 0 | 4 | 4 | 2 | 1 | 1 | 0 | 3 | 3 | 17488.9641 | 0.0021  |
| 2 | 2 | 0 | 0 | 2 | 1 | 2 | 1 | 1 | 0 | 3 | 2 | 17492.9345 | -0.0024 |
| 2 | 2 | 0 | 0 | 2 | 2 | 2 | 1 | 1 | 0 | 3 | 3 | 17492.9439 | -0.0010 |
| 2 | 2 | 0 | 0 | 3 | 2 | 2 | 1 | 1 | 0 | 4 | 3 | 17495.3053 | -0.0038 |
| 2 | 2 | 0 | 0 | 3 | 3 | 2 | 1 | 1 | 0 | 4 | 4 | 17495.3159 | -0.0019 |
| 2 | 2 | 0 | 0 | 3 | 3 | 2 | 1 | 1 | 0 | 2 | 2 | 17497.4971 | 0.0032  |
| 2 | 2 | 0 | 0 | 3 | 2 | 2 | 1 | 1 | 0 | 3 | 2 | 17502.9247 | 0.0019  |
| 2 | 2 | 0 | 0 | 3 | 3 | 2 | 1 | 1 | 0 | 3 | 3 | 17502.9368 | 0.0007  |
| 2 | 1 | 1 | 0 | 3 | 3 | 1 | 1 | 0 | 0 | 2 | 2 | 18193.1704 | 0.0010  |
| 2 | 1 | 1 | 0 | 2 | 2 | 1 | 1 | 0 | 0 | 2 | 2 | 18198.6084 | -0.0032 |
| 2 | 1 | 1 | 0 | 3 | 2 | 1 | 1 | 0 | 0 | 3 | 2 | 18199.9185 | 0.0001  |
| 2 | 1 | 1 | 0 | 3 | 3 | 1 | 1 | 0 | 0 | 3 | 3 | 18199.9185 | -0.0008 |
| 2 | 1 | 1 | 0 | 4 | 4 | 1 | 1 | 0 | 0 | 3 | 3 | 18207.5412 | 0.0035  |
| 2 | 1 | 1 | 0 | 2 | 2 | 1 | 1 | 0 | 0 | 1 | 1 | 18210.7800 | -0.0029 |
| 2 | 1 | 1 | 0 | 1 | 1 | 1 | 1 | 0 | 0 | 1 | 1 | 18218.4090 | -0.0009 |
| 3 | 0 | 3 | 0 | 4 | 3 | 2 | 1 | 2 | 0 | 4 | 3 | 19429.5092 | -0.0022 |
| 3 | 0 | 3 | 0 | 4 | 4 | 2 | 1 | 2 | 0 | 4 | 4 | 19429.5092 | -0.0027 |
| 3 | 0 | 3 | 0 | 4 | 3 | 2 | 1 | 2 | 0 | 3 | 2 | 19436.2642 | 0.0044  |
| 3 | 0 | 3 | 0 | 4 | 4 | 2 | 1 | 2 | 0 | 3 | 3 | 19436.2642 | 0.0009  |
| 3 | 0 | 3 | 0 | 3 | 2 | 2 | 1 | 2 | 0 | 2 | 1 | 19437.7230 | 0.0003  |
| 3 | 0 | 3 | 0 | 3 | 3 | 2 | 1 | 2 | 0 | 2 | 2 | 19437.7279 | 0.0004  |
| 3 | 0 | 3 | 0 | 3 | 2 | 2 | 1 | 2 | 0 | 3 | 2 | 19442.5529 | -0.0012 |
| 3 | 0 | 3 | 0 | 3 | 3 | 2 | 1 | 2 | 0 | 3 | 3 | 19442.5529 | -0.0039 |
| 3 | 0 | 3 | 0 | 5 | 4 | 2 | 1 | 2 | 0 | 4 | 3 | 19442.9886 | 0.0052  |
| 3 | 0 | 3 | 0 | 5 | 5 | 2 | 1 | 2 | 0 | 4 | 4 | 19442.9886 | 0.0030  |
| 3 | 0 | 3 | 0 | 2 | 2 | 2 | 1 | 2 | 0 | 1 | 1 | 19444.4269 | -0.0038 |
| 3 | 0 | 3 | 0 | 2 | 2 | 2 | 1 | 2 | 0 | 2 | 2 | 19451.1900 | -0.0023 |
| 2 | 1 | 2 | 0 | 2 | 1 | 1 | 0 | 1 | 0 | 1 | 0 | 20788.5870 | -0.0020 |
| 2 | 1 | 2 | 0 | 2 | 2 | 1 | 0 | 1 | 0 | 1 | 1 | 20788.6042 | -0.0011 |
| 2 | 1 | 2 | 0 | 3 | 2 | 1 | 0 | 1 | 0 | 3 | 2 | 20795.2758 | 0.0020  |
| 2 | 1 | 2 | 0 | 3 | 3 | 1 | 0 | 1 | 0 | 3 | 3 | 20795.2758 | -0.0040 |
| 2 | 1 | 2 | 0 | 1 | 0 | 1 | 0 | 1 | 0 | 1 | 1 | 20795.3507 | -0.0013 |
| 2 | 1 | 2 | 0 | 1 | 1 | 1 | 0 | 1 | 0 | 1 | 1 | 20795.3642 | -0.0027 |
| 2 | 1 | 2 | 0 | 4 | 3 | 1 | 0 | 1 | 0 | 3 | 2 | 20802.0206 | -0.0017 |
| 2 | 1 | 2 | 0 | 4 | 4 | 1 | 0 | 1 | 0 | 3 | 3 | 20802.0342 | 0.0029  |
| 2 | 1 | 2 | 0 | 3 | 2 | 1 | 0 | 1 | 0 | 2 | 1 | 20809.6479 | 0.0004  |
| 2 | 1 | 2 | 0 | 3 | 3 | 1 | 0 | 1 | 0 | 2 | 2 | 20809.6605 | 0.0025  |

Table S6: Observed Transition Frequencies (in MHz) for  $^{13}\text{CH}_2\text{C}^{37}\text{ClF}$ 

| $J'$ | $K_a'$ | $K_c'$ | $s'$ | $nm_1'$ | $nm_2'$ | $J''$ | $K_a''$ | $K_c''$ | $s''$ | $nm_1''$ | $nm_2''$ | Observed   | Obs - Calc |
|------|--------|--------|------|---------|---------|-------|---------|---------|-------|----------|----------|------------|------------|
| 1    | 1      | 0      | 0    | 1       | 1       | 1     | 0       | 1       | 0     | 1        | 1        | 7022.2421  | -0.0005    |
| 1    | 1      | 0      | 0    | 2       | 2       | 1     | 0       | 1       | 0     | 1        | 1        | 7034.4118  | 0.0022     |
| 1    | 1      | 0      | 0    | 3       | 2       | 1     | 0       | 1       | 0     | 3        | 2        | 7039.1932  | -0.0007    |
| 1    | 1      | 0      | 0    | 3       | 3       | 1     | 0       | 1       | 0     | 3        | 3        | 7039.2007  | -0.0024    |
| 1    | 1      | 0      | 0    | 2       | 2       | 1     | 0       | 1       | 0     | 3        | 3        | 7045.9496  | -0.0030    |
| 1    | 1      | 0      | 0    | 2       | 1       | 1     | 0       | 1       | 0     | 3        | 2        | 7045.9496  | -0.0030    |
| 1    | 1      | 0      | 0    | 1       | 1       | 1     | 0       | 1       | 0     | 2        | 2        | 7048.2118  | 0.0000     |
| 1    | 1      | 0      | 0    | 3       | 2       | 1     | 0       | 1       | 0     | 2        | 1        | 7053.6204  | 0.0043     |
| 1    | 1      | 0      | 0    | 3       | 3       | 1     | 0       | 1       | 0     | 2        | 2        | 7053.6297  | 0.0004     |
| 1    | 0      | 1      | 0    | 3       | 3       | 0     | 0       | 0       | 0     | 2        | 2        | 8199.1578  | 0.0042     |
| 1    | 0      | 1      | 0    | 1       | 1       | 0     | 0       | 0       | 0     | 2        | 2        | 8210.6944  | -0.0022    |
| 2    | 1      | 1      | 0    | 2       | 2       | 2     | 0       | 2       | 0     | 1        | 1        | 8889.2340  | 0.0011     |
| 2    | 1      | 1      | 0    | 3       | 2       | 2     | 0       | 2       | 0     | 4        | 3        | 8893.7401  | -0.0024    |
| 2    | 1      | 1      | 0    | 3       | 3       | 2     | 0       | 2       | 0     | 4        | 4        | 8893.7401  | -0.0053    |
| 2    | 1      | 1      | 0    | 1       | 0       | 2     | 0       | 2       | 0     | 1        | 1        | 8896.8923  | -0.0001    |
| 2    | 1      | 1      | 0    | 1       | 1       | 2     | 0       | 2       | 0     | 1        | 1        | 8896.9096  | -0.0006    |
| 2    | 1      | 1      | 0    | 1       | 1       | 2     | 0       | 2       | 0     | 1        | 0        | 8896.9215  | -0.0008    |
| 2    | 1      | 1      | 0    | 3       | 2       | 2     | 0       | 2       | 0     | 2        | 1        | 8897.7289  | 0.0038     |
| 2    | 1      | 1      | 0    | 3       | 3       | 2     | 0       | 2       | 0     | 2        | 2        | 8897.7360  | 0.0039     |
| 2    | 1      | 1      | 0    | 4       | 3       | 2     | 0       | 2       | 0     | 4        | 3        | 8901.4058  | -0.0006    |
| 2    | 1      | 1      | 0    | 4       | 4       | 2     | 0       | 2       | 0     | 4        | 4        | 8901.4135  | 0.0006     |
| 2    | 1      | 1      | 0    | 2       | 1       | 2     | 0       | 2       | 0     | 2        | 1        | 8903.2101  | 0.0042     |
| 2    | 1      | 1      | 0    | 2       | 2       | 2     | 0       | 2       | 0     | 2        | 2        | 8903.2101  | -0.0004    |
| 2    | 1      | 1      | 0    | 3       | 2       | 2     | 0       | 2       | 0     | 3        | 2        | 8907.7313  | 0.0041     |
| 2    | 1      | 1      | 0    | 3       | 3       | 2     | 0       | 2       | 0     | 3        | 3        | 8907.7313  | -0.0012    |
| 2    | 1      | 1      | 0    | 1       | 0       | 2     | 0       | 2       | 0     | 2        | 1        | 8910.8781  | -0.0016    |
| 2    | 1      | 1      | 0    | 1       | 1       | 2     | 0       | 2       | 0     | 2        | 2        | 8910.8862  | -0.0016    |
| 2    | 1      | 1      | 0    | 2       | 1       | 2     | 0       | 2       | 0     | 3        | 2        | 8913.2074  | -0.0007    |
| 2    | 1      | 1      | 0    | 2       | 2       | 2     | 0       | 2       | 0     | 3        | 3        | 8913.2074  | -0.0035    |
| 2    | 1      | 1      | 0    | 4       | 4       | 2     | 0       | 2       | 0     | 3        | 3        | 8915.3970  | -0.0030    |
| 3    | 1      | 2      | 0    | 4       | 4       | 2     | 2       | 1       | 0     | 3        | 3        | 10296.2390 | 0.0021     |
| 3    | 1      | 2      | 0    | 4       | 3       | 2     | 2       | 1       | 0     | 3        | 2        | 10296.2390 | -0.0040    |
| 3    | 1      | 2      | 0    | 3       | 3       | 2     | 2       | 1       | 0     | 2        | 2        | 10311.7297 | -0.0005    |
| 3    | 1      | 2      | 0    | 3       | 2       | 2     | 2       | 1       | 0     | 2        | 1        | 10311.7297 | -0.0031    |
| 2    | 0      | 2      | 0    | 3       | 2       | 1     | 1       | 1       | 0     | 2        | 1        | 10610.0048 | 0.0041     |
| 2    | 0      | 2      | 0    | 3       | 3       | 1     | 1       | 1       | 0     | 2        | 2        | 10610.0048 | -0.0005    |
| 2    | 0      | 2      | 0    | 3       | 2       | 1     | 1       | 1       | 0     | 3        | 2        | 10617.6732 | -0.0036    |
| 2    | 0      | 2      | 0    | 3       | 3       | 1     | 1       | 1       | 0     | 3        | 3        | 10617.6732 | 0.0004     |
| 2    | 0      | 2      | 0    | 2       | 1       | 1     | 1       | 1       | 0     | 2        | 1        | 10620.0050 | 0.0022     |
| 2    | 0      | 2      | 0    | 2       | 2       | 1     | 1       | 1       | 0     | 2        | 2        | 10620.0050 | -0.0007    |
| 2    | 0      | 2      | 0    | 2       | 2       | 1     | 1       | 1       | 0     | 3        | 3        | 10627.6710 | -0.0022    |
| 2    | 0      | 2      | 0    | 4       | 3       | 1     | 1       | 1       | 0     | 3        | 2        | 10631.6635 | 0.0020     |
| 2    | 0      | 2      | 0    | 4       | 4       | 1     | 1       | 1       | 0     | 3        | 3        | 10631.6635 | 0.0035     |

Table S6: Observed Transition Frequencies (in MHz) for  $^{13}\text{CH}_2\text{C}^{37}\text{ClF}$ 

|   |   |   |   |   |   |   |   |   |   |   |   |            |         |
|---|---|---|---|---|---|---|---|---|---|---|---|------------|---------|
| 2 | 0 | 2 | 0 | 2 | 1 | 1 | 1 | 1 | 0 | 1 | 0 | 10633.8005 | -0.0007 |
| 2 | 0 | 2 | 0 | 2 | 2 | 1 | 1 | 1 | 0 | 1 | 1 | 10633.8183 | -0.0011 |
| 2 | 0 | 2 | 0 | 1 | 1 | 1 | 1 | 1 | 0 | 2 | 2 | 10633.9819 | -0.0014 |
| 2 | 0 | 2 | 0 | 1 | 0 | 1 | 1 | 1 | 0 | 1 | 1 | 10647.7837 | -0.0013 |
| 2 | 0 | 2 | 0 | 1 | 1 | 1 | 1 | 1 | 0 | 1 | 0 | 10647.7837 | -0.0048 |
| 2 | 0 | 2 | 0 | 1 | 1 | 1 | 1 | 1 | 0 | 1 | 1 | 10647.7945 | -0.0026 |
| 3 | 1 | 2 | 0 | 3 | 2 | 3 | 0 | 3 | 0 | 2 | 1 | 12145.0033 | 0.0062  |
| 3 | 1 | 2 | 0 | 3 | 3 | 3 | 0 | 3 | 0 | 2 | 2 | 12145.0033 | 0.0031  |
| 3 | 1 | 2 | 0 | 4 | 3 | 3 | 0 | 3 | 0 | 5 | 4 | 12146.0815 | -0.0009 |
| 3 | 1 | 2 | 0 | 4 | 4 | 3 | 0 | 3 | 0 | 5 | 5 | 12146.0815 | -0.0042 |
| 3 | 1 | 2 | 0 | 4 | 4 | 3 | 0 | 3 | 0 | 3 | 3 | 12153.2549 | 0.0021  |
| 3 | 1 | 2 | 0 | 2 | 1 | 3 | 0 | 3 | 0 | 2 | 1 | 12156.1110 | 0.0041  |
| 3 | 1 | 2 | 0 | 2 | 2 | 3 | 0 | 3 | 0 | 2 | 2 | 12156.1110 | -0.0011 |
| 3 | 1 | 2 | 0 | 5 | 4 | 3 | 0 | 3 | 0 | 5 | 4 | 12157.1856 | -0.0024 |
| 3 | 1 | 2 | 0 | 5 | 5 | 3 | 0 | 3 | 0 | 5 | 5 | 12157.1940 | 0.0006  |
| 3 | 1 | 2 | 0 | 3 | 2 | 3 | 0 | 3 | 0 | 3 | 2 | 12158.4365 | 0.0034  |
| 3 | 1 | 2 | 0 | 3 | 3 | 3 | 0 | 3 | 0 | 3 | 3 | 12158.4365 | -0.0014 |
| 3 | 1 | 2 | 0 | 4 | 3 | 3 | 0 | 3 | 0 | 4 | 3 | 12159.5337 | 0.0036  |
| 3 | 1 | 2 | 0 | 4 | 4 | 3 | 0 | 3 | 0 | 4 | 4 | 12159.5337 | -0.0014 |
| 3 | 1 | 2 | 0 | 3 | 2 | 3 | 0 | 3 | 0 | 4 | 3 | 12164.7151 | -0.0011 |
| 3 | 1 | 2 | 0 | 3 | 3 | 3 | 0 | 3 | 0 | 4 | 4 | 12164.7151 | -0.0050 |
| 3 | 1 | 2 | 0 | 2 | 1 | 3 | 0 | 3 | 0 | 3 | 2 | 12169.5429 | 0.0000  |
| 3 | 1 | 2 | 0 | 2 | 2 | 3 | 0 | 3 | 0 | 3 | 3 | 12169.5429 | -0.0069 |
| 3 | 1 | 2 | 0 | 5 | 5 | 3 | 0 | 3 | 0 | 4 | 4 | 12170.6448 | 0.0020  |
| 1 | 1 | 1 | 0 | 1 | 1 | 0 | 0 | 0 | 0 | 2 | 2 | 13663.5862 | -0.0022 |
| 1 | 1 | 1 | 0 | 1 | 0 | 0 | 0 | 0 | 0 | 2 | 1 | 13663.5912 | -0.0058 |
| 1 | 1 | 1 | 0 | 3 | 2 | 0 | 0 | 0 | 0 | 2 | 1 | 13669.7189 | -0.0004 |
| 1 | 1 | 1 | 0 | 3 | 3 | 0 | 0 | 0 | 0 | 2 | 2 | 13669.7356 | 0.0010  |
| 1 | 1 | 1 | 0 | 2 | 1 | 0 | 0 | 0 | 0 | 2 | 1 | 13677.3977 | 0.0024  |
| 1 | 1 | 1 | 0 | 2 | 2 | 0 | 0 | 0 | 0 | 2 | 2 | 13677.3977 | -0.0045 |
| 2 | 1 | 2 | 0 | 3 | 3 | 1 | 1 | 1 | 0 | 2 | 2 | 14813.0970 | 0.0025  |
| 2 | 1 | 2 | 0 | 2 | 1 | 1 | 1 | 1 | 0 | 2 | 1 | 14817.9162 | -0.0005 |
| 2 | 1 | 2 | 0 | 2 | 2 | 1 | 1 | 1 | 0 | 2 | 2 | 14817.9225 | -0.0003 |
| 2 | 1 | 2 | 0 | 3 | 2 | 1 | 1 | 1 | 0 | 3 | 2 | 14820.7615 | -0.0008 |
| 2 | 1 | 2 | 0 | 3 | 3 | 1 | 1 | 1 | 0 | 3 | 3 | 14820.7615 | -0.0005 |
| 2 | 1 | 2 | 0 | 4 | 3 | 1 | 1 | 1 | 0 | 3 | 2 | 14827.5140 | 0.0051  |
| 2 | 1 | 2 | 0 | 4 | 4 | 1 | 1 | 1 | 0 | 3 | 3 | 14827.5140 | 0.0021  |
| 2 | 1 | 2 | 0 | 2 | 1 | 1 | 1 | 1 | 0 | 1 | 0 | 14831.7172 | 0.0021  |
| 2 | 1 | 2 | 0 | 2 | 2 | 1 | 1 | 1 | 0 | 1 | 1 | 14831.7357 | -0.0008 |
| 2 | 1 | 2 | 0 | 1 | 0 | 1 | 1 | 1 | 0 | 1 | 1 | 14838.4808 | 0.0004  |
| 2 | 1 | 2 | 0 | 1 | 1 | 1 | 1 | 1 | 0 | 1 | 0 | 14838.4808 | -0.0071 |
| 2 | 1 | 2 | 0 | 1 | 1 | 1 | 1 | 1 | 0 | 1 | 1 | 14838.4945 | -0.0020 |
| 4 | 2 | 2 | 0 | 6 | 6 | 4 | 1 | 3 | 0 | 6 | 6 | 15453.3596 | -0.0002 |
| 4 | 2 | 2 | 0 | 5 | 4 | 4 | 1 | 3 | 0 | 5 | 4 | 15458.5244 | 0.0047  |

Table S6: Observed Transition Frequencies (in MHz) for  $^{13}\text{CH}_2\text{C}^{37}\text{ClF}$ 

|   |   |   |   |   |   |   |   |   |   |   |   |            |         |
|---|---|---|---|---|---|---|---|---|---|---|---|------------|---------|
| 4 | 2 | 2 | 0 | 5 | 5 | 4 | 1 | 3 | 0 | 5 | 5 | 15458.5244 | -0.0026 |
| 3 | 2 | 1 | 0 | 5 | 5 | 3 | 1 | 2 | 0 | 5 | 5 | 15667.1623 | -0.0038 |
| 3 | 2 | 1 | 0 | 3 | 3 | 3 | 1 | 2 | 0 | 3 | 3 | 15672.5653 | 0.0010  |
| 3 | 2 | 1 | 0 | 4 | 4 | 3 | 1 | 2 | 0 | 4 | 4 | 15677.2978 | 0.0007  |
| 2 | 0 | 2 | 0 | 2 | 2 | 1 | 0 | 1 | 0 | 1 | 1 | 16086.7123 | 0.0010  |
| 2 | 0 | 2 | 0 | 3 | 2 | 1 | 0 | 1 | 0 | 3 | 2 | 16088.2497 | 0.0000  |
| 2 | 0 | 2 | 0 | 3 | 3 | 1 | 0 | 1 | 0 | 3 | 3 | 16088.2497 | -0.0041 |
| 2 | 0 | 2 | 0 | 1 | 1 | 1 | 0 | 1 | 0 | 1 | 1 | 16100.6867 | -0.0022 |
| 2 | 0 | 2 | 0 | 4 | 3 | 1 | 0 | 1 | 0 | 3 | 2 | 16102.2376 | 0.0032  |
| 2 | 0 | 2 | 0 | 4 | 4 | 1 | 0 | 1 | 0 | 3 | 3 | 16102.2435 | 0.0025  |
| 2 | 0 | 2 | 0 | 3 | 3 | 1 | 0 | 1 | 0 | 2 | 2 | 16102.6840 | 0.0039  |
| 2 | 0 | 2 | 0 | 2 | 2 | 1 | 0 | 1 | 0 | 2 | 2 | 16112.6824 | 0.0020  |
| 2 | 2 | 0 | 0 | 1 | 1 | 2 | 1 | 1 | 0 | 1 | 1 | 16694.5916 | -0.0027 |
| 2 | 2 | 0 | 0 | 1 | 0 | 2 | 1 | 1 | 0 | 2 | 1 | 16702.2570 | 0.0025  |
| 2 | 2 | 0 | 0 | 1 | 1 | 2 | 1 | 1 | 0 | 2 | 2 | 16702.2716 | 0.0000  |
| 2 | 2 | 0 | 0 | 2 | 2 | 2 | 1 | 1 | 0 | 1 | 1 | 16708.5750 | 0.0010  |
| 2 | 2 | 0 | 0 | 4 | 3 | 2 | 1 | 1 | 0 | 4 | 3 | 16710.0555 | -0.0038 |
| 2 | 2 | 0 | 0 | 4 | 4 | 2 | 1 | 1 | 0 | 4 | 4 | 16710.0721 | -0.0026 |
| 2 | 2 | 0 | 0 | 2 | 2 | 2 | 1 | 1 | 0 | 2 | 2 | 16716.2523 | 0.0010  |
| 2 | 2 | 0 | 0 | 4 | 4 | 2 | 1 | 1 | 0 | 3 | 3 | 16717.7440 | 0.0018  |
| 2 | 2 | 0 | 0 | 2 | 1 | 2 | 1 | 1 | 0 | 3 | 2 | 16721.7268 | 0.0053  |
| 2 | 2 | 0 | 0 | 2 | 2 | 2 | 1 | 1 | 0 | 3 | 3 | 16721.7268 | -0.0029 |
| 2 | 2 | 0 | 0 | 3 | 2 | 2 | 1 | 1 | 0 | 4 | 3 | 16724.0494 | -0.0030 |
| 2 | 2 | 0 | 0 | 3 | 2 | 2 | 1 | 1 | 0 | 3 | 2 | 16731.7178 | 0.0014  |
| 2 | 2 | 0 | 0 | 3 | 3 | 2 | 1 | 1 | 0 | 3 | 3 | 16731.7309 | 0.0018  |
| 2 | 1 | 1 | 0 | 3 | 3 | 1 | 1 | 0 | 0 | 2 | 2 | 17950.0306 | -0.0032 |
| 2 | 1 | 1 | 0 | 2 | 2 | 1 | 1 | 0 | 0 | 2 | 2 | 17955.5094 | -0.0027 |
| 2 | 1 | 1 | 0 | 3 | 2 | 1 | 1 | 0 | 0 | 3 | 2 | 17956.7842 | 0.0012  |
| 2 | 1 | 1 | 0 | 3 | 3 | 1 | 1 | 0 | 0 | 3 | 3 | 17956.7842 | 0.0009  |
| 2 | 1 | 1 | 0 | 4 | 3 | 1 | 1 | 0 | 0 | 3 | 2 | 17964.4572 | 0.0103  |
| 2 | 1 | 1 | 0 | 4 | 4 | 1 | 1 | 0 | 0 | 3 | 3 | 17964.4572 | 0.0064  |
| 2 | 1 | 1 | 0 | 2 | 2 | 1 | 1 | 0 | 0 | 1 | 1 | 17967.6790 | -0.0001 |
| 2 | 1 | 1 | 0 | 1 | 1 | 1 | 1 | 0 | 0 | 1 | 1 | 17975.3548 | -0.0016 |
| 3 | 0 | 3 | 0 | 4 | 3 | 2 | 1 | 2 | 0 | 4 | 3 | 19275.2700 | -0.0033 |
| 3 | 0 | 3 | 0 | 4 | 4 | 2 | 1 | 2 | 0 | 4 | 4 | 19275.2700 | -0.0035 |
| 3 | 0 | 3 | 0 | 4 | 3 | 2 | 1 | 2 | 0 | 3 | 2 | 19282.0257 | 0.0058  |
| 3 | 0 | 3 | 0 | 4 | 4 | 2 | 1 | 2 | 0 | 3 | 3 | 19282.0257 | 0.0024  |
| 3 | 0 | 3 | 0 | 3 | 3 | 2 | 1 | 2 | 0 | 2 | 2 | 19283.4783 | 0.0010  |
| 3 | 0 | 3 | 0 | 3 | 2 | 2 | 1 | 2 | 0 | 3 | 2 | 19288.3021 | -0.0009 |
| 3 | 0 | 3 | 0 | 3 | 3 | 2 | 1 | 2 | 0 | 3 | 3 | 19288.3021 | -0.0034 |
| 3 | 0 | 3 | 0 | 5 | 4 | 2 | 1 | 2 | 0 | 4 | 3 | 19288.7258 | 0.0048  |
| 3 | 0 | 3 | 0 | 5 | 5 | 2 | 1 | 2 | 0 | 4 | 4 | 19288.7258 | 0.0030  |
| 3 | 0 | 3 | 0 | 2 | 2 | 2 | 1 | 2 | 0 | 1 | 1 | 19290.1528 | -0.0022 |
| 3 | 0 | 3 | 0 | 2 | 2 | 2 | 1 | 2 | 0 | 2 | 2 | 19296.9152 | 0.0002  |

Table S6: Observed Transition Frequencies (in MHz) for  $^{13}\text{CH}_2\text{C}^{37}\text{ClF}$

|   |   |   |   |   |   |   |   |   |   |   |   |            |         |
|---|---|---|---|---|---|---|---|---|---|---|---|------------|---------|
| 2 | 1 | 2 | 0 | 2 | 1 | 1 | 0 | 1 | 0 | 1 | 0 | 20284.6108 | -0.0006 |
| 2 | 1 | 2 | 0 | 2 | 2 | 1 | 0 | 1 | 0 | 1 | 1 | 20284.6280 | -0.0003 |
| 2 | 1 | 2 | 0 | 3 | 2 | 1 | 0 | 1 | 0 | 3 | 2 | 20291.3369 | 0.0017  |
| 2 | 1 | 2 | 0 | 3 | 3 | 1 | 0 | 1 | 0 | 3 | 3 | 20291.3369 | -0.0062 |
| 2 | 1 | 2 | 0 | 1 | 0 | 1 | 0 | 1 | 0 | 1 | 1 | 20291.3718 | -0.0005 |
| 2 | 1 | 2 | 0 | 1 | 1 | 1 | 0 | 1 | 0 | 1 | 1 | 20291.3873 | -0.0010 |
| 2 | 1 | 2 | 0 | 4 | 4 | 1 | 0 | 1 | 0 | 3 | 3 | 20298.0950 | 0.0021  |
| 2 | 1 | 2 | 0 | 3 | 2 | 1 | 0 | 1 | 0 | 2 | 1 | 20305.7586 | 0.0012  |
| 2 | 1 | 2 | 0 | 3 | 3 | 1 | 0 | 1 | 0 | 2 | 2 | 20305.7734 | 0.0041  |
| 2 | 1 | 2 | 0 | 2 | 1 | 1 | 0 | 1 | 0 | 2 | 1 | 20310.5862 | -0.0017 |
| 2 | 1 | 2 | 0 | 2 | 2 | 1 | 0 | 1 | 0 | 2 | 2 | 20310.5981 | 0.0006  |

Table S7: Observed Transition Frequencies (in MHz) for (*E*)-CHDC<sup>35</sup>ClF

| $J'$ | $K_a'$ | $K_c'$ | $s'$ | $m_1'$ | $m_2'$ | $J''$ | $K_a''$ | $K_c''$ | $s''$ | $m_1''$ | $m_2''$ | Observed  | Obs - Calc |
|------|--------|--------|------|--------|--------|-------|---------|---------|-------|---------|---------|-----------|------------|
| 1    | 1      | 0      | 1    | 16     | 0      | 1     | 0       | 1       | 1     | 11      | 1       | 7080.7277 | -0.0016    |
| 1    | 1      | 0      | 1    | 8      | 2      | 1     | 0       | 1       | 1     | 8       | 2       | 7080.7318 | -0.0008    |
| 1    | 1      | 0      | 1    | 8      | 2      | 1     | 0       | 1       | 1     | 13      | 1       | 7080.7318 | -0.0009    |
| 1    | 1      | 0      | 1    | 13     | 1      | 1     | 0       | 1       | 1     | 8       | 2       | 7080.7318 | -0.0008    |
| 1    | 1      | 0      | 1    | 11     | 1      | 1     | 0       | 1       | 1     | 11      | 1       | 7080.7401 | 0.0037     |
| 1    | 1      | 0      | 1    | 11     | 1      | 1     | 0       | 1       | 1     | 16      | 0       | 7080.7401 | 0.0002     |
| 1    | 1      | 0      | 1    | 5      | 2      | 1     | 0       | 1       | 1     | 11      | 1       | 7096.1600 | 0.0008     |
| 1    | 1      | 0      | 1    | 5      | 2      | 1     | 0       | 1       | 1     | 8       | 2       | 7096.1650 | 0.0024     |
| 1    | 1      | 0      | 1    | 3      | 3      | 1     | 0       | 1       | 1     | 8       | 2       | 7096.1712 | 0.0033     |
| 1    | 1      | 0      | 1    | 10     | 1      | 1     | 0       | 1       | 1     | 11      | 1       | 7096.1864 | 0.0056     |
| 1    | 1      | 0      | 1    | 10     | 1      | 1     | 0       | 1       | 1     | 16      | 0       | 7096.1864 | 0.0021     |
| 1    | 1      | 0      | 1    | 7      | 2      | 1     | 0       | 1       | 1     | 8       | 2       | 7096.1898 | 0.0015     |
| 1    | 1      | 0      | 1    | 7      | 2      | 1     | 0       | 1       | 1     | 13      | 1       | 7096.1898 | 0.0014     |
| 1    | 1      | 0      | 1    | 4      | 2      | 1     | 0       | 1       | 1     | 4       | 2       | 7102.2177 | 0.0002     |
| 1    | 1      | 0      | 1    | 2      | 3      | 1     | 0       | 1       | 1     | 2       | 3       | 7102.2226 | -0.0005    |
| 1    | 1      | 0      | 1    | 1      | 3      | 1     | 0       | 1       | 1     | 1       | 3       | 7102.2788 | -0.0011    |
| 1    | 1      | 0      | 1    | 0      | 4      | 1     | 0       | 1       | 1     | 0       | 4       | 7102.2844 | -0.0012    |
| 1    | 1      | 0      | 1    | 9      | 1      | 1     | 0       | 1       | 1     | 9       | 1       | 7102.3043 | -0.0009    |
| 1    | 1      | 0      | 1    | 6      | 2      | 1     | 0       | 1       | 1     | 6       | 2       | 7102.3100 | -0.0018    |
| 1    | 1      | 0      | 0    | 2      | 3      | 1     | 0       | 1       | 0     | 3       | 3       | 7110.8027 | -0.0015    |
| 1    | 1      | 0      | 0    | 2      | 2      | 1     | 0       | 1       | 0     | 3       | 3       | 7110.8222 | -0.0029    |
| 1    | 1      | 0      | 0    | 2      | 3      | 1     | 0       | 1       | 0     | 3       | 4       | 7110.8402 | -0.0036    |
| 1    | 1      | 0      | 0    | 2      | 2      | 1     | 0       | 1       | 0     | 3       | 2       | 7110.8789 | -0.0027    |
| 1    | 1      | 0      | 1    | 13     | 1      | 1     | 0       | 1       | 1     | 12      | 1       | 7113.6828 | -0.0017    |
| 1    | 1      | 0      | 1    | 13     | 1      | 1     | 0       | 1       | 1     | 15      | 0       | 7113.6884 | 0.0016     |
| 1    | 1      | 0      | 1    | 11     | 1      | 1     | 0       | 1       | 1     | 15      | 0       | 7113.6942 | 0.0002     |
| 1    | 1      | 0      | 1    | 8      | 2      | 1     | 0       | 1       | 1     | 3       | 3       | 7113.7135 | -0.0007    |
| 1    | 1      | 0      | 1    | 8      | 2      | 1     | 0       | 1       | 1     | 5       | 2       | 7113.7206 | 0.0040     |
| 1    | 1      | 0      | 1    | 11     | 1      | 1     | 0       | 1       | 1     | 5       | 2       | 7113.7249 | 0.0011     |
| 1    | 1      | 0      | 1    | 8      | 2      | 1     | 0       | 1       | 1     | 7       | 2       | 7113.7513 | -0.0010    |
| 1    | 1      | 0      | 1    | 13     | 1      | 1     | 0       | 1       | 1     | 7       | 2       | 7113.7513 | -0.0010    |
| 1    | 1      | 0      | 1    | 11     | 1      | 1     | 0       | 1       | 1     | 10      | 1       | 7113.7573 | -0.0042    |
| 1    | 1      | 0      | 1    | 9      | 1      | 1     | 0       | 1       | 1     | 15      | 0       | 7120.5602 | -0.0006    |
| 1    | 1      | 0      | 1    | 2      | 3      | 1     | 0       | 1       | 1     | 3       | 3       | 7120.5663 | -0.0022    |
| 1    | 1      | 0      | 1    | 6      | 2      | 1     | 0       | 1       | 1     | 12      | 1       | 7120.5734 | 0.0026     |
| 1    | 1      | 0      | 1    | 1      | 3      | 1     | 0       | 1       | 1     | 5       | 2       | 7120.5870 | 0.0044     |
| 1    | 1      | 0      | 1    | 0      | 4      | 1     | 0       | 1       | 1     | 3       | 3       | 7120.5941 | 0.0024     |
| 1    | 1      | 0      | 1    | 4      | 2      | 1     | 0       | 1       | 1     | 10      | 1       | 7120.6011 | 0.0035     |
| 1    | 1      | 0      | 1    | 2      | 3      | 1     | 0       | 1       | 1     | 7       | 2       | 7120.6093 | 0.0027     |
| 1    | 1      | 0      | 1    | 9      | 1      | 1     | 0       | 1       | 1     | 10      | 1       | 7120.6285 | 0.0002     |
| 1    | 1      | 0      | 1    | 6      | 2      | 1     | 0       | 1       | 1     | 7       | 2       | 7120.6419 | 0.0033     |
| 1    | 1      | 0      | 1    | 12     | 1      | 1     | 0       | 1       | 1     | 12      | 1       | 7129.1038 | 0.0018     |
| 1    | 1      | 0      | 1    | 7      | 2      | 1     | 0       | 1       | 1     | 12      | 1       | 7129.1367 | -0.0035    |

Table S7: Observed Transition Frequencies (in MHz) for (*E*)-CHDC<sup>35</sup>ClF

|   |   |   |   |    |   |   |   |   |   |    |   |           |         |
|---|---|---|---|----|---|---|---|---|---|----|---|-----------|---------|
| 1 | 1 | 0 | 1 | 5  | 2 | 1 | 0 | 1 | 1 | 5  | 2 | 7129.1475 | 0.0008  |
| 1 | 1 | 0 | 1 | 3  | 3 | 1 | 0 | 1 | 1 | 3  | 3 | 7129.1518 | 0.0023  |
| 1 | 1 | 0 | 1 | 7  | 2 | 1 | 0 | 1 | 1 | 7  | 2 | 7129.2084 | 0.0004  |
| 1 | 0 | 1 | 0 | 2  | 2 | 0 | 0 | 0 | 0 | 2  | 2 | 8131.7001 | -0.0011 |
| 1 | 0 | 1 | 0 | 2  | 3 | 0 | 0 | 0 | 0 | 2  | 3 | 8131.7381 | -0.0008 |
| 1 | 0 | 1 | 0 | 2  | 1 | 0 | 0 | 0 | 0 | 2  | 1 | 8131.7680 | -0.0010 |
| 1 | 0 | 1 | 0 | 2  | 1 | 0 | 0 | 0 | 0 | 2  | 2 | 8131.7680 | -0.0011 |
| 1 | 0 | 1 | 1 | 9  | 1 | 0 | 0 | 0 | 1 | 9  | 0 | 8150.0221 | -0.0008 |
| 1 | 0 | 1 | 1 | 6  | 2 | 0 | 0 | 0 | 1 | 6  | 1 | 8150.0303 | 0.0017  |
| 1 | 0 | 1 | 1 | 1  | 3 | 0 | 0 | 0 | 1 | 1  | 2 | 8150.0439 | 0.0037  |
| 1 | 0 | 1 | 1 | 0  | 4 | 0 | 0 | 0 | 1 | 0  | 3 | 8150.0486 | 0.0026  |
| 1 | 0 | 1 | 1 | 4  | 2 | 0 | 0 | 0 | 1 | 4  | 1 | 8150.0861 | 0.0061  |
| 1 | 0 | 1 | 1 | 2  | 3 | 0 | 0 | 0 | 1 | 2  | 2 | 8150.0895 | 0.0041  |
| 1 | 0 | 1 | 0 | 1  | 2 | 0 | 0 | 0 | 0 | 2  | 3 | 8164.7198 | -0.0026 |
| 2 | 1 | 1 | 1 | 16 | 1 | 2 | 0 | 2 | 1 | 21 | 0 | 8911.2566 | 0.0032  |
| 2 | 1 | 1 | 1 | 20 | 0 | 2 | 0 | 2 | 1 | 19 | 1 | 8911.2566 | 0.0032  |
| 2 | 1 | 1 | 1 | 11 | 2 | 2 | 0 | 2 | 1 | 17 | 1 | 8911.2665 | 0.0030  |
| 2 | 1 | 1 | 1 | 8  | 3 | 2 | 0 | 2 | 1 | 14 | 2 | 8911.2665 | 0.0011  |
| 2 | 1 | 1 | 0 | 3  | 4 | 2 | 0 | 2 | 0 | 4  | 4 | 8916.9685 | -0.0016 |
| 2 | 1 | 1 | 0 | 3  | 3 | 2 | 0 | 2 | 0 | 4  | 4 | 8916.9745 | -0.0046 |
| 2 | 1 | 1 | 0 | 3  | 4 | 2 | 0 | 2 | 0 | 4  | 5 | 8917.0155 | -0.0060 |
| 2 | 1 | 1 | 0 | 3  | 2 | 2 | 0 | 2 | 0 | 4  | 3 | 8917.0265 | -0.0061 |
| 2 | 1 | 1 | 1 | 17 | 1 | 2 | 0 | 2 | 1 | 21 | 0 | 8921.0148 | 0.0018  |
| 2 | 1 | 1 | 1 | 14 | 2 | 2 | 0 | 2 | 1 | 19 | 1 | 8921.0272 | -0.0006 |
| 2 | 1 | 1 | 1 | 14 | 2 | 2 | 0 | 2 | 1 | 14 | 2 | 8921.0272 | -0.0007 |
| 2 | 1 | 1 | 1 | 19 | 1 | 2 | 0 | 2 | 1 | 14 | 2 | 8921.0272 | -0.0007 |
| 2 | 1 | 1 | 1 | 21 | 0 | 2 | 0 | 2 | 1 | 17 | 1 | 8921.0371 | -0.0008 |
| 2 | 1 | 1 | 1 | 12 | 2 | 2 | 0 | 2 | 1 | 18 | 1 | 8922.0667 | -0.0003 |
| 2 | 1 | 1 | 1 | 5  | 3 | 2 | 0 | 2 | 1 | 11 | 2 | 8922.0718 | 0.0027  |
| 2 | 1 | 1 | 1 | 3  | 4 | 2 | 0 | 2 | 1 | 8  | 3 | 8922.0780 | 0.0032  |
| 2 | 1 | 1 | 1 | 10 | 2 | 2 | 0 | 2 | 1 | 16 | 1 | 8922.0879 | 0.0060  |
| 2 | 1 | 1 | 1 | 7  | 3 | 2 | 0 | 2 | 1 | 13 | 2 | 8922.0879 | 0.0044  |
| 2 | 1 | 1 | 1 | 4  | 3 | 2 | 0 | 2 | 1 | 4  | 3 | 8926.7300 | 0.0001  |
| 2 | 1 | 1 | 1 | 2  | 4 | 2 | 0 | 2 | 1 | 2  | 4 | 8926.7355 | 0.0009  |
| 2 | 1 | 1 | 1 | 1  | 4 | 2 | 0 | 2 | 1 | 1  | 4 | 8926.7573 | 0.0000  |
| 2 | 1 | 1 | 1 | 0  | 5 | 2 | 0 | 2 | 1 | 0  | 5 | 8926.7622 | -0.0006 |
| 2 | 1 | 1 | 1 | 6  | 3 | 2 | 0 | 2 | 1 | 6  | 3 | 8926.7698 | -0.0005 |
| 2 | 1 | 1 | 1 | 11 | 2 | 2 | 0 | 2 | 1 | 8  | 3 | 8929.0295 | -0.0008 |
| 2 | 1 | 1 | 1 | 20 | 0 | 2 | 0 | 2 | 1 | 18 | 1 | 8929.0295 | -0.0010 |
| 2 | 1 | 1 | 1 | 11 | 2 | 2 | 0 | 2 | 1 | 11 | 2 | 8929.0379 | -0.0005 |
| 2 | 1 | 1 | 1 | 8  | 3 | 2 | 0 | 2 | 1 | 8  | 3 | 8929.0423 | 0.0001  |
| 2 | 1 | 1 | 1 | 8  | 3 | 2 | 0 | 2 | 1 | 11 | 2 | 8929.0507 | 0.0004  |
| 2 | 1 | 1 | 1 | 18 | 1 | 2 | 0 | 2 | 1 | 20 | 0 | 8929.0507 | 0.0003  |
| 2 | 1 | 1 | 1 | 3  | 4 | 2 | 0 | 2 | 1 | 7  | 3 | 8934.7829 | -0.0019 |

Table S7: Observed Transition Frequencies (in MHz) for (*E*)-CHDC<sup>35</sup>CIF

|   |   |   |   |    |   |   |   |   |   |    |   |           |         |
|---|---|---|---|----|---|---|---|---|---|----|---|-----------|---------|
| 2 | 1 | 1 | 1 | 10 | 2 | 2 | 0 | 2 | 1 | 10 | 2 | 8934.7916 | -0.0005 |
| 2 | 1 | 1 | 1 | 7  | 3 | 2 | 0 | 2 | 1 | 7  | 3 | 8934.7916 | -0.0020 |
| 2 | 1 | 1 | 1 | 5  | 3 | 2 | 0 | 2 | 1 | 5  | 3 | 8934.7999 | 0.0001  |
| 2 | 1 | 1 | 1 | 3  | 4 | 2 | 0 | 2 | 1 | 3  | 4 | 8934.8046 | 0.0003  |
| 2 | 1 | 1 | 1 | 7  | 3 | 2 | 0 | 2 | 1 | 3  | 4 | 8934.8162 | 0.0030  |
| 2 | 1 | 1 | 1 | 17 | 1 | 2 | 0 | 2 | 1 | 11 | 2 | 8938.7957 | -0.0022 |
| 2 | 1 | 1 | 1 | 14 | 2 | 2 | 0 | 2 | 1 | 8  | 3 | 8938.8028 | -0.0019 |
| 2 | 1 | 1 | 1 | 21 | 0 | 2 | 0 | 2 | 1 | 16 | 1 | 8938.8086 | -0.0041 |
| 2 | 1 | 1 | 1 | 19 | 1 | 2 | 0 | 2 | 1 | 20 | 0 | 8938.8086 | -0.0043 |
| 2 | 1 | 1 | 1 | 16 | 1 | 2 | 0 | 2 | 1 | 10 | 2 | 8941.7450 | -0.0035 |
| 2 | 1 | 1 | 1 | 13 | 2 | 2 | 0 | 2 | 1 | 7  | 3 | 8941.7496 | -0.0026 |
| 2 | 1 | 1 | 1 | 11 | 2 | 2 | 0 | 2 | 1 | 5  | 3 | 8941.7657 | -0.0033 |
| 2 | 1 | 1 | 1 | 8  | 3 | 2 | 0 | 2 | 1 | 3  | 4 | 8941.7684 | -0.0033 |
| 2 | 1 | 1 | 1 | 18 | 1 | 2 | 0 | 2 | 1 | 12 | 2 | 8941.7782 | -0.0031 |
| 2 | 1 | 1 | 1 | 1  | 4 | 2 | 0 | 2 | 1 | 5  | 3 | 8944.5430 | 0.0056  |
| 2 | 1 | 1 | 1 | 0  | 5 | 2 | 0 | 2 | 1 | 3  | 4 | 8944.5504 | 0.0055  |
| 2 | 1 | 1 | 1 | 2  | 4 | 2 | 0 | 2 | 1 | 7  | 3 | 8944.5551 | 0.0069  |
| 3 | 1 | 2 | 0 | 4  | 4 | 3 | 1 | 3 | 0 | 5  | 5 | 9210.6640 | -0.0048 |
| 3 | 1 | 2 | 0 | 4  | 5 | 3 | 1 | 3 | 0 | 5  | 6 | 9210.6794 | -0.0074 |
| 3 | 1 | 2 | 0 | 4  | 3 | 3 | 1 | 3 | 0 | 5  | 4 | 9210.6794 | -0.0095 |
| 3 | 1 | 2 | 1 | 16 | 2 | 3 | 1 | 3 | 1 | 21 | 1 | 9211.1813 | -0.0006 |
| 3 | 1 | 2 | 1 | 13 | 3 | 3 | 1 | 3 | 1 | 19 | 2 | 9211.1872 | 0.0014  |
| 3 | 1 | 2 | 1 | 8  | 4 | 3 | 1 | 3 | 1 | 14 | 3 | 9211.1955 | 0.0019  |
| 3 | 1 | 2 | 1 | 5  | 4 | 3 | 1 | 3 | 1 | 11 | 3 | 9217.6092 | 0.0045  |
| 3 | 1 | 2 | 1 | 10 | 3 | 3 | 1 | 3 | 1 | 16 | 2 | 9217.6132 | 0.0054  |
| 3 | 1 | 2 | 1 | 3  | 5 | 3 | 1 | 3 | 1 | 8  | 4 | 9217.6132 | 0.0037  |
| 3 | 1 | 2 | 1 | 12 | 3 | 3 | 1 | 3 | 1 | 18 | 2 | 9217.6183 | 0.0062  |
| 3 | 1 | 2 | 1 | 7  | 4 | 3 | 1 | 3 | 1 | 13 | 3 | 9217.6183 | 0.0056  |
| 3 | 1 | 2 | 1 | 5  | 4 | 3 | 1 | 3 | 1 | 5  | 4 | 9223.6847 | 0.0003  |
| 3 | 1 | 2 | 1 | 7  | 4 | 3 | 1 | 3 | 1 | 7  | 4 | 9223.6847 | 0.0007  |
| 3 | 1 | 2 | 1 | 12 | 3 | 3 | 1 | 3 | 1 | 12 | 3 | 9223.6882 | -0.0008 |
| 3 | 1 | 2 | 1 | 3  | 5 | 3 | 1 | 3 | 1 | 3  | 5 | 9223.6882 | -0.0001 |
| 3 | 1 | 2 | 0 | 3  | 3 | 3 | 1 | 3 | 0 | 3  | 3 | 9224.2044 | 0.0016  |
| 3 | 1 | 2 | 0 | 3  | 4 | 3 | 1 | 3 | 0 | 3  | 4 | 9224.2065 | 0.0005  |
| 3 | 1 | 2 | 0 | 5  | 5 | 3 | 1 | 3 | 0 | 5  | 5 | 9224.8059 | 0.0034  |
| 3 | 1 | 2 | 0 | 5  | 6 | 3 | 1 | 3 | 0 | 5  | 6 | 9224.8108 | 0.0023  |
| 3 | 1 | 2 | 0 | 2  | 3 | 3 | 1 | 3 | 0 | 2  | 3 | 9225.3260 | -0.0004 |
| 3 | 1 | 2 | 0 | 2  | 2 | 3 | 1 | 3 | 0 | 2  | 3 | 9225.3514 | -0.0011 |
| 3 | 1 | 2 | 0 | 3  | 3 | 3 | 1 | 3 | 0 | 4  | 4 | 9230.2693 | -0.0055 |
| 3 | 1 | 2 | 0 | 3  | 4 | 3 | 1 | 3 | 0 | 4  | 5 | 9230.2807 | -0.0047 |
| 3 | 1 | 2 | 0 | 5  | 6 | 3 | 1 | 3 | 0 | 4  | 5 | 9237.8118 | 0.0035  |
| 3 | 1 | 2 | 0 | 5  | 4 | 3 | 1 | 3 | 0 | 4  | 3 | 9237.8118 | 0.0029  |
| 3 | 1 | 2 | 0 | 5  | 5 | 3 | 1 | 3 | 0 | 4  | 4 | 9237.8183 | 0.0023  |
| 3 | 1 | 2 | 0 | 2  | 1 | 3 | 1 | 3 | 0 | 3  | 2 | 9238.3332 | 0.0030  |

Table S7: Observed Transition Frequencies (in MHz) for (*E*)-CHDC<sup>35</sup>ClF

|   |   |   |   |    |   |   |   |   |   |    |   |            |         |
|---|---|---|---|----|---|---|---|---|---|----|---|------------|---------|
| 3 | 1 | 2 | 0 | 2  | 3 | 3 | 1 | 3 | 0 | 3  | 4 | 9238.3378  | -0.0026 |
| 3 | 1 | 2 | 0 | 4  | 3 | 2 | 2 | 1 | 0 | 3  | 2 | 9843.1116  | 0.0031  |
| 3 | 1 | 2 | 0 | 4  | 5 | 2 | 2 | 1 | 0 | 3  | 4 | 9843.1264  | 0.0008  |
| 3 | 1 | 2 | 0 | 4  | 3 | 2 | 2 | 1 | 0 | 3  | 3 | 9843.1344  | -0.0029 |
| 3 | 1 | 2 | 1 | 10 | 3 | 2 | 2 | 1 | 1 | 10 | 2 | 9843.1704  | -0.0056 |
| 3 | 1 | 2 | 1 | 7  | 4 | 2 | 2 | 1 | 1 | 7  | 3 | 9843.1787  | 0.0001  |
| 3 | 1 | 2 | 1 | 11 | 3 | 2 | 2 | 1 | 1 | 5  | 3 | 9849.7193  | -0.0017 |
| 3 | 1 | 2 | 1 | 8  | 4 | 2 | 2 | 1 | 1 | 3  | 4 | 9849.7193  | -0.0039 |
| 3 | 1 | 2 | 1 | 16 | 2 | 2 | 2 | 1 | 1 | 10 | 2 | 9849.7665  | -0.0033 |
| 3 | 1 | 2 | 1 | 13 | 3 | 2 | 2 | 1 | 1 | 7  | 3 | 9849.7665  | -0.0037 |
| 3 | 1 | 2 | 1 | 12 | 3 | 2 | 2 | 1 | 1 | 6  | 3 | 9861.4188  | 0.0006  |
| 3 | 1 | 2 | 1 | 15 | 2 | 2 | 2 | 1 | 1 | 9  | 2 | 9861.4252  | -0.0007 |
| 3 | 1 | 2 | 1 | 3  | 5 | 2 | 2 | 1 | 1 | 0  | 5 | 9861.4413  | -0.0013 |
| 3 | 1 | 2 | 1 | 5  | 4 | 2 | 2 | 1 | 1 | 1  | 4 | 9861.4485  | 0.0002  |
| 3 | 1 | 2 | 1 | 7  | 4 | 2 | 2 | 1 | 1 | 2  | 4 | 9861.5232  | -0.0004 |
| 3 | 1 | 2 | 1 | 10 | 3 | 2 | 2 | 1 | 1 | 4  | 3 | 9861.5288  | -0.0013 |
| 3 | 1 | 2 | 0 | 3  | 4 | 2 | 2 | 1 | 0 | 2  | 3 | 9862.8217  | 0.0004  |
| 3 | 1 | 2 | 0 | 3  | 3 | 2 | 2 | 1 | 0 | 2  | 2 | 9862.8428  | -0.0002 |
| 3 | 1 | 2 | 0 | 5  | 4 | 2 | 2 | 1 | 0 | 4  | 3 | 9875.5507  | 0.0077  |
| 3 | 1 | 2 | 0 | 5  | 6 | 2 | 2 | 1 | 0 | 4  | 5 | 9875.5716  | 0.0043  |
| 3 | 1 | 2 | 0 | 5  | 5 | 2 | 2 | 1 | 0 | 4  | 4 | 9875.6659  | 0.0067  |
| 3 | 1 | 2 | 1 | 17 | 2 | 2 | 2 | 1 | 1 | 11 | 2 | 9876.9525  | -0.0029 |
| 3 | 1 | 2 | 1 | 14 | 3 | 2 | 2 | 1 | 1 | 8  | 3 | 9876.9525  | -0.0040 |
| 3 | 1 | 2 | 1 | 19 | 2 | 2 | 2 | 1 | 1 | 13 | 2 | 9876.9776  | -0.0039 |
| 3 | 1 | 2 | 1 | 22 | 1 | 2 | 2 | 1 | 1 | 19 | 1 | 9895.2538  | -0.0003 |
| 3 | 1 | 2 | 1 | 14 | 3 | 2 | 2 | 1 | 1 | 14 | 2 | 9895.2776  | -0.0026 |
| 3 | 1 | 2 | 1 | 17 | 2 | 2 | 2 | 1 | 1 | 17 | 1 | 9895.2832  | -0.0008 |
| 3 | 1 | 2 | 1 | 19 | 2 | 2 | 2 | 1 | 1 | 14 | 2 | 9895.3031  | -0.0021 |
| 3 | 1 | 2 | 1 | 19 | 2 | 2 | 2 | 1 | 1 | 19 | 1 | 9895.3031  | -0.0021 |
| 2 | 0 | 2 | 1 | 5  | 3 | 1 | 1 | 1 | 1 | 5  | 2 | 10428.6890 | 0.0015  |
| 2 | 0 | 2 | 1 | 3  | 4 | 1 | 1 | 1 | 1 | 3  | 3 | 10428.6932 | 0.0012  |
| 2 | 0 | 2 | 1 | 7  | 3 | 1 | 1 | 1 | 1 | 7  | 2 | 10428.6960 | 0.0009  |
| 2 | 0 | 2 | 1 | 12 | 2 | 1 | 1 | 1 | 1 | 12 | 1 | 10428.6960 | -0.0010 |
| 2 | 0 | 2 | 0 | 3  | 2 | 1 | 1 | 1 | 0 | 3  | 2 | 10438.4180 | -0.0002 |
| 2 | 0 | 2 | 0 | 3  | 4 | 1 | 1 | 1 | 0 | 3  | 4 | 10438.4332 | -0.0013 |
| 2 | 0 | 2 | 0 | 3  | 3 | 1 | 1 | 1 | 0 | 3  | 3 | 10438.4725 | 0.0003  |
| 2 | 0 | 2 | 0 | 2  | 2 | 1 | 1 | 1 | 0 | 2  | 2 | 10441.4035 | -0.0001 |
| 2 | 0 | 2 | 0 | 2  | 3 | 1 | 1 | 1 | 0 | 2  | 3 | 10441.4202 | -0.0002 |
| 2 | 0 | 2 | 0 | 2  | 1 | 1 | 1 | 1 | 0 | 2  | 1 | 10441.4348 | 0.0010  |
| 2 | 0 | 2 | 0 | 2  | 2 | 1 | 1 | 1 | 0 | 2  | 1 | 10441.4348 | 0.0007  |
| 2 | 0 | 2 | 1 | 18 | 1 | 1 | 1 | 1 | 1 | 6  | 2 | 10451.1519 | -0.0041 |
| 2 | 0 | 2 | 1 | 8  | 3 | 1 | 1 | 1 | 1 | 0  | 4 | 10451.1596 | -0.0036 |
| 2 | 0 | 2 | 1 | 11 | 2 | 1 | 1 | 1 | 1 | 1  | 3 | 10451.1622 | -0.0031 |
| 2 | 0 | 2 | 1 | 13 | 2 | 1 | 1 | 1 | 1 | 2  | 3 | 10451.1789 | -0.0036 |

Table S7: Observed Transition Frequencies (in MHz) for (*E*)-CHDC<sup>35</sup>CIF

|   |   |   |   |    |   |   |   |   |   |    |   |            |         |
|---|---|---|---|----|---|---|---|---|---|----|---|------------|---------|
| 2 | 0 | 2 | 1 | 16 | 1 | 1 | 1 | 1 | 1 | 4  | 2 | 10451.1789 | -0.0050 |
| 2 | 0 | 2 | 0 | 4  | 3 | 1 | 1 | 1 | 0 | 3  | 2 | 10456.1989 | 0.0061  |
| 2 | 0 | 2 | 0 | 4  | 5 | 1 | 1 | 1 | 0 | 3  | 4 | 10456.2210 | 0.0055  |
| 2 | 0 | 2 | 0 | 4  | 4 | 1 | 1 | 1 | 0 | 3  | 3 | 10456.2914 | 0.0067  |
| 2 | 0 | 2 | 1 | 11 | 2 | 1 | 1 | 1 | 1 | 11 | 1 | 10458.9625 | 0.0004  |
| 2 | 0 | 2 | 1 | 20 | 0 | 1 | 1 | 1 | 1 | 13 | 1 | 10458.9708 | 0.0025  |
| 2 | 0 | 2 | 1 | 16 | 1 | 1 | 1 | 1 | 1 | 16 | 0 | 10458.9708 | 0.0023  |
| 2 | 0 | 2 | 1 | 8  | 3 | 1 | 1 | 1 | 1 | 8  | 2 | 10458.9772 | 0.0007  |
| 2 | 0 | 2 | 1 | 17 | 1 | 1 | 1 | 1 | 1 | 10 | 1 | 10459.1713 | -0.0041 |
| 2 | 0 | 2 | 1 | 14 | 2 | 1 | 1 | 1 | 1 | 7  | 2 | 10459.1789 | -0.0029 |
| 2 | 0 | 2 | 1 | 19 | 1 | 1 | 1 | 1 | 1 | 7  | 2 | 10459.1789 | -0.0030 |
| 2 | 0 | 2 | 1 | 17 | 1 | 1 | 1 | 1 | 1 | 5  | 2 | 10459.1904 | -0.0026 |
| 2 | 0 | 2 | 1 | 14 | 2 | 1 | 1 | 1 | 1 | 3  | 3 | 10459.1956 | -0.0028 |
| 2 | 0 | 2 | 1 | 19 | 1 | 1 | 1 | 1 | 1 | 12 | 1 | 10459.2102 | -0.0028 |
| 2 | 0 | 2 | 1 | 17 | 1 | 1 | 1 | 1 | 1 | 11 | 1 | 10476.7427 | 0.0058  |
| 2 | 0 | 2 | 1 | 17 | 1 | 1 | 1 | 1 | 1 | 16 | 0 | 10476.7461 | 0.0029  |
| 2 | 0 | 2 | 1 | 21 | 0 | 1 | 1 | 1 | 1 | 11 | 1 | 10476.7461 | -0.0010 |
| 2 | 0 | 2 | 1 | 14 | 2 | 1 | 1 | 1 | 1 | 8  | 2 | 10476.7524 | -0.0009 |
| 2 | 0 | 2 | 1 | 14 | 2 | 1 | 1 | 1 | 1 | 13 | 1 | 10476.7524 | -0.0009 |
| 2 | 0 | 2 | 1 | 19 | 1 | 1 | 1 | 1 | 1 | 8  | 2 | 10476.7524 | -0.0010 |
| 3 | 1 | 2 | 1 | 18 | 2 | 3 | 0 | 3 | 1 | 19 | 2 | 12092.9386 | 0.0043  |
| 3 | 1 | 2 | 1 | 16 | 2 | 3 | 0 | 3 | 1 | 21 | 1 | 12092.9644 | 0.0015  |
| 3 | 1 | 2 | 1 | 13 | 3 | 3 | 0 | 3 | 1 | 19 | 2 | 12092.9705 | 0.0030  |
| 3 | 1 | 2 | 1 | 11 | 3 | 3 | 0 | 3 | 1 | 17 | 2 | 12092.9802 | 0.0020  |
| 3 | 1 | 2 | 1 | 8  | 4 | 3 | 0 | 3 | 1 | 14 | 3 | 12092.9846 | 0.0023  |
| 3 | 1 | 2 | 1 | 18 | 2 | 3 | 0 | 3 | 1 | 22 | 1 | 12093.0037 | 0.0007  |
| 3 | 1 | 2 | 0 | 4  | 4 | 3 | 0 | 3 | 0 | 5  | 5 | 12094.3469 | -0.0053 |
| 3 | 1 | 2 | 0 | 4  | 5 | 3 | 0 | 3 | 0 | 5  | 6 | 12094.3724 | -0.0082 |
| 3 | 1 | 2 | 0 | 4  | 3 | 3 | 0 | 3 | 0 | 5  | 4 | 12094.3779 | -0.0071 |
| 3 | 1 | 2 | 0 | 4  | 4 | 3 | 0 | 3 | 0 | 3  | 3 | 12103.4971 | 0.0026  |
| 3 | 1 | 2 | 0 | 4  | 5 | 3 | 0 | 3 | 0 | 3  | 4 | 12103.5036 | 0.0066  |
| 3 | 1 | 2 | 0 | 4  | 3 | 3 | 0 | 3 | 0 | 3  | 2 | 12103.5101 | 0.0083  |
| 3 | 1 | 2 | 1 | 22 | 1 | 3 | 0 | 3 | 1 | 19 | 2 | 12107.0529 | -0.0016 |
| 3 | 1 | 2 | 1 | 17 | 2 | 3 | 0 | 3 | 1 | 21 | 1 | 12107.0712 | -0.0010 |
| 3 | 1 | 2 | 1 | 19 | 2 | 3 | 0 | 3 | 1 | 19 | 2 | 12107.1046 | -0.0010 |
| 3 | 1 | 2 | 1 | 17 | 2 | 3 | 0 | 3 | 1 | 17 | 2 | 12107.1107 | -0.0006 |
| 3 | 1 | 2 | 1 | 14 | 3 | 3 | 0 | 3 | 1 | 14 | 3 | 12107.1156 | -0.0009 |
| 3 | 1 | 2 | 1 | 22 | 1 | 3 | 0 | 3 | 1 | 22 | 1 | 12107.1246 | 0.0014  |
| 3 | 1 | 2 | 1 | 21 | 1 | 3 | 0 | 3 | 1 | 17 | 2 | 12107.1398 | -0.0017 |
| 3 | 1 | 2 | 1 | 19 | 2 | 3 | 0 | 3 | 1 | 14 | 3 | 12107.1398 | -0.0017 |
| 3 | 1 | 2 | 1 | 19 | 2 | 3 | 0 | 3 | 1 | 22 | 1 | 12107.1750 | 0.0007  |
| 3 | 1 | 2 | 1 | 4  | 4 | 3 | 0 | 3 | 1 | 4  | 4 | 12108.4830 | -0.0002 |
| 3 | 1 | 2 | 1 | 2  | 5 | 3 | 0 | 3 | 1 | 2  | 5 | 12108.4895 | 0.0012  |
| 3 | 1 | 2 | 1 | 1  | 5 | 3 | 0 | 3 | 1 | 1  | 5 | 12108.4999 | 0.0006  |

Table S7: Observed Transition Frequencies (in MHz) for (*E*)-CHDC<sup>35</sup>ClF

|   |   |   |   |    |   |   |   |   |   |    |   |            |         |
|---|---|---|---|----|---|---|---|---|---|----|---|------------|---------|
| 3 | 1 | 2 | 1 | 0  | 6 | 3 | 0 | 3 | 1 | 0  | 6 | 12108.5039 | -0.0009 |
| 3 | 1 | 2 | 1 | 6  | 4 | 3 | 0 | 3 | 1 | 6  | 4 | 12108.5087 | 0.0005  |
| 3 | 1 | 2 | 1 | 16 | 2 | 3 | 0 | 3 | 1 | 16 | 2 | 12110.0841 | -0.0014 |
| 3 | 1 | 2 | 1 | 13 | 3 | 3 | 0 | 3 | 1 | 13 | 3 | 12110.0879 | -0.0010 |
| 3 | 1 | 2 | 1 | 11 | 3 | 3 | 0 | 3 | 1 | 11 | 3 | 12110.0933 | 0.0002  |
| 3 | 1 | 2 | 1 | 8  | 4 | 3 | 0 | 3 | 1 | 8  | 4 | 12110.0975 | -0.0004 |
| 3 | 1 | 2 | 1 | 10 | 3 | 3 | 0 | 3 | 1 | 10 | 3 | 12111.4911 | -0.0009 |
| 3 | 1 | 2 | 1 | 7  | 4 | 3 | 0 | 3 | 1 | 7  | 4 | 12111.4960 | -0.0002 |
| 3 | 1 | 2 | 1 | 5  | 4 | 3 | 0 | 3 | 1 | 5  | 4 | 12111.5033 | 0.0006  |
| 3 | 1 | 2 | 1 | 3  | 5 | 3 | 0 | 3 | 1 | 3  | 5 | 12111.5074 | -0.0003 |
| 3 | 1 | 2 | 1 | 12 | 3 | 3 | 0 | 3 | 1 | 12 | 3 | 12111.5109 | 0.0004  |
| 3 | 1 | 2 | 0 | 3  | 3 | 3 | 0 | 3 | 0 | 4  | 4 | 12118.0817 | -0.0049 |
| 3 | 1 | 2 | 0 | 3  | 4 | 3 | 0 | 3 | 0 | 4  | 5 | 12118.1006 | -0.0038 |
| 3 | 1 | 2 | 0 | 3  | 2 | 3 | 0 | 3 | 0 | 4  | 3 | 12118.1006 | -0.0063 |
| 3 | 1 | 2 | 1 | 22 | 1 | 3 | 0 | 3 | 1 | 18 | 2 | 12124.2161 | -0.0044 |
| 3 | 1 | 2 | 1 | 17 | 2 | 3 | 0 | 3 | 1 | 11 | 3 | 12124.2231 | -0.0031 |
| 3 | 1 | 2 | 1 | 19 | 2 | 3 | 0 | 3 | 1 | 13 | 3 | 12124.2231 | -0.0039 |
| 3 | 1 | 2 | 1 | 14 | 3 | 3 | 0 | 3 | 1 | 8  | 4 | 12124.2288 | -0.0033 |
| 3 | 1 | 2 | 1 | 1  | 5 | 3 | 0 | 3 | 1 | 5  | 4 | 12125.6312 | 0.0076  |
| 3 | 1 | 2 | 1 | 4  | 4 | 3 | 0 | 3 | 1 | 10 | 3 | 12125.6312 | 0.0070  |
| 3 | 1 | 2 | 1 | 0  | 6 | 3 | 0 | 3 | 1 | 3  | 5 | 12125.6399 | 0.0093  |
| 3 | 1 | 2 | 1 | 2  | 5 | 3 | 0 | 3 | 1 | 7  | 4 | 12125.6399 | 0.0088  |
| 1 | 1 | 1 | 1 | 8  | 2 | 0 | 0 | 0 | 1 | 0  | 3 | 13701.5128 | -0.0017 |
| 1 | 1 | 1 | 1 | 11 | 1 | 0 | 0 | 0 | 1 | 1  | 2 | 13701.5178 | -0.0031 |
| 1 | 1 | 1 | 1 | 4  | 2 | 0 | 0 | 0 | 1 | 4  | 1 | 13709.2986 | -0.0007 |
| 1 | 1 | 1 | 1 | 2  | 3 | 0 | 0 | 0 | 1 | 2  | 2 | 13709.3130 | 0.0042  |
| 1 | 1 | 1 | 1 | 1  | 3 | 0 | 0 | 0 | 1 | 1  | 2 | 13709.3174 | -0.0003 |
| 1 | 1 | 1 | 1 | 0  | 4 | 0 | 0 | 0 | 1 | 0  | 3 | 13709.3288 | 0.0010  |
| 1 | 1 | 1 | 1 | 6  | 2 | 0 | 0 | 0 | 1 | 6  | 1 | 13709.3391 | 0.0042  |
| 1 | 1 | 1 | 1 | 5  | 2 | 0 | 0 | 0 | 1 | 1  | 2 | 13719.0649 | 0.0000  |
| 1 | 1 | 1 | 1 | 3  | 3 | 0 | 0 | 0 | 1 | 0  | 3 | 13719.0693 | -0.0002 |
| 1 | 1 | 1 | 1 | 10 | 1 | 0 | 0 | 0 | 1 | 4  | 1 | 13719.0863 | 0.0038  |
| 1 | 1 | 1 | 1 | 7  | 2 | 0 | 0 | 0 | 1 | 2  | 2 | 13719.0863 | 0.0002  |
| 2 | 1 | 2 | 0 | 3  | 3 | 1 | 1 | 1 | 0 | 2  | 2 | 14736.0430 | -0.0023 |
| 2 | 1 | 2 | 0 | 3  | 4 | 1 | 1 | 1 | 0 | 2  | 3 | 14736.0488 | -0.0023 |
| 2 | 1 | 2 | 0 | 3  | 2 | 1 | 1 | 1 | 0 | 2  | 1 | 14736.0561 | -0.0036 |
| 2 | 1 | 2 | 0 | 3  | 3 | 1 | 1 | 1 | 0 | 2  | 3 | 14736.0676 | 0.0054  |
| 2 | 1 | 2 | 1 | 13 | 2 | 1 | 1 | 1 | 1 | 7  | 2 | 14742.1685 | -0.0013 |
| 2 | 1 | 2 | 1 | 11 | 2 | 1 | 1 | 1 | 1 | 5  | 2 | 14742.1796 | -0.0016 |
| 2 | 1 | 2 | 1 | 8  | 3 | 1 | 1 | 1 | 1 | 3  | 3 | 14742.1854 | -0.0009 |
| 2 | 1 | 2 | 1 | 5  | 3 | 1 | 1 | 1 | 1 | 1  | 3 | 14745.7945 | 0.0000  |
| 2 | 1 | 2 | 1 | 3  | 4 | 1 | 1 | 1 | 1 | 0  | 4 | 14745.7945 | -0.0012 |
| 2 | 1 | 2 | 1 | 7  | 3 | 1 | 1 | 1 | 1 | 0  | 4 | 14745.8107 | 0.0042  |
| 2 | 1 | 2 | 1 | 12 | 2 | 1 | 1 | 1 | 1 | 2  | 3 | 14745.8107 | 0.0028  |

Table S7: Observed Transition Frequencies (in MHz) for (*E*)-CHDC<sup>35</sup>CIF

|   |   |   |   |    |   |   |   |   |   |    |   |            |         |
|---|---|---|---|----|---|---|---|---|---|----|---|------------|---------|
| 2 | 1 | 2 | 1 | 7  | 3 | 1 | 1 | 1 | 1 | 2  | 3 | 14745.8247 | -0.0009 |
| 2 | 1 | 2 | 1 | 10 | 2 | 1 | 1 | 1 | 1 | 4  | 2 | 14745.8247 | -0.0011 |
| 2 | 1 | 2 | 1 | 17 | 1 | 1 | 1 | 1 | 1 | 10 | 1 | 14750.7395 | -0.0031 |
| 2 | 1 | 2 | 1 | 14 | 2 | 1 | 1 | 1 | 1 | 7  | 2 | 14750.7486 | -0.0026 |
| 2 | 1 | 2 | 1 | 19 | 1 | 1 | 1 | 1 | 1 | 7  | 2 | 14750.7486 | -0.0026 |
| 2 | 1 | 2 | 1 | 17 | 1 | 1 | 1 | 1 | 1 | 5  | 2 | 14750.7560 | -0.0041 |
| 2 | 1 | 2 | 1 | 14 | 2 | 1 | 1 | 1 | 1 | 3  | 3 | 14750.7652 | -0.0025 |
| 2 | 1 | 2 | 1 | 19 | 1 | 1 | 1 | 1 | 1 | 12 | 1 | 14750.7765 | -0.0058 |
| 2 | 1 | 2 | 0 | 2  | 1 | 1 | 1 | 1 | 0 | 3  | 2 | 14751.9167 | -0.0047 |
| 2 | 1 | 2 | 0 | 2  | 3 | 1 | 1 | 1 | 0 | 3  | 4 | 14751.9253 | -0.0038 |
| 2 | 1 | 2 | 0 | 2  | 2 | 1 | 1 | 1 | 0 | 3  | 3 | 14751.9439 | -0.0030 |
| 2 | 1 | 2 | 1 | 9  | 2 | 1 | 1 | 1 | 1 | 9  | 1 | 14754.3378 | 0.0029  |
| 2 | 1 | 2 | 1 | 6  | 3 | 1 | 1 | 1 | 1 | 6  | 2 | 14754.3400 | 0.0027  |
| 2 | 1 | 2 | 1 | 1  | 4 | 1 | 1 | 1 | 1 | 1  | 3 | 14754.3538 | 0.0039  |
| 2 | 1 | 2 | 1 | 0  | 5 | 1 | 1 | 1 | 1 | 0  | 4 | 14754.3587 | 0.0051  |
| 2 | 1 | 2 | 1 | 4  | 3 | 1 | 1 | 1 | 1 | 4  | 2 | 14754.4013 | 0.0037  |
| 2 | 1 | 2 | 1 | 2  | 4 | 1 | 1 | 1 | 1 | 2  | 3 | 14754.4055 | 0.0045  |
| 2 | 1 | 2 | 1 | 11 | 2 | 1 | 1 | 1 | 1 | 11 | 1 | 14759.7257 | 0.0006  |
| 2 | 1 | 2 | 1 | 16 | 1 | 1 | 1 | 1 | 1 | 16 | 0 | 14759.7341 | 0.0027  |
| 2 | 1 | 2 | 1 | 20 | 0 | 1 | 1 | 1 | 1 | 13 | 1 | 14759.7341 | 0.0026  |
| 2 | 1 | 2 | 1 | 8  | 3 | 1 | 1 | 1 | 1 | 8  | 2 | 14759.7421 | 0.0008  |
| 2 | 1 | 2 | 1 | 17 | 1 | 1 | 1 | 1 | 1 | 11 | 1 | 14768.3101 | 0.0060  |
| 2 | 1 | 2 | 1 | 17 | 1 | 1 | 1 | 1 | 1 | 16 | 0 | 14768.3101 | -0.0003 |
| 2 | 1 | 2 | 1 | 21 | 0 | 1 | 1 | 1 | 1 | 11 | 1 | 14768.3157 | -0.0007 |
| 2 | 1 | 2 | 1 | 14 | 2 | 1 | 1 | 1 | 1 | 8  | 2 | 14768.3223 | -0.0004 |
| 2 | 1 | 2 | 1 | 14 | 2 | 1 | 1 | 1 | 1 | 13 | 1 | 14768.3223 | -0.0004 |
| 2 | 1 | 2 | 1 | 19 | 1 | 1 | 1 | 1 | 1 | 8  | 2 | 14768.3223 | -0.0005 |
| 4 | 2 | 2 | 1 | 13 | 4 | 4 | 1 | 3 | 1 | 19 | 3 | 15621.5081 | 0.0049  |
| 4 | 2 | 2 | 1 | 11 | 4 | 4 | 1 | 3 | 1 | 17 | 3 | 15621.5236 | 0.0042  |
| 4 | 2 | 2 | 1 | 8  | 5 | 4 | 1 | 3 | 1 | 14 | 4 | 15621.5278 | 0.0043  |
| 4 | 2 | 2 | 1 | 18 | 3 | 4 | 1 | 3 | 1 | 22 | 2 | 15621.5377 | -0.0033 |
| 4 | 2 | 2 | 1 | 19 | 3 | 4 | 1 | 3 | 1 | 19 | 3 | 15630.4734 | -0.0002 |
| 4 | 2 | 2 | 1 | 21 | 2 | 4 | 1 | 3 | 1 | 21 | 2 | 15630.4734 | -0.0005 |
| 4 | 2 | 2 | 1 | 17 | 3 | 4 | 1 | 3 | 1 | 17 | 3 | 15630.4863 | -0.0002 |
| 4 | 2 | 2 | 1 | 14 | 4 | 4 | 1 | 3 | 1 | 14 | 4 | 15630.4923 | 0.0004  |
| 4 | 2 | 2 | 1 | 22 | 2 | 4 | 1 | 3 | 1 | 22 | 2 | 15630.4958 | 0.0017  |
| 4 | 2 | 2 | 1 | 23 | 1 | 4 | 1 | 3 | 1 | 23 | 1 | 15630.4958 | 0.0013  |
| 4 | 2 | 2 | 1 | 2  | 6 | 4 | 1 | 3 | 1 | 2  | 6 | 15632.7971 | -0.0008 |
| 4 | 2 | 2 | 1 | 1  | 6 | 4 | 1 | 3 | 1 | 1  | 6 | 15632.8136 | -0.0010 |
| 4 | 2 | 2 | 1 | 9  | 4 | 4 | 1 | 3 | 1 | 9  | 4 | 15632.8189 | 0.0002  |
| 4 | 2 | 2 | 1 | 0  | 7 | 4 | 1 | 3 | 1 | 0  | 7 | 15632.8189 | -0.0011 |
| 4 | 2 | 2 | 0 | 5  | 5 | 4 | 1 | 3 | 0 | 4  | 4 | 15633.9784 | 0.0038  |
| 4 | 2 | 2 | 0 | 5  | 6 | 4 | 1 | 3 | 0 | 4  | 5 | 15633.9936 | 0.0047  |
| 4 | 2 | 2 | 0 | 5  | 4 | 4 | 1 | 3 | 0 | 4  | 3 | 15633.9983 | 0.0036  |

Table S7: Observed Transition Frequencies (in MHz) for (*E*)-CHDC<sup>35</sup>ClF

|   |   |   |   |    |   |   |   |   |   |    |   |            |         |
|---|---|---|---|----|---|---|---|---|---|----|---|------------|---------|
| 4 | 2 | 2 | 1 | 13 | 4 | 4 | 1 | 3 | 1 | 13 | 4 | 15637.1143 | -0.0007 |
| 4 | 2 | 2 | 1 | 11 | 4 | 4 | 1 | 3 | 1 | 11 | 4 | 15637.1261 | -0.0002 |
| 4 | 2 | 2 | 1 | 8  | 5 | 4 | 1 | 3 | 1 | 8  | 5 | 15637.1315 | 0.0001  |
| 4 | 2 | 2 | 1 | 7  | 5 | 4 | 1 | 3 | 1 | 7  | 5 | 15639.4499 | -0.0004 |
| 4 | 2 | 2 | 1 | 5  | 5 | 4 | 1 | 3 | 1 | 5  | 5 | 15639.4625 | -0.0008 |
| 4 | 2 | 2 | 1 | 15 | 3 | 4 | 1 | 3 | 1 | 15 | 3 | 15639.4678 | 0.0003  |
| 4 | 2 | 2 | 1 | 3  | 6 | 4 | 1 | 3 | 1 | 3  | 6 | 15639.4678 | -0.0006 |
| 4 | 2 | 2 | 1 | 12 | 4 | 4 | 1 | 3 | 1 | 12 | 4 | 15639.4772 | 0.0010  |
| 4 | 2 | 2 | 1 | 11 | 4 | 4 | 1 | 3 | 1 | 5  | 5 | 15642.5975 | -0.0060 |
| 4 | 2 | 2 | 1 | 8  | 5 | 4 | 1 | 3 | 1 | 3  | 6 | 15642.6010 | -0.0070 |
| 4 | 2 | 2 | 1 | 19 | 3 | 4 | 1 | 3 | 1 | 13 | 4 | 15646.0795 | -0.0059 |
| 4 | 2 | 2 | 1 | 21 | 2 | 4 | 1 | 3 | 1 | 16 | 3 | 15646.0795 | -0.0064 |
| 4 | 2 | 2 | 1 | 17 | 3 | 4 | 1 | 3 | 1 | 11 | 4 | 15646.0903 | -0.0030 |
| 4 | 2 | 2 | 1 | 22 | 2 | 4 | 1 | 3 | 1 | 18 | 3 | 15646.0903 | -0.0040 |
| 4 | 2 | 2 | 1 | 14 | 4 | 4 | 1 | 3 | 1 | 8  | 5 | 15646.0963 | -0.0035 |
| 4 | 2 | 2 | 1 | 1  | 6 | 4 | 1 | 3 | 1 | 5  | 5 | 15648.4160 | 0.0012  |
| 4 | 2 | 2 | 1 | 0  | 7 | 4 | 1 | 3 | 1 | 3  | 6 | 15648.4225 | 0.0009  |
| 3 | 2 | 1 | 1 | 16 | 2 | 3 | 1 | 2 | 1 | 21 | 1 | 15899.6637 | 0.0040  |
| 3 | 2 | 1 | 1 | 13 | 3 | 3 | 1 | 2 | 1 | 19 | 2 | 15899.6748 | 0.0043  |
| 3 | 2 | 1 | 1 | 11 | 3 | 3 | 1 | 2 | 1 | 17 | 2 | 15899.6926 | 0.0032  |
| 3 | 2 | 1 | 1 | 8  | 4 | 3 | 1 | 2 | 1 | 14 | 3 | 15899.6992 | 0.0043  |
| 3 | 2 | 1 | 1 | 18 | 2 | 3 | 1 | 2 | 1 | 22 | 1 | 15899.7221 | 0.0012  |
| 3 | 2 | 1 | 1 | 19 | 2 | 3 | 1 | 2 | 1 | 19 | 2 | 15900.8877 | 0.0012  |
| 3 | 2 | 1 | 1 | 17 | 2 | 3 | 1 | 2 | 1 | 17 | 2 | 15900.9034 | 0.0004  |
| 3 | 2 | 1 | 1 | 14 | 3 | 3 | 1 | 2 | 1 | 14 | 3 | 15900.9124 | 0.0016  |
| 3 | 2 | 1 | 1 | 10 | 3 | 3 | 1 | 2 | 1 | 4  | 4 | 15905.7024 | -0.0065 |
| 3 | 2 | 1 | 1 | 7  | 4 | 3 | 1 | 2 | 1 | 2  | 5 | 15905.7070 | -0.0075 |
| 3 | 2 | 1 | 1 | 5  | 4 | 3 | 1 | 2 | 1 | 1  | 5 | 15905.7413 | -0.0073 |
| 3 | 2 | 1 | 1 | 3  | 5 | 3 | 1 | 2 | 1 | 0  | 6 | 15905.7460 | -0.0074 |
| 3 | 2 | 1 | 1 | 12 | 3 | 3 | 1 | 2 | 1 | 6  | 4 | 15905.7561 | -0.0070 |
| 3 | 2 | 1 | 1 | 4  | 4 | 3 | 1 | 2 | 1 | 4  | 4 | 15906.8960 | -0.0005 |
| 3 | 2 | 1 | 1 | 2  | 5 | 3 | 1 | 2 | 1 | 2  | 5 | 15906.9033 | -0.0012 |
| 3 | 2 | 1 | 1 | 1  | 5 | 3 | 1 | 2 | 1 | 1  | 5 | 15906.9342 | -0.0018 |
| 3 | 2 | 1 | 1 | 0  | 6 | 3 | 1 | 2 | 1 | 0  | 6 | 15906.9417 | -0.0014 |
| 3 | 2 | 1 | 1 | 6  | 4 | 3 | 1 | 2 | 1 | 6  | 4 | 15906.9518 | -0.0010 |
| 3 | 2 | 1 | 1 | 10 | 3 | 3 | 1 | 2 | 1 | 16 | 2 | 15913.2529 | 0.0056  |
| 3 | 2 | 1 | 1 | 7  | 4 | 3 | 1 | 2 | 1 | 13 | 3 | 15913.2641 | 0.0063  |
| 3 | 2 | 1 | 1 | 5  | 4 | 3 | 1 | 2 | 1 | 11 | 3 | 15913.2745 | 0.0041  |
| 3 | 2 | 1 | 1 | 3  | 5 | 3 | 1 | 2 | 1 | 8  | 4 | 15913.2835 | 0.0054  |
| 3 | 2 | 1 | 1 | 12 | 3 | 3 | 1 | 2 | 1 | 18 | 2 | 15913.2971 | 0.0072  |
| 3 | 2 | 1 | 1 | 16 | 2 | 3 | 1 | 2 | 1 | 16 | 2 | 15913.7995 | 0.0003  |
| 3 | 2 | 1 | 1 | 13 | 3 | 3 | 1 | 2 | 1 | 13 | 3 | 15913.8106 | 0.0020  |
| 3 | 2 | 1 | 1 | 11 | 3 | 3 | 1 | 2 | 1 | 11 | 3 | 15913.8223 | -0.0002 |
| 3 | 2 | 1 | 1 | 8  | 4 | 3 | 1 | 2 | 1 | 8  | 4 | 15913.8301 | 0.0009  |

Table S7: Observed Transition Frequencies (in MHz) for (*E*)-CHDC<sup>35</sup>CIF

|   |   |   |   |    |   |   |   |   |   |    |   |            |         |
|---|---|---|---|----|---|---|---|---|---|----|---|------------|---------|
| 3 | 2 | 1 | 1 | 18 | 2 | 3 | 1 | 2 | 1 | 18 | 2 | 15913.8436 | 0.0026  |
| 3 | 2 | 1 | 1 | 19 | 2 | 3 | 1 | 2 | 1 | 13 | 3 | 15915.0202 | -0.0044 |
| 3 | 2 | 1 | 1 | 17 | 2 | 3 | 1 | 2 | 1 | 11 | 3 | 15915.0335 | -0.0026 |
| 3 | 2 | 1 | 1 | 14 | 3 | 3 | 1 | 2 | 1 | 8  | 4 | 15915.0434 | -0.0017 |
| 3 | 2 | 1 | 1 | 22 | 1 | 3 | 1 | 2 | 1 | 18 | 2 | 15915.0581 | 0.0013  |
| 3 | 2 | 1 | 1 | 10 | 3 | 3 | 1 | 2 | 1 | 10 | 3 | 15919.8417 | 0.0006  |
| 3 | 2 | 1 | 1 | 7  | 4 | 3 | 1 | 2 | 1 | 7  | 4 | 15919.8500 | 0.0007  |
| 3 | 2 | 1 | 1 | 5  | 4 | 3 | 1 | 2 | 1 | 5  | 4 | 15919.8688 | -0.0007 |
| 3 | 2 | 1 | 1 | 3  | 5 | 3 | 1 | 2 | 1 | 3  | 5 | 15919.8762 | 0.0000  |
| 3 | 2 | 1 | 1 | 12 | 3 | 3 | 1 | 2 | 1 | 12 | 3 | 15919.8867 | 0.0009  |
| 3 | 2 | 1 | 1 | 16 | 2 | 3 | 1 | 2 | 1 | 10 | 3 | 15920.3889 | -0.0041 |
| 3 | 2 | 1 | 1 | 13 | 3 | 3 | 1 | 2 | 1 | 7  | 4 | 15920.3965 | -0.0037 |
| 3 | 2 | 1 | 1 | 11 | 3 | 3 | 1 | 2 | 1 | 5  | 4 | 15920.4167 | -0.0049 |
| 3 | 2 | 1 | 1 | 8  | 4 | 3 | 1 | 2 | 1 | 3  | 5 | 15920.4230 | -0.0043 |
| 3 | 2 | 1 | 1 | 18 | 2 | 3 | 1 | 2 | 1 | 12 | 3 | 15920.4335 | -0.0034 |
| 3 | 2 | 1 | 1 | 4  | 4 | 3 | 1 | 2 | 1 | 10 | 3 | 15921.0350 | 0.0062  |
| 3 | 2 | 1 | 1 | 2  | 5 | 3 | 1 | 2 | 1 | 7  | 4 | 15921.0458 | 0.0065  |
| 3 | 2 | 1 | 1 | 1  | 5 | 3 | 1 | 2 | 1 | 5  | 4 | 15921.0622 | 0.0054  |
| 3 | 2 | 1 | 1 | 0  | 6 | 3 | 1 | 2 | 1 | 3  | 5 | 15921.0719 | 0.0060  |
| 3 | 2 | 1 | 1 | 6  | 4 | 3 | 1 | 2 | 1 | 12 | 3 | 15921.0828 | 0.0073  |
| 2 | 0 | 2 | 1 | 11 | 2 | 1 | 0 | 1 | 1 | 11 | 1 | 15995.7577 | -0.0004 |
| 2 | 0 | 2 | 1 | 8  | 3 | 1 | 0 | 1 | 1 | 8  | 2 | 15995.7706 | 0.0011  |
| 2 | 0 | 2 | 0 | 3  | 3 | 1 | 0 | 1 | 0 | 3  | 3 | 15997.6938 | -0.0007 |
| 2 | 0 | 2 | 0 | 3  | 4 | 1 | 0 | 1 | 0 | 3  | 4 | 15997.7113 | -0.0028 |
| 2 | 0 | 2 | 0 | 3  | 2 | 1 | 0 | 1 | 0 | 3  | 2 | 15997.7226 | 0.0002  |
| 2 | 0 | 2 | 0 | 2  | 2 | 1 | 0 | 1 | 0 | 3  | 3 | 16010.4002 | -0.0050 |
| 2 | 0 | 2 | 0 | 2  | 3 | 1 | 0 | 1 | 0 | 3  | 4 | 16010.4396 | -0.0049 |
| 2 | 0 | 2 | 0 | 2  | 1 | 1 | 0 | 1 | 0 | 3  | 2 | 16010.4564 | -0.0049 |
| 2 | 0 | 2 | 1 | 17 | 1 | 1 | 0 | 1 | 1 | 11 | 1 | 16013.5353 | 0.0024  |
| 2 | 0 | 2 | 1 | 14 | 2 | 1 | 0 | 1 | 1 | 8  | 2 | 16013.5454 | -0.0009 |
| 2 | 0 | 2 | 1 | 14 | 2 | 1 | 0 | 1 | 1 | 13 | 1 | 16013.5454 | -0.0010 |
| 2 | 0 | 2 | 1 | 19 | 1 | 1 | 0 | 1 | 1 | 8  | 2 | 16013.5454 | -0.0010 |
| 2 | 0 | 2 | 1 | 1  | 4 | 1 | 0 | 1 | 1 | 1  | 3 | 16015.4955 | 0.0033  |
| 2 | 0 | 2 | 1 | 0  | 5 | 1 | 0 | 1 | 1 | 0  | 4 | 16015.5020 | 0.0044  |
| 2 | 0 | 2 | 1 | 6  | 3 | 1 | 0 | 1 | 1 | 6  | 2 | 16015.5020 | 0.0026  |
| 2 | 0 | 2 | 1 | 4  | 3 | 1 | 0 | 1 | 1 | 4  | 2 | 16015.5091 | 0.0050  |
| 2 | 0 | 2 | 1 | 2  | 4 | 1 | 0 | 1 | 1 | 2  | 3 | 16015.5151 | 0.0057  |
| 2 | 0 | 2 | 1 | 12 | 2 | 1 | 0 | 1 | 1 | 12 | 1 | 16015.9852 | 0.0029  |
| 2 | 0 | 2 | 1 | 5  | 3 | 1 | 0 | 1 | 1 | 5  | 2 | 16016.0164 | 0.0015  |
| 2 | 0 | 2 | 1 | 3  | 4 | 1 | 0 | 1 | 1 | 3  | 3 | 16016.0242 | 0.0026  |
| 2 | 0 | 2 | 1 | 10 | 2 | 1 | 0 | 1 | 1 | 10 | 1 | 16016.0759 | 0.0029  |
| 2 | 0 | 2 | 1 | 7  | 3 | 1 | 0 | 1 | 1 | 7  | 2 | 16016.0835 | 0.0042  |
| 2 | 0 | 2 | 1 | 18 | 1 | 1 | 0 | 1 | 1 | 12 | 1 | 16028.7210 | -0.0003 |
| 2 | 0 | 2 | 1 | 13 | 2 | 1 | 0 | 1 | 1 | 12 | 1 | 16028.7210 | -0.0006 |

Table S7: Observed Transition Frequencies (in MHz) for (*E*)-CHDC<sup>35</sup>CIF

|   |   |   |   |    |   |   |   |   |   |    |   |            |         |
|---|---|---|---|----|---|---|---|---|---|----|---|------------|---------|
| 2 | 0 | 2 | 1 | 11 | 2 | 1 | 0 | 1 | 1 | 5  | 2 | 16028.7440 | -0.0015 |
| 2 | 0 | 2 | 1 | 8  | 3 | 1 | 0 | 1 | 1 | 3  | 3 | 16028.7508 | -0.0003 |
| 2 | 0 | 2 | 1 | 11 | 2 | 1 | 0 | 1 | 1 | 10 | 1 | 16028.7809 | -0.0022 |
| 2 | 0 | 2 | 1 | 16 | 1 | 1 | 0 | 1 | 1 | 10 | 1 | 16028.7809 | -0.0023 |
| 2 | 0 | 2 | 1 | 13 | 2 | 1 | 0 | 1 | 1 | 7  | 2 | 16028.7894 | 0.0000  |
| 2 | 0 | 2 | 1 | 19 | 1 | 1 | 0 | 1 | 1 | 12 | 1 | 16046.4968 | -0.0015 |
| 2 | 0 | 2 | 1 | 17 | 1 | 1 | 0 | 1 | 1 | 5  | 2 | 16046.5183 | -0.0021 |
| 2 | 0 | 2 | 1 | 14 | 2 | 1 | 0 | 1 | 1 | 3  | 3 | 16046.5263 | -0.0017 |
| 2 | 0 | 2 | 1 | 17 | 1 | 1 | 0 | 1 | 1 | 10 | 1 | 16046.5563 | -0.0017 |
| 2 | 0 | 2 | 1 | 14 | 2 | 1 | 0 | 1 | 1 | 7  | 2 | 16046.5651 | -0.0009 |
| 2 | 0 | 2 | 1 | 19 | 1 | 1 | 0 | 1 | 1 | 7  | 2 | 16046.5651 | -0.0010 |
| 4 | 1 | 3 | 1 | 16 | 3 | 4 | 0 | 4 | 1 | 21 | 2 | 16885.1867 | 0.0009  |
| 4 | 1 | 3 | 1 | 13 | 4 | 4 | 0 | 4 | 1 | 19 | 3 | 16885.1942 | 0.0034  |
| 4 | 1 | 3 | 1 | 11 | 4 | 4 | 0 | 4 | 1 | 17 | 3 | 16885.2013 | 0.0019  |
| 4 | 1 | 3 | 1 | 8  | 5 | 4 | 0 | 4 | 1 | 14 | 4 | 16885.2062 | 0.0019  |
| 4 | 1 | 3 | 1 | 18 | 3 | 4 | 0 | 4 | 1 | 22 | 2 | 16885.2209 | 0.0061  |
| 4 | 1 | 3 | 0 | 5  | 5 | 4 | 0 | 4 | 0 | 6  | 6 | 16885.5275 | -0.0057 |
| 4 | 1 | 3 | 0 | 5  | 6 | 4 | 0 | 4 | 0 | 6  | 7 | 16885.5427 | -0.0104 |
| 4 | 1 | 3 | 0 | 5  | 4 | 4 | 0 | 4 | 0 | 6  | 5 | 16885.5427 | -0.0123 |
| 4 | 1 | 3 | 1 | 10 | 4 | 4 | 0 | 4 | 1 | 16 | 3 | 16896.2906 | 0.0049  |
| 4 | 1 | 3 | 1 | 5  | 5 | 4 | 0 | 4 | 1 | 11 | 4 | 16896.2967 | 0.0066  |
| 4 | 1 | 3 | 1 | 7  | 5 | 4 | 0 | 4 | 1 | 13 | 4 | 16896.2967 | 0.0049  |
| 4 | 1 | 3 | 1 | 3  | 6 | 4 | 0 | 4 | 1 | 8  | 5 | 16896.3006 | 0.0043  |
| 4 | 1 | 3 | 1 | 12 | 4 | 4 | 0 | 4 | 1 | 18 | 3 | 16896.3063 | 0.0060  |
| 4 | 1 | 3 | 1 | 21 | 2 | 4 | 0 | 4 | 1 | 21 | 2 | 16900.7945 | -0.0033 |
| 4 | 1 | 3 | 1 | 19 | 3 | 4 | 0 | 4 | 1 | 19 | 3 | 16900.8005 | -0.0021 |
| 4 | 1 | 3 | 1 | 17 | 3 | 4 | 0 | 4 | 1 | 17 | 3 | 16900.8005 | -0.0057 |
| 4 | 1 | 3 | 1 | 14 | 4 | 4 | 0 | 4 | 1 | 14 | 4 | 16900.8098 | -0.0023 |
| 4 | 1 | 3 | 1 | 4  | 5 | 4 | 0 | 4 | 1 | 4  | 5 | 16901.1383 | -0.0012 |
| 4 | 1 | 3 | 1 | 2  | 6 | 4 | 0 | 4 | 1 | 2  | 6 | 16901.1443 | -0.0009 |
| 4 | 1 | 3 | 1 | 1  | 6 | 4 | 0 | 4 | 1 | 1  | 6 | 16901.1511 | 0.0005  |
| 4 | 1 | 3 | 1 | 9  | 4 | 4 | 0 | 4 | 1 | 9  | 4 | 16901.1511 | -0.0016 |
| 4 | 1 | 3 | 1 | 0  | 7 | 4 | 0 | 4 | 1 | 0  | 7 | 16901.1577 | 0.0010  |
| 4 | 1 | 3 | 1 | 6  | 5 | 4 | 0 | 4 | 1 | 6  | 5 | 16901.1577 | -0.0008 |
| 4 | 1 | 3 | 1 | 16 | 3 | 4 | 0 | 4 | 1 | 16 | 3 | 16901.7576 | -0.0020 |
| 4 | 1 | 3 | 1 | 13 | 4 | 4 | 0 | 4 | 1 | 13 | 4 | 16901.7633 | -0.0012 |
| 4 | 1 | 3 | 1 | 11 | 4 | 4 | 0 | 4 | 1 | 11 | 4 | 16901.7633 | -0.0040 |
| 4 | 1 | 3 | 1 | 8  | 5 | 4 | 0 | 4 | 1 | 8  | 5 | 16901.7719 | -0.0011 |
| 4 | 1 | 3 | 1 | 18 | 3 | 4 | 0 | 4 | 1 | 18 | 3 | 16901.7719 | -0.0028 |
| 4 | 1 | 3 | 1 | 10 | 4 | 4 | 0 | 4 | 1 | 10 | 4 | 16902.0934 | -0.0021 |
| 4 | 1 | 3 | 1 | 7  | 5 | 4 | 0 | 4 | 1 | 7  | 5 | 16902.0997 | -0.0010 |
| 4 | 1 | 3 | 1 | 5  | 5 | 4 | 0 | 4 | 1 | 5  | 5 | 16902.1045 | 0.0001  |
| 4 | 1 | 3 | 1 | 15 | 3 | 4 | 0 | 4 | 1 | 15 | 3 | 16902.1045 | -0.0020 |
| 4 | 1 | 3 | 1 | 3  | 6 | 4 | 0 | 4 | 1 | 3  | 6 | 16902.1102 | 0.0001  |

Table S7: Observed Transition Frequencies (in MHz) for (*E*)-CHDC<sup>35</sup>CIF

|   |   |   |   |    |   |   |   |   |   |    |   |            |         |
|---|---|---|---|----|---|---|---|---|---|----|---|------------|---------|
| 4 | 1 | 3 | 1 | 12 | 4 | 4 | 0 | 4 | 1 | 12 | 4 | 16902.1102 | -0.0016 |
| 4 | 1 | 3 | 0 | 3  | 2 | 4 | 0 | 4 | 0 | 4  | 3 | 16917.3688 | -0.0056 |
| 4 | 1 | 3 | 0 | 3  | 3 | 4 | 0 | 4 | 0 | 4  | 4 | 16917.3688 | -0.0054 |
| 4 | 1 | 3 | 0 | 3  | 4 | 4 | 0 | 4 | 0 | 4  | 5 | 16917.3746 | -0.0037 |
| 4 | 1 | 3 | 1 | 1  | 6 | 4 | 0 | 4 | 1 | 5  | 5 | 16917.7123 | 0.0077  |
| 4 | 1 | 3 | 1 | 0  | 7 | 4 | 0 | 4 | 1 | 3  | 6 | 16917.7202 | 0.0084  |
| 2 | 2 | 0 | 1 | 14 | 2 | 2 | 1 | 1 | 1 | 19 | 1 | 16945.6315 | 0.0006  |
| 2 | 2 | 0 | 1 | 19 | 1 | 2 | 1 | 1 | 1 | 14 | 2 | 16945.6315 | 0.0005  |
| 2 | 2 | 0 | 1 | 14 | 2 | 2 | 1 | 1 | 1 | 14 | 2 | 16945.6315 | 0.0005  |
| 2 | 2 | 0 | 1 | 21 | 0 | 2 | 1 | 1 | 1 | 17 | 1 | 16945.6451 | -0.0006 |
| 2 | 2 | 0 | 1 | 17 | 1 | 2 | 1 | 1 | 1 | 11 | 2 | 16955.3799 | -0.0018 |
| 2 | 2 | 0 | 1 | 14 | 2 | 2 | 1 | 1 | 1 | 8  | 3 | 16955.3923 | -0.0012 |
| 2 | 2 | 0 | 1 | 21 | 0 | 2 | 1 | 1 | 1 | 16 | 1 | 16955.4028 | -0.0024 |
| 2 | 2 | 0 | 1 | 19 | 1 | 2 | 1 | 1 | 1 | 20 | 0 | 16955.4028 | -0.0025 |
| 2 | 2 | 0 | 1 | 11 | 2 | 2 | 1 | 1 | 1 | 17 | 1 | 16963.4075 | 0.0021  |
| 2 | 2 | 0 | 1 | 8  | 3 | 2 | 1 | 1 | 1 | 14 | 2 | 16963.4125 | 0.0030  |
| 2 | 2 | 0 | 1 | 4  | 3 | 2 | 1 | 1 | 1 | 4  | 3 | 16965.2527 | 0.0003  |
| 2 | 2 | 0 | 1 | 2  | 4 | 2 | 1 | 1 | 1 | 2  | 4 | 16965.2606 | -0.0012 |
| 2 | 2 | 0 | 1 | 1  | 4 | 2 | 1 | 1 | 1 | 1  | 4 | 16965.3248 | -0.0040 |
| 2 | 2 | 0 | 1 | 0  | 5 | 2 | 1 | 1 | 1 | 0  | 5 | 16965.3359 | -0.0018 |
| 2 | 2 | 0 | 1 | 6  | 3 | 2 | 1 | 1 | 1 | 6  | 3 | 16965.3572 | -0.0031 |
| 2 | 2 | 0 | 1 | 11 | 2 | 2 | 1 | 1 | 1 | 11 | 2 | 16973.1649 | 0.0000  |
| 2 | 2 | 0 | 1 | 8  | 3 | 2 | 1 | 1 | 1 | 8  | 3 | 16973.1732 | 0.0012  |
| 2 | 2 | 0 | 1 | 2  | 4 | 2 | 1 | 1 | 1 | 7  | 3 | 16975.0189 | 0.0024  |
| 2 | 2 | 0 | 1 | 1  | 4 | 2 | 1 | 1 | 1 | 5  | 3 | 16975.0702 | 0.0038  |
| 2 | 2 | 0 | 1 | 0  | 5 | 2 | 1 | 1 | 1 | 3  | 4 | 16975.0819 | 0.0036  |
| 2 | 2 | 0 | 1 | 9  | 2 | 2 | 1 | 1 | 1 | 15 | 1 | 16975.0924 | 0.0082  |
| 2 | 2 | 0 | 1 | 6  | 3 | 2 | 1 | 1 | 1 | 12 | 2 | 16975.1007 | 0.0000  |
| 2 | 2 | 0 | 1 | 13 | 2 | 2 | 1 | 1 | 1 | 7  | 3 | 16980.1263 | -0.0042 |
| 2 | 2 | 0 | 1 | 11 | 2 | 2 | 1 | 1 | 1 | 5  | 3 | 16980.1320 | -0.0022 |
| 2 | 2 | 0 | 1 | 8  | 3 | 2 | 1 | 1 | 1 | 3  | 4 | 16980.1378 | -0.0015 |
| 2 | 2 | 0 | 1 | 10 | 2 | 2 | 1 | 1 | 1 | 4  | 3 | 16983.0699 | -0.0045 |
| 2 | 2 | 0 | 1 | 7  | 3 | 2 | 1 | 1 | 1 | 2  | 4 | 16983.0804 | -0.0036 |
| 2 | 2 | 0 | 1 | 5  | 3 | 2 | 1 | 1 | 1 | 1  | 4 | 16983.1072 | -0.0070 |
| 2 | 2 | 0 | 1 | 3  | 4 | 2 | 1 | 1 | 1 | 0  | 5 | 16983.1187 | -0.0046 |
| 2 | 2 | 0 | 1 | 15 | 1 | 2 | 1 | 1 | 1 | 9  | 2 | 16983.1345 | 0.0010  |
| 2 | 2 | 0 | 1 | 12 | 2 | 2 | 1 | 1 | 1 | 6  | 3 | 16983.1345 | -0.0047 |
| 2 | 2 | 0 | 1 | 3  | 4 | 2 | 1 | 1 | 1 | 8  | 3 | 16985.8997 | 0.0032  |
| 2 | 2 | 0 | 1 | 12 | 2 | 2 | 1 | 1 | 1 | 18 | 1 | 16985.9088 | 0.0045  |
| 2 | 2 | 0 | 1 | 10 | 2 | 2 | 1 | 1 | 1 | 10 | 2 | 16992.8232 | -0.0002 |
| 2 | 2 | 0 | 1 | 5  | 3 | 2 | 1 | 1 | 1 | 5  | 3 | 16992.8496 | -0.0022 |
| 2 | 2 | 0 | 1 | 3  | 4 | 2 | 1 | 1 | 1 | 3  | 4 | 16992.8642 | 0.0003  |
| 2 | 2 | 0 | 1 | 15 | 1 | 2 | 1 | 1 | 1 | 15 | 1 | 16992.8707 | 0.0026  |
| 2 | 2 | 0 | 1 | 12 | 2 | 2 | 1 | 1 | 1 | 12 | 2 | 16992.8735 | -0.0061 |

Table S7: Observed Transition Frequencies (in MHz) for (*E*)-CHDC<sup>35</sup>ClF

|   |   |   |   |    |   |   |   |   |   |    |   |            |         |
|---|---|---|---|----|---|---|---|---|---|----|---|------------|---------|
| 2 | 1 | 1 | 1 | 10 | 2 | 1 | 1 | 0 | 1 | 10 | 1 | 17821.6595 | 0.0002  |
| 2 | 1 | 1 | 1 | 7  | 3 | 1 | 1 | 0 | 1 | 7  | 2 | 17821.6658 | 0.0009  |
| 2 | 1 | 1 | 1 | 5  | 3 | 1 | 1 | 0 | 1 | 5  | 2 | 17821.6710 | 0.0030  |
| 2 | 1 | 1 | 1 | 3  | 4 | 1 | 1 | 0 | 1 | 3  | 3 | 17821.6777 | 0.0012  |
| 2 | 1 | 1 | 1 | 15 | 1 | 1 | 1 | 0 | 1 | 15 | 0 | 17821.6840 | 0.0030  |
| 2 | 1 | 1 | 1 | 12 | 2 | 1 | 1 | 0 | 1 | 12 | 1 | 17821.6918 | 0.0055  |
| 2 | 1 | 1 | 1 | 16 | 1 | 1 | 1 | 0 | 1 | 7  | 2 | 17828.6100 | -0.0015 |
| 2 | 1 | 1 | 1 | 11 | 2 | 1 | 1 | 0 | 1 | 10 | 1 | 17828.6141 | -0.0016 |
| 2 | 1 | 1 | 1 | 16 | 1 | 1 | 1 | 0 | 1 | 10 | 1 | 17828.6141 | -0.0016 |
| 2 | 1 | 1 | 1 | 13 | 2 | 1 | 1 | 0 | 1 | 7  | 2 | 17828.6227 | -0.0008 |
| 2 | 1 | 1 | 1 | 11 | 2 | 1 | 1 | 0 | 1 | 5  | 2 | 17828.6351 | -0.0021 |
| 2 | 1 | 1 | 1 | 8  | 3 | 1 | 1 | 0 | 1 | 3  | 3 | 17828.6417 | -0.0022 |
| 2 | 1 | 1 | 1 | 13 | 2 | 1 | 1 | 0 | 1 | 12 | 1 | 17828.6576 | -0.0041 |
| 2 | 1 | 1 | 1 | 18 | 1 | 1 | 1 | 0 | 1 | 12 | 1 | 17828.6576 | -0.0040 |
| 2 | 1 | 1 | 0 | 3  | 4 | 1 | 1 | 0 | 0 | 3  | 4 | 17830.2339 | 0.0001  |
| 2 | 1 | 1 | 0 | 3  | 3 | 1 | 1 | 0 | 0 | 3  | 4 | 17830.2458 | 0.0029  |
| 2 | 1 | 1 | 0 | 3  | 2 | 1 | 1 | 0 | 0 | 3  | 3 | 17830.2526 | 0.0008  |
| 2 | 1 | 1 | 0 | 3  | 4 | 1 | 1 | 0 | 0 | 3  | 3 | 17830.2526 | -0.0031 |
| 2 | 1 | 1 | 0 | 3  | 3 | 1 | 1 | 0 | 0 | 3  | 3 | 17830.2654 | 0.0006  |
| 2 | 1 | 1 | 0 | 2  | 1 | 1 | 1 | 0 | 0 | 3  | 2 | 17837.1881 | -0.0050 |
| 2 | 1 | 1 | 0 | 2  | 3 | 1 | 1 | 0 | 0 | 3  | 4 | 17837.1982 | -0.0043 |
| 2 | 1 | 1 | 0 | 2  | 2 | 1 | 1 | 0 | 0 | 3  | 3 | 17837.2193 | -0.0052 |
| 2 | 1 | 1 | 1 | 14 | 2 | 1 | 1 | 0 | 1 | 7  | 2 | 17838.3828 | -0.0031 |
| 2 | 1 | 1 | 1 | 19 | 1 | 1 | 1 | 0 | 1 | 7  | 2 | 17838.3828 | -0.0032 |
| 2 | 1 | 1 | 1 | 21 | 0 | 1 | 1 | 0 | 1 | 10 | 1 | 17838.3888 | -0.0013 |
| 2 | 1 | 1 | 1 | 14 | 2 | 1 | 1 | 0 | 1 | 3  | 3 | 17838.4016 | -0.0047 |
| 2 | 1 | 1 | 1 | 14 | 2 | 1 | 1 | 0 | 1 | 5  | 2 | 17838.4076 | -0.0040 |
| 2 | 1 | 1 | 1 | 19 | 1 | 1 | 1 | 0 | 1 | 12 | 1 | 17838.4184 | -0.0058 |
| 2 | 1 | 1 | 1 | 1  | 4 | 1 | 1 | 0 | 1 | 1  | 3 | 17839.9730 | 0.0033  |
| 2 | 1 | 1 | 1 | 0  | 5 | 1 | 1 | 0 | 1 | 0  | 4 | 17839.9799 | 0.0051  |
| 2 | 1 | 1 | 1 | 4  | 3 | 1 | 1 | 0 | 1 | 4  | 2 | 17840.0203 | 0.0038  |
| 2 | 1 | 1 | 1 | 2  | 4 | 1 | 1 | 0 | 1 | 2  | 3 | 17840.0263 | 0.0053  |
| 2 | 1 | 1 | 1 | 11 | 2 | 1 | 1 | 0 | 1 | 11 | 1 | 17844.0623 | 0.0022  |
| 2 | 1 | 1 | 1 | 16 | 1 | 1 | 1 | 0 | 1 | 16 | 0 | 17844.0680 | 0.0008  |
| 2 | 1 | 1 | 1 | 20 | 0 | 1 | 1 | 0 | 1 | 13 | 1 | 17844.0680 | 0.0008  |
| 2 | 1 | 1 | 1 | 8  | 3 | 1 | 1 | 0 | 1 | 8  | 2 | 17844.0800 | 0.0008  |
| 2 | 1 | 1 | 1 | 17 | 1 | 1 | 1 | 0 | 1 | 16 | 0 | 17853.8257 | -0.0010 |
| 2 | 1 | 1 | 1 | 21 | 0 | 1 | 1 | 0 | 1 | 11 | 1 | 17853.8330 | -0.0015 |
| 2 | 1 | 1 | 1 | 14 | 2 | 1 | 1 | 0 | 1 | 13 | 1 | 17853.8408 | -0.0008 |
| 2 | 1 | 1 | 1 | 14 | 2 | 1 | 1 | 0 | 1 | 8  | 2 | 17853.8408 | -0.0009 |
| 2 | 1 | 1 | 1 | 19 | 1 | 1 | 1 | 0 | 1 | 8  | 2 | 17853.8408 | -0.0009 |
| 3 | 0 | 3 | 0 | 4  | 3 | 2 | 1 | 2 | 0 | 4  | 3 | 19065.0873 | -0.0024 |
| 3 | 0 | 3 | 0 | 4  | 5 | 2 | 1 | 2 | 0 | 4  | 5 | 19065.0908 | -0.0023 |
| 3 | 0 | 3 | 0 | 4  | 4 | 2 | 1 | 2 | 0 | 4  | 4 | 19065.1031 | -0.0008 |

Table S7: Observed Transition Frequencies (in MHz) for (*E*)-CHDC<sup>35</sup>CIF

|   |   |   |   |    |   |   |   |   |   |    |   |            |         |
|---|---|---|---|----|---|---|---|---|---|----|---|------------|---------|
| 3 | 0 | 3 | 1 | 15 | 2 | 2 | 1 | 2 | 1 | 15 | 1 | 19073.6428 | 0.0018  |
| 3 | 0 | 3 | 1 | 12 | 3 | 2 | 1 | 2 | 1 | 12 | 2 | 19073.6510 | 0.0053  |
| 3 | 0 | 3 | 1 | 5  | 4 | 2 | 1 | 2 | 1 | 5  | 3 | 19073.6510 | 0.0030  |
| 3 | 0 | 3 | 1 | 3  | 5 | 2 | 1 | 2 | 1 | 3  | 4 | 19073.6551 | 0.0037  |
| 3 | 0 | 3 | 1 | 10 | 3 | 2 | 1 | 2 | 1 | 10 | 2 | 19073.6773 | 0.0022  |
| 3 | 0 | 3 | 1 | 7  | 4 | 2 | 1 | 2 | 1 | 7  | 3 | 19073.6829 | 0.0032  |
| 3 | 0 | 3 | 1 | 18 | 2 | 2 | 1 | 2 | 1 | 18 | 1 | 19075.5106 | -0.0019 |
| 3 | 0 | 3 | 1 | 11 | 3 | 2 | 1 | 2 | 1 | 11 | 2 | 19075.5236 | 0.0007  |
| 3 | 0 | 3 | 1 | 8  | 4 | 2 | 1 | 2 | 1 | 8  | 3 | 19075.5285 | 0.0015  |
| 3 | 0 | 3 | 1 | 16 | 2 | 2 | 1 | 2 | 1 | 16 | 1 | 19075.5577 | 0.0033  |
| 3 | 0 | 3 | 1 | 13 | 3 | 2 | 1 | 2 | 1 | 13 | 2 | 19075.5577 | 0.0007  |
| 3 | 0 | 3 | 0 | 3  | 2 | 2 | 1 | 2 | 0 | 3  | 2 | 19081.6453 | -0.0046 |
| 3 | 0 | 3 | 0 | 3  | 4 | 2 | 1 | 2 | 0 | 3  | 4 | 19081.6579 | -0.0003 |
| 3 | 0 | 3 | 0 | 3  | 3 | 2 | 1 | 2 | 0 | 3  | 3 | 19081.6754 | -0.0022 |
| 3 | 0 | 3 | 1 | 6  | 4 | 2 | 1 | 2 | 1 | 6  | 3 | 19082.2237 | 0.0086  |
| 3 | 0 | 3 | 1 | 1  | 5 | 2 | 1 | 2 | 1 | 1  | 4 | 19082.2237 | 0.0069  |
| 3 | 0 | 3 | 1 | 0  | 6 | 2 | 1 | 2 | 1 | 0  | 5 | 19082.2237 | 0.0045  |
| 3 | 0 | 3 | 1 | 4  | 4 | 2 | 1 | 2 | 1 | 4  | 3 | 19082.2494 | 0.0051  |
| 3 | 0 | 3 | 1 | 4  | 4 | 2 | 1 | 2 | 1 | 4  | 3 | 19082.2522 | 0.0079  |
| 3 | 0 | 3 | 1 | 2  | 5 | 2 | 1 | 2 | 1 | 2  | 4 | 19082.2522 | 0.0051  |
| 3 | 0 | 3 | 1 | 22 | 1 | 2 | 1 | 2 | 1 | 19 | 1 | 19084.0288 | 0.0005  |
| 3 | 0 | 3 | 1 | 17 | 2 | 2 | 1 | 2 | 1 | 14 | 2 | 19084.0425 | -0.0041 |
| 3 | 0 | 3 | 1 | 17 | 2 | 2 | 1 | 2 | 1 | 17 | 1 | 19084.0602 | 0.0013  |
| 3 | 0 | 3 | 1 | 14 | 3 | 2 | 1 | 2 | 1 | 14 | 2 | 19084.0602 | -0.0010 |
| 3 | 0 | 3 | 1 | 21 | 1 | 2 | 1 | 2 | 1 | 21 | 0 | 19084.0833 | -0.0024 |
| 3 | 0 | 3 | 1 | 19 | 2 | 2 | 1 | 2 | 1 | 19 | 1 | 19084.0962 | -0.0008 |
| 3 | 0 | 3 | 1 | 19 | 2 | 2 | 1 | 2 | 1 | 14 | 2 | 19084.0962 | -0.0009 |
| 3 | 0 | 3 | 1 | 17 | 2 | 2 | 1 | 2 | 1 | 11 | 2 | 19092.6355 | -0.0023 |
| 3 | 0 | 3 | 1 | 14 | 3 | 2 | 1 | 2 | 1 | 8  | 3 | 19092.6411 | -0.0015 |
| 3 | 0 | 3 | 1 | 21 | 1 | 2 | 1 | 2 | 1 | 16 | 1 | 19092.6765 | -0.0004 |
| 3 | 0 | 3 | 1 | 19 | 2 | 2 | 1 | 2 | 1 | 13 | 2 | 19092.6765 | -0.0020 |
| 2 | 1 | 2 | 1 | 11 | 2 | 1 | 0 | 1 | 1 | 11 | 1 | 20296.5204 | -0.0007 |
| 2 | 1 | 2 | 1 | 8  | 3 | 1 | 0 | 1 | 1 | 8  | 2 | 20296.5356 | 0.0013  |
| 2 | 1 | 2 | 0 | 2  | 2 | 1 | 0 | 1 | 0 | 3  | 3 | 20311.1648 | -0.0044 |
| 2 | 1 | 2 | 0 | 2  | 3 | 1 | 0 | 1 | 0 | 3  | 4 | 20311.2045 | -0.0042 |
| 2 | 1 | 2 | 1 | 6  | 3 | 1 | 0 | 1 | 1 | 2  | 3 | 20313.5892 | 0.0023  |
| 2 | 1 | 2 | 1 | 4  | 3 | 1 | 0 | 1 | 1 | 4  | 2 | 20313.6177 | 0.0008  |
| 2 | 1 | 2 | 1 | 2  | 4 | 1 | 0 | 1 | 1 | 2  | 3 | 20313.6255 | 0.0011  |
| 2 | 1 | 2 | 1 | 1  | 4 | 1 | 0 | 1 | 1 | 1  | 3 | 20313.6255 | -0.0020 |
| 2 | 1 | 2 | 1 | 0  | 5 | 1 | 0 | 1 | 1 | 0  | 4 | 20313.6383 | 0.0030  |
| 2 | 1 | 2 | 1 | 6  | 3 | 1 | 0 | 1 | 1 | 6  | 2 | 20313.6490 | 0.0054  |
| 2 | 1 | 2 | 1 | 15 | 1 | 1 | 0 | 1 | 1 | 15 | 0 | 20323.3415 | 0.0018  |
| 2 | 1 | 2 | 1 | 12 | 2 | 1 | 0 | 1 | 1 | 12 | 1 | 20323.3509 | 0.0039  |
| 2 | 1 | 2 | 1 | 5  | 3 | 1 | 0 | 1 | 1 | 5  | 2 | 20323.3764 | 0.0017  |

Table S7: Observed Transition Frequencies (in MHz) for (*E*)-CHDC<sup>35</sup>CIF

|   |   |   |   |    |   |   |   |   |   |    |   |            |         |
|---|---|---|---|----|---|---|---|---|---|----|---|------------|---------|
| 2 | 1 | 2 | 1 | 3  | 4 | 1 | 0 | 1 | 1 | 3  | 3 | 20323.3858 | 0.0022  |
| 2 | 1 | 2 | 1 | 10 | 2 | 1 | 0 | 1 | 1 | 10 | 1 | 20323.4276 | 0.0024  |
| 2 | 1 | 2 | 1 | 7  | 3 | 1 | 0 | 1 | 1 | 7  | 2 | 20323.4365 | 0.0040  |
| 2 | 1 | 2 | 1 | 13 | 2 | 1 | 0 | 1 | 1 | 12 | 1 | 20329.4870 | 0.0007  |
| 2 | 1 | 2 | 1 | 18 | 1 | 1 | 0 | 1 | 1 | 12 | 1 | 20329.4870 | 0.0008  |
| 2 | 1 | 2 | 1 | 11 | 2 | 1 | 0 | 1 | 1 | 5  | 2 | 20329.5070 | -0.0016 |
| 2 | 1 | 2 | 1 | 8  | 3 | 1 | 0 | 1 | 1 | 3  | 3 | 20329.5158 | -0.0002 |
| 2 | 1 | 2 | 1 | 11 | 2 | 1 | 0 | 1 | 1 | 10 | 1 | 20329.5442 | -0.0020 |
| 2 | 1 | 2 | 1 | 16 | 1 | 1 | 0 | 1 | 1 | 10 | 1 | 20329.5442 | -0.0020 |
| 2 | 1 | 2 | 1 | 13 | 2 | 1 | 0 | 1 | 1 | 7  | 2 | 20329.5536 | -0.0004 |
| 2 | 1 | 2 | 1 | 10 | 2 | 1 | 0 | 1 | 1 | 4  | 2 | 20305.0470 | 0.0019  |
| 2 | 1 | 2 | 1 | 7  | 3 | 1 | 0 | 1 | 1 | 2  | 3 | 20305.0470 | -0.0020 |
| 2 | 1 | 2 | 1 | 5  | 3 | 1 | 0 | 1 | 1 | 1  | 3 | 20305.0696 | -0.0024 |
| 2 | 1 | 2 | 1 | 3  | 4 | 1 | 0 | 1 | 1 | 0  | 4 | 20305.0751 | -0.0023 |
| 2 | 1 | 2 | 1 | 12 | 2 | 1 | 0 | 1 | 1 | 6  | 2 | 20305.0876 | -0.0004 |
| 2 | 1 | 2 | 1 | 17 | 1 | 1 | 0 | 1 | 1 | 11 | 1 | 20305.1021 | 0.0020  |
| 2 | 1 | 2 | 1 | 17 | 1 | 1 | 0 | 1 | 1 | 16 | 0 | 20305.1021 | -0.0015 |
| 2 | 1 | 2 | 1 | 14 | 2 | 1 | 0 | 1 | 1 | 8  | 2 | 20305.1149 | -0.0008 |
| 2 | 1 | 2 | 1 | 19 | 1 | 1 | 0 | 1 | 1 | 8  | 2 | 20305.1149 | -0.0009 |
| 2 | 1 | 2 | 1 | 14 | 2 | 1 | 0 | 1 | 1 | 13 | 1 | 20305.1149 | -0.0009 |
| 2 | 1 | 2 | 1 | 17 | 1 | 1 | 0 | 1 | 1 | 15 | 0 | 20338.0569 | -0.0008 |
| 2 | 1 | 2 | 1 | 19 | 1 | 1 | 0 | 1 | 1 | 12 | 1 | 20338.0679 | 0.0002  |
| 2 | 1 | 2 | 1 | 17 | 1 | 1 | 0 | 1 | 1 | 5  | 2 | 20338.0854 | -0.0021 |
| 2 | 1 | 2 | 1 | 14 | 2 | 1 | 0 | 1 | 1 | 3  | 3 | 20338.0962 | -0.0011 |
| 2 | 1 | 2 | 1 | 17 | 1 | 1 | 0 | 1 | 1 | 10 | 1 | 20338.1209 | -0.0042 |
| 2 | 1 | 2 | 1 | 14 | 2 | 1 | 0 | 1 | 1 | 7  | 2 | 20338.1339 | -0.0015 |
| 2 | 1 | 2 | 1 | 19 | 1 | 1 | 0 | 1 | 1 | 7  | 2 | 20338.1339 | -0.0016 |
| 2 | 2 | 1 | 1 | 17 | 1 | 2 | 1 | 2 | 1 | 21 | 0 | 21295.8768 | 0.0029  |
| 2 | 2 | 1 | 1 | 14 | 2 | 2 | 1 | 2 | 1 | 19 | 1 | 21295.8969 | -0.0005 |
| 2 | 2 | 1 | 1 | 19 | 1 | 2 | 1 | 2 | 1 | 14 | 2 | 21295.8969 | -0.0006 |
| 2 | 2 | 1 | 1 | 14 | 2 | 2 | 1 | 2 | 1 | 14 | 2 | 21295.8969 | -0.0006 |
| 2 | 2 | 1 | 1 | 21 | 0 | 2 | 1 | 2 | 1 | 17 | 1 | 21295.9098 | 0.0002  |
| 2 | 2 | 1 | 1 | 17 | 1 | 2 | 1 | 2 | 1 | 11 | 2 | 21304.4624 | -0.0028 |
| 2 | 2 | 1 | 1 | 14 | 2 | 2 | 1 | 2 | 1 | 8  | 3 | 21304.4774 | -0.0015 |
| 2 | 2 | 1 | 1 | 11 | 2 | 2 | 1 | 2 | 1 | 17 | 1 | 21314.2152 | 0.0005  |
| 2 | 2 | 1 | 1 | 8  | 3 | 2 | 1 | 2 | 1 | 14 | 2 | 21314.2234 | 0.0021  |
| 2 | 2 | 1 | 1 | 4  | 3 | 2 | 1 | 2 | 1 | 4  | 3 | 21315.0654 | 0.0002  |
| 2 | 2 | 1 | 1 | 2  | 4 | 2 | 1 | 2 | 1 | 2  | 4 | 21315.0767 | -0.0002 |
| 2 | 2 | 1 | 1 | 1  | 4 | 2 | 1 | 2 | 1 | 1  | 4 | 21315.1454 | -0.0016 |
| 2 | 2 | 1 | 1 | 0  | 5 | 2 | 1 | 2 | 1 | 0  | 5 | 21315.1570 | -0.0016 |
| 2 | 2 | 1 | 1 | 6  | 3 | 2 | 1 | 2 | 1 | 6  | 3 | 21315.1789 | -0.0035 |
| 2 | 2 | 1 | 1 | 11 | 2 | 2 | 1 | 2 | 1 | 11 | 2 | 21322.7931 | -0.0006 |
| 2 | 2 | 1 | 1 | 8  | 3 | 2 | 1 | 2 | 1 | 8  | 3 | 21322.8038 | 0.0011  |
| 2 | 2 | 1 | 1 | 4  | 3 | 2 | 1 | 2 | 1 | 10 | 2 | 21323.6411 | 0.0042  |

Table S7: Observed Transition Frequencies (in MHz) for (*E*)-CHDC<sup>35</sup>CIF

|   |   |   |   |    |   |   |   |   |   |    |   |            |         |
|---|---|---|---|----|---|---|---|---|---|----|---|------------|---------|
| 2 | 2 | 1 | 1 | 2  | 4 | 2 | 1 | 2 | 1 | 7  | 3 | 21323.6553 | 0.0030  |
| 2 | 2 | 1 | 1 | 1  | 4 | 2 | 1 | 2 | 1 | 5  | 3 | 21323.7078 | 0.0054  |
| 2 | 2 | 1 | 1 | 0  | 5 | 2 | 1 | 2 | 1 | 3  | 4 | 21323.7192 | 0.0026  |
| 2 | 2 | 1 | 1 | 13 | 2 | 2 | 1 | 2 | 1 | 7  | 3 | 21328.9211 | -0.0030 |
| 2 | 2 | 1 | 1 | 11 | 2 | 2 | 1 | 2 | 1 | 5  | 3 | 21328.9211 | -0.0064 |
| 2 | 2 | 1 | 1 | 8  | 3 | 2 | 1 | 2 | 1 | 3  | 4 | 21328.9338 | -0.0012 |
| 2 | 2 | 1 | 1 | 18 | 1 | 2 | 1 | 2 | 1 | 12 | 2 | 21328.9420 | 0.0001  |
| 2 | 2 | 1 | 1 | 10 | 2 | 2 | 1 | 2 | 1 | 4  | 3 | 21333.4163 | -0.0030 |
| 2 | 2 | 1 | 1 | 5  | 3 | 2 | 1 | 2 | 1 | 1  | 4 | 21333.4715 | -0.0019 |
| 2 | 2 | 1 | 1 | 3  | 4 | 2 | 1 | 2 | 1 | 0  | 5 | 21333.4715 | -0.0046 |
| 2 | 2 | 1 | 1 | 12 | 2 | 2 | 1 | 2 | 1 | 6  | 3 | 21333.4872 | -0.0060 |
| 2 | 2 | 1 | 1 | 7  | 3 | 2 | 1 | 2 | 1 | 13 | 2 | 21335.8744 | -0.0014 |
| 2 | 2 | 1 | 1 | 5  | 3 | 2 | 1 | 2 | 1 | 8  | 3 | 21335.8827 | -0.0025 |
| 2 | 2 | 1 | 1 | 15 | 1 | 2 | 1 | 2 | 1 | 18 | 1 | 21335.8857 | -0.0026 |
| 2 | 2 | 1 | 1 | 5  | 3 | 2 | 1 | 2 | 1 | 11 | 2 | 21335.8935 | -0.0016 |
| 2 | 2 | 1 | 1 | 3  | 4 | 2 | 1 | 2 | 1 | 8  | 3 | 21335.9045 | 0.0028  |
| 2 | 2 | 1 | 1 | 12 | 2 | 2 | 1 | 2 | 1 | 18 | 1 | 21335.9142 | 0.0046  |
| 2 | 2 | 1 | 1 | 10 | 2 | 2 | 1 | 2 | 1 | 10 | 2 | 21341.9927 | 0.0016  |
| 2 | 2 | 1 | 1 | 5  | 3 | 2 | 1 | 2 | 1 | 5  | 3 | 21342.0283 | -0.0006 |
| 2 | 2 | 1 | 1 | 3  | 4 | 2 | 1 | 2 | 1 | 3  | 4 | 21342.0349 | 0.0008  |
| 2 | 2 | 1 | 1 | 12 | 2 | 2 | 1 | 2 | 1 | 12 | 2 | 21342.0522 | 0.0034  |

Table S8: Observed Transition Frequencies (in MHz) for (Z)-CHDC<sup>35</sup>ClF

| $J'$ | $K_a'$ | $K_c'$ | $s'$ | $m_1'$ | $m_2'$ | $J''$ | $K_a''$ | $K_c''$ | $s''$ | $m_1''$ | $m_2''$ | Observed  | Obs - Calc |
|------|--------|--------|------|--------|--------|-------|---------|---------|-------|---------|---------|-----------|------------|
| 1    | 1      | 0      | 1    | 16     | 0      | 1     | 0       | 1       | 1     | 11      | 1       | 6354.2785 | -0.0015    |
| 1    | 1      | 0      | 1    | 8      | 2      | 1     | 0       | 1       | 1     | 8       | 2       | 6354.2827 | -0.0009    |
| 1    | 1      | 0      | 1    | 8      | 2      | 1     | 0       | 1       | 1     | 13      | 1       | 6354.2827 | -0.0009    |
| 1    | 1      | 0      | 1    | 13     | 1      | 1     | 0       | 1       | 1     | 8       | 2       | 6354.2827 | -0.0009    |
| 1    | 1      | 0      | 1    | 11     | 1      | 1     | 0       | 1       | 1     | 16      | 0       | 6354.2908 | 0.0001     |
| 1    | 1      | 0      | 1    | 15     | 0      | 1     | 0       | 1       | 1     | 13      | 1       | 6369.7070 | 0.0007     |
| 1    | 1      | 0      | 1    | 12     | 1      | 1     | 0       | 1       | 1     | 13      | 1       | 6369.7147 | 0.0038     |
| 1    | 1      | 0      | 1    | 5      | 2      | 1     | 0       | 1       | 1     | 11      | 1       | 6369.7188 | -0.0005    |
| 1    | 1      | 0      | 1    | 5      | 2      | 1     | 0       | 1       | 1     | 8       | 2       | 6369.7255 | 0.0026     |
| 1    | 1      | 0      | 1    | 3      | 3      | 1     | 0       | 1       | 1     | 8       | 2       | 6369.7305 | 0.0023     |
| 1    | 1      | 0      | 1    | 10     | 1      | 1     | 0       | 1       | 1     | 11      | 1       | 6369.7459 | 0.0056     |
| 1    | 1      | 0      | 1    | 10     | 1      | 1     | 0       | 1       | 1     | 16      | 0       | 6369.7459 | 0.0020     |
| 1    | 1      | 0      | 1    | 7      | 2      | 1     | 0       | 1       | 1     | 8       | 2       | 6369.7493 | 0.0013     |
| 1    | 1      | 0      | 1    | 7      | 2      | 1     | 0       | 1       | 1     | 13      | 1       | 6369.7493 | 0.0013     |
| 1    | 1      | 0      | 1    | 4      | 2      | 1     | 0       | 1       | 1     | 4       | 2       | 6375.7998 | 0.0007     |
| 1    | 1      | 0      | 1    | 2      | 3      | 1     | 0       | 1       | 1     | 2       | 3       | 6375.8043 | -0.0005    |
| 1    | 1      | 0      | 1    | 1      | 3      | 1     | 0       | 1       | 1     | 1       | 3       | 6375.8108 | -0.0017    |
| 1    | 1      | 0      | 1    | 0      | 4      | 1     | 0       | 1       | 1     | 0       | 4       | 6375.8165 | -0.0020    |
| 1    | 1      | 0      | 1    | 6      | 2      | 1     | 0       | 1       | 1     | 6       | 2       | 6375.8229 | -0.0010    |
| 1    | 1      | 0      | 1    | 0      | 4      | 1     | 0       | 1       | 1     | 2       | 3       | 6375.8269 | -0.0005    |
| 1    | 1      | 0      | 1    | 9      | 1      | 1     | 0       | 1       | 1     | 4       | 2       | 6375.8269 | -0.0020    |
| 1    | 1      | 0      | 1    | 6      | 2      | 1     | 0       | 1       | 1     | 9       | 1       | 6375.8269 | -0.0033    |
| 1    | 1      | 0      | 0    | 2      | 1      | 1     | 0       | 1       | 0     | 3       | 2       | 6384.3573 | -0.0054    |
| 1    | 1      | 0      | 0    | 2      | 3      | 1     | 0       | 1       | 0     | 3       | 4       | 6384.3774 | -0.0048    |
| 1    | 1      | 0      | 0    | 2      | 2      | 1     | 0       | 1       | 0     | 3       | 3       | 6384.4073 | -0.0030    |
| 1    | 1      | 0      | 1    | 8      | 2      | 1     | 0       | 1       | 1     | 7       | 2       | 6387.2411 | -0.0026    |
| 1    | 1      | 0      | 1    | 13     | 1      | 1     | 0       | 1       | 1     | 7       | 2       | 6387.2411 | -0.0026    |
| 1    | 1      | 0      | 1    | 8      | 2      | 1     | 0       | 1       | 1     | 3       | 3       | 6387.2508 | -0.0001    |
| 1    | 1      | 0      | 1    | 13     | 1      | 1     | 0       | 1       | 1     | 12      | 1       | 6387.2572 | -0.0004    |
| 1    | 1      | 0      | 1    | 11     | 1      | 1     | 0       | 1       | 1     | 5       | 2       | 6387.2632 | 0.0024     |
| 1    | 1      | 0      | 1    | 2      | 3      | 1     | 0       | 1       | 1     | 7       | 2       | 6394.1050 | 0.0024     |
| 1    | 1      | 0      | 1    | 1      | 3      | 1     | 0       | 1       | 1     | 5       | 2       | 6394.1281 | 0.0045     |
| 1    | 1      | 0      | 1    | 0      | 4      | 1     | 0       | 1       | 1     | 3       | 3       | 6394.1351 | 0.0026     |
| 1    | 1      | 0      | 1    | 6      | 2      | 1     | 0       | 1       | 1     | 12      | 1       | 6394.1500 | 0.0025     |
| 1    | 1      | 0      | 1    | 12     | 1      | 1     | 0       | 1       | 1     | 7       | 2       | 6402.6722 | 0.0012     |
| 1    | 1      | 0      | 1    | 15     | 0      | 1     | 0       | 1       | 1     | 12      | 1       | 6402.6756 | -0.0047    |
| 1    | 1      | 0      | 1    | 5      | 2      | 1     | 0       | 1       | 1     | 10      | 1       | 6402.6812 | -0.0040    |
| 1    | 1      | 0      | 1    | 12     | 1      | 1     | 0       | 1       | 1     | 12      | 1       | 6402.6812 | -0.0037    |
| 1    | 1      | 0      | 1    | 3      | 3      | 1     | 0       | 1       | 1     | 7       | 2       | 6402.6843 | -0.0040    |
| 1    | 1      | 0      | 1    | 5      | 2      | 1     | 0       | 1       | 1     | 5       | 2       | 6402.6932 | 0.0002     |
| 1    | 1      | 0      | 1    | 3      | 3      | 1     | 0       | 1       | 1     | 3       | 3       | 6402.6979 | 0.0023     |
| 1    | 1      | 0      | 1    | 7      | 2      | 1     | 0       | 1       | 1     | 7       | 2       | 6402.7091 | 0.0010     |
| 1    | 1      | 0      | 1    | 7      | 2      | 1     | 0       | 1       | 1     | 3       | 3       | 6402.7203 | 0.0049     |

Table S8: Observed Transition Frequencies (in MHz) for (Z)-CHDC<sup>35</sup>ClF

|   |   |   |   |    |   |   |   |   |   |    |   |           |         |
|---|---|---|---|----|---|---|---|---|---|----|---|-----------|---------|
| 1 | 1 | 0 | 1 | 7  | 2 | 1 | 0 | 1 | 1 | 12 | 1 | 6402.7221 | 0.0001  |
| 1 | 0 | 1 | 0 | 2  | 1 | 0 | 0 | 0 | 0 | 2  | 2 | 8389.8582 | -0.0021 |
| 1 | 0 | 1 | 0 | 2  | 1 | 0 | 0 | 0 | 0 | 2  | 1 | 8389.8582 | -0.0022 |
| 1 | 0 | 1 | 0 | 2  | 3 | 0 | 0 | 0 | 0 | 2  | 3 | 8389.8654 | -0.0009 |
| 1 | 0 | 1 | 0 | 2  | 2 | 0 | 0 | 0 | 0 | 2  | 2 | 8389.8737 | -0.0001 |
| 1 | 0 | 1 | 1 | 4  | 2 | 0 | 0 | 0 | 1 | 4  | 1 | 8408.1691 | 0.0018  |
| 1 | 0 | 1 | 1 | 2  | 3 | 0 | 0 | 0 | 1 | 2  | 2 | 8408.1748 | 0.0023  |
| 1 | 0 | 1 | 1 | 1  | 3 | 0 | 0 | 0 | 1 | 1  | 2 | 8408.1779 | 0.0020  |
| 1 | 0 | 1 | 1 | 9  | 1 | 0 | 0 | 0 | 1 | 9  | 0 | 8408.1809 | 0.0027  |
| 1 | 0 | 1 | 1 | 0  | 4 | 0 | 0 | 0 | 1 | 0  | 3 | 8408.1845 | 0.0031  |
| 1 | 0 | 1 | 1 | 6  | 2 | 0 | 0 | 0 | 1 | 6  | 1 | 8408.1882 | 0.0037  |
| 1 | 0 | 1 | 0 | 1  | 2 | 0 | 0 | 0 | 0 | 2  | 3 | 8422.8336 | -0.0021 |
| 2 | 1 | 1 | 1 | 20 | 0 | 2 | 0 | 2 | 1 | 19 | 1 | 8518.1946 | -0.0015 |
| 2 | 1 | 1 | 1 | 16 | 1 | 2 | 0 | 2 | 1 | 21 | 0 | 8518.1946 | -0.0017 |
| 2 | 1 | 1 | 1 | 11 | 2 | 2 | 0 | 2 | 1 | 17 | 1 | 8518.1994 | -0.0073 |
| 2 | 1 | 1 | 1 | 8  | 3 | 2 | 0 | 2 | 1 | 14 | 2 | 8518.2093 | 0.0005  |
| 2 | 1 | 1 | 0 | 3  | 3 | 2 | 0 | 2 | 0 | 4  | 4 | 8523.7273 | -0.0067 |
| 2 | 1 | 1 | 0 | 3  | 3 | 2 | 0 | 2 | 0 | 4  | 3 | 8523.7354 | 0.0012  |
| 2 | 1 | 1 | 0 | 3  | 4 | 2 | 0 | 2 | 0 | 4  | 5 | 8523.7429 | -0.0062 |
| 2 | 1 | 1 | 0 | 3  | 2 | 2 | 0 | 2 | 0 | 4  | 3 | 8523.7496 | -0.0058 |
| 2 | 1 | 1 | 1 | 17 | 1 | 2 | 0 | 2 | 1 | 21 | 0 | 8527.9404 | 0.0027  |
| 2 | 1 | 1 | 1 | 14 | 2 | 2 | 0 | 2 | 1 | 14 | 2 | 8527.9528 | -0.0006 |
| 2 | 1 | 1 | 1 | 14 | 2 | 2 | 0 | 2 | 1 | 19 | 1 | 8527.9528 | -0.0006 |
| 2 | 1 | 1 | 1 | 19 | 1 | 2 | 0 | 2 | 1 | 14 | 2 | 8527.9528 | -0.0006 |
| 2 | 1 | 1 | 1 | 21 | 0 | 2 | 0 | 2 | 1 | 17 | 1 | 8527.9630 | -0.0010 |
| 2 | 1 | 1 | 1 | 10 | 2 | 2 | 0 | 2 | 1 | 16 | 1 | 8528.7079 | 0.0003  |
| 2 | 1 | 1 | 1 | 7  | 3 | 2 | 0 | 2 | 1 | 13 | 2 | 8528.7146 | 0.0044  |
| 2 | 1 | 1 | 1 | 5  | 3 | 2 | 0 | 2 | 1 | 11 | 2 | 8528.7263 | 0.0012  |
| 2 | 1 | 1 | 1 | 3  | 4 | 2 | 0 | 2 | 1 | 8  | 3 | 8528.7306 | 0.0023  |
| 2 | 1 | 1 | 1 | 12 | 2 | 2 | 0 | 2 | 1 | 18 | 1 | 8528.7374 | 0.0034  |
| 2 | 1 | 1 | 1 | 2  | 4 | 2 | 0 | 2 | 1 | 2  | 4 | 8533.4431 | -0.0010 |
| 2 | 1 | 1 | 1 | 1  | 4 | 2 | 0 | 2 | 1 | 1  | 4 | 8533.4790 | 0.0007  |
| 2 | 1 | 1 | 1 | 0  | 5 | 2 | 0 | 2 | 1 | 0  | 5 | 8533.4826 | -0.0008 |
| 2 | 1 | 1 | 1 | 6  | 3 | 2 | 0 | 2 | 1 | 6  | 3 | 8533.4945 | 0.0001  |
| 2 | 1 | 1 | 1 | 11 | 2 | 2 | 0 | 2 | 1 | 11 | 2 | 8535.6723 | -0.0004 |
| 2 | 1 | 1 | 1 | 8  | 3 | 2 | 0 | 2 | 1 | 8  | 3 | 8535.6764 | -0.0005 |
| 2 | 1 | 1 | 0 | 3  | 3 | 2 | 0 | 2 | 0 | 3  | 3 | 8541.2150 | -0.0004 |
| 2 | 1 | 1 | 0 | 3  | 4 | 2 | 0 | 2 | 0 | 3  | 4 | 8541.2315 | 0.0011  |
| 2 | 1 | 1 | 0 | 3  | 2 | 2 | 0 | 2 | 0 | 3  | 2 | 8541.2383 | 0.0016  |
| 2 | 1 | 1 | 1 | 17 | 1 | 2 | 0 | 2 | 1 | 11 | 2 | 8545.4129 | -0.0013 |
| 2 | 1 | 1 | 1 | 14 | 2 | 2 | 0 | 2 | 1 | 8  | 3 | 8545.4198 | -0.0017 |
| 2 | 1 | 1 | 1 | 19 | 1 | 2 | 0 | 2 | 1 | 20 | 0 | 8545.4303 | 0.0004  |
| 2 | 1 | 1 | 1 | 21 | 0 | 2 | 0 | 2 | 1 | 16 | 1 | 8545.4303 | 0.0003  |
| 2 | 1 | 1 | 0 | 2  | 2 | 2 | 0 | 2 | 0 | 3  | 3 | 8548.1768 | -0.0036 |

Table S8: Observed Transition Frequencies (in MHz) for (Z)-CHDC<sup>35</sup>ClF

|   |   |   |   |    |   |   |   |   |   |    |   |            |         |
|---|---|---|---|----|---|---|---|---|---|----|---|------------|---------|
| 2 | 1 | 1 | 0 | 2  | 3 | 2 | 0 | 2 | 0 | 3  | 4 | 8548.1768  | -0.0036 |
| 2 | 1 | 1 | 1 | 4  | 3 | 2 | 0 | 2 | 1 | 10 | 2 | 8550.9244  | 0.0045  |
| 2 | 1 | 1 | 1 | 2  | 4 | 2 | 0 | 2 | 1 | 7  | 3 | 8550.9318  | 0.0052  |
| 2 | 1 | 1 | 1 | 1  | 4 | 2 | 0 | 2 | 1 | 5  | 3 | 8550.9637  | 0.0051  |
| 2 | 1 | 1 | 1 | 0  | 5 | 2 | 0 | 2 | 1 | 3  | 4 | 8550.9711  | 0.0054  |
| 2 | 1 | 1 | 1 | 9  | 2 | 2 | 0 | 2 | 1 | 15 | 1 | 8550.9777  | 0.0085  |
| 2 | 1 | 1 | 1 | 6  | 3 | 2 | 0 | 2 | 1 | 12 | 2 | 8550.9819  | 0.0052  |
| 3 | 1 | 2 | 0 | 4  | 4 | 3 | 1 | 3 | 0 | 5  | 5 | 10404.6405 | -0.0075 |
| 3 | 1 | 2 | 0 | 4  | 5 | 3 | 1 | 3 | 0 | 5  | 6 | 10404.7018 | -0.0061 |
| 3 | 1 | 2 | 0 | 4  | 3 | 3 | 1 | 3 | 0 | 5  | 4 | 10404.7183 | -0.0051 |
| 3 | 1 | 2 | 0 | 3  | 3 | 3 | 1 | 3 | 0 | 2  | 2 | 10405.1326 | 0.0047  |
| 3 | 1 | 2 | 0 | 3  | 4 | 3 | 1 | 3 | 0 | 2  | 3 | 10405.1737 | 0.0033  |
| 3 | 1 | 2 | 0 | 3  | 2 | 3 | 1 | 3 | 0 | 2  | 1 | 10405.1983 | 0.0022  |
| 3 | 1 | 2 | 1 | 10 | 3 | 3 | 1 | 3 | 1 | 16 | 2 | 10411.5471 | 0.0049  |
| 3 | 1 | 2 | 1 | 7  | 4 | 3 | 1 | 3 | 1 | 13 | 3 | 10411.5538 | 0.0050  |
| 3 | 1 | 2 | 1 | 5  | 4 | 3 | 1 | 3 | 1 | 11 | 3 | 10411.5949 | 0.0040  |
| 3 | 1 | 2 | 1 | 3  | 5 | 3 | 1 | 3 | 1 | 8  | 4 | 10411.5996 | 0.0037  |
| 3 | 1 | 2 | 1 | 12 | 3 | 3 | 1 | 3 | 1 | 18 | 2 | 10411.6172 | 0.0040  |
| 3 | 1 | 2 | 0 | 4  | 4 | 3 | 1 | 3 | 0 | 4  | 4 | 10417.5886 | 0.0010  |
| 3 | 1 | 2 | 0 | 4  | 5 | 3 | 1 | 3 | 0 | 4  | 5 | 10417.6377 | -0.0004 |
| 3 | 1 | 2 | 0 | 4  | 3 | 3 | 1 | 3 | 0 | 4  | 3 | 10417.6566 | 0.0036  |
| 3 | 1 | 2 | 0 | 3  | 3 | 3 | 1 | 3 | 0 | 3  | 3 | 10418.0746 | 0.0000  |
| 3 | 1 | 2 | 0 | 3  | 4 | 3 | 1 | 3 | 0 | 3  | 4 | 10418.1145 | 0.0010  |
| 3 | 1 | 2 | 0 | 3  | 2 | 3 | 1 | 3 | 0 | 3  | 2 | 10418.1320 | 0.0018  |
| 3 | 1 | 2 | 0 | 5  | 5 | 3 | 1 | 3 | 0 | 5  | 5 | 10418.6102 | 0.0026  |
| 3 | 1 | 2 | 0 | 5  | 6 | 3 | 1 | 3 | 0 | 5  | 6 | 10418.6807 | 0.0011  |
| 3 | 1 | 2 | 1 | 21 | 1 | 3 | 1 | 3 | 1 | 21 | 1 | 10419.0949 | -0.0001 |
| 3 | 1 | 2 | 1 | 19 | 2 | 3 | 1 | 3 | 1 | 19 | 2 | 10419.0949 | -0.0027 |
| 3 | 1 | 2 | 1 | 19 | 2 | 3 | 1 | 3 | 1 | 14 | 3 | 10419.1194 | 0.0023  |
| 3 | 1 | 2 | 1 | 21 | 1 | 3 | 1 | 3 | 1 | 17 | 2 | 10419.1194 | 0.0007  |
| 3 | 1 | 2 | 1 | 14 | 3 | 3 | 1 | 3 | 1 | 19 | 2 | 10419.1319 | 0.0017  |
| 3 | 1 | 2 | 1 | 14 | 3 | 3 | 1 | 3 | 1 | 14 | 3 | 10419.1483 | -0.0015 |
| 3 | 1 | 2 | 1 | 17 | 2 | 3 | 1 | 3 | 1 | 17 | 2 | 10419.1483 | -0.0003 |
| 3 | 1 | 2 | 0 | 3  | 4 | 3 | 1 | 3 | 0 | 4  | 5 | 10424.1549 | -0.0040 |
| 3 | 1 | 2 | 0 | 3  | 2 | 3 | 1 | 3 | 0 | 4  | 3 | 10424.1715 | -0.0033 |
| 3 | 1 | 2 | 1 | 0  | 6 | 3 | 1 | 3 | 1 | 3  | 5 | 10431.6153 | 0.0018  |
| 3 | 1 | 2 | 1 | 9  | 3 | 3 | 1 | 3 | 1 | 15 | 2 | 10431.6214 | -0.0001 |
| 3 | 1 | 2 | 1 | 21 | 1 | 3 | 1 | 3 | 1 | 16 | 2 | 10432.0415 | -0.0007 |
| 3 | 1 | 2 | 1 | 19 | 2 | 3 | 1 | 3 | 1 | 13 | 3 | 10432.0415 | -0.0022 |
| 3 | 1 | 2 | 1 | 19 | 2 | 3 | 1 | 3 | 1 | 18 | 2 | 10432.0669 | -0.0027 |
| 3 | 1 | 2 | 1 | 14 | 3 | 3 | 1 | 3 | 1 | 13 | 3 | 10432.0737 | -0.0026 |
| 3 | 1 | 2 | 1 | 17 | 2 | 3 | 1 | 3 | 1 | 11 | 3 | 10432.0876 | -0.0032 |
| 3 | 1 | 2 | 1 | 14 | 3 | 3 | 1 | 3 | 1 | 8  | 4 | 10432.0876 | -0.0052 |
| 3 | 1 | 2 | 1 | 23 | 0 | 3 | 1 | 3 | 1 | 20 | 1 | 10432.1082 | -0.0056 |

Table S8: Observed Transition Frequencies (in MHz) for (Z)-CHDC<sup>35</sup>ClF

|   |   |   |   |    |   |   |   |   |   |    |   |            |         |
|---|---|---|---|----|---|---|---|---|---|----|---|------------|---------|
| 3 | 1 | 2 | 1 | 22 | 1 | 3 | 1 | 3 | 1 | 18 | 2 | 10432.1157 | -0.0052 |
| 2 | 0 | 2 | 1 | 12 | 2 | 1 | 1 | 1 | 1 | 12 | 1 | 11746.2892 | 0.0009  |
| 2 | 0 | 2 | 1 | 5  | 3 | 1 | 1 | 1 | 1 | 5  | 2 | 11746.3059 | 0.0019  |
| 2 | 0 | 2 | 1 | 3  | 4 | 1 | 1 | 1 | 1 | 3  | 3 | 11746.3117 | 0.0020  |
| 2 | 0 | 2 | 1 | 10 | 2 | 1 | 1 | 1 | 1 | 10 | 1 | 11746.3327 | 0.0012  |
| 2 | 0 | 2 | 1 | 7  | 3 | 1 | 1 | 1 | 1 | 7  | 2 | 11746.3396 | 0.0016  |
| 2 | 0 | 2 | 0 | 3  | 3 | 1 | 1 | 1 | 0 | 3  | 3 | 11756.0253 | 0.0000  |
| 2 | 0 | 2 | 0 | 3  | 4 | 1 | 1 | 1 | 0 | 3  | 4 | 11756.0544 | 0.0001  |
| 2 | 0 | 2 | 0 | 3  | 2 | 1 | 1 | 1 | 0 | 3  | 2 | 11756.0688 | 0.0021  |
| 2 | 0 | 2 | 1 | 13 | 2 | 1 | 1 | 1 | 1 | 12 | 1 | 11758.7897 | -0.0026 |
| 2 | 0 | 2 | 1 | 18 | 1 | 1 | 1 | 1 | 1 | 12 | 1 | 11758.7897 | -0.0027 |
| 2 | 0 | 2 | 1 | 11 | 2 | 1 | 1 | 1 | 1 | 5  | 2 | 11758.8126 | 0.0031  |
| 2 | 0 | 2 | 1 | 8  | 3 | 1 | 1 | 1 | 1 | 3  | 3 | 11758.8126 | -0.0012 |
| 2 | 0 | 2 | 1 | 11 | 2 | 1 | 1 | 1 | 1 | 10 | 1 | 11758.8346 | -0.0024 |
| 2 | 0 | 2 | 1 | 16 | 1 | 1 | 1 | 1 | 1 | 10 | 1 | 11758.8346 | -0.0024 |
| 2 | 0 | 2 | 1 | 13 | 2 | 1 | 1 | 1 | 1 | 7  | 2 | 11758.8405 | -0.0015 |
| 2 | 0 | 2 | 0 | 2  | 2 | 1 | 1 | 1 | 0 | 3  | 3 | 11768.5268 | -0.0034 |
| 2 | 0 | 2 | 0 | 2  | 3 | 1 | 1 | 1 | 0 | 3  | 4 | 11768.5552 | -0.0042 |
| 2 | 0 | 2 | 0 | 2  | 1 | 1 | 1 | 1 | 0 | 3  | 2 | 11768.5702 | -0.0016 |
| 2 | 0 | 2 | 0 | 4  | 4 | 1 | 1 | 1 | 0 | 3  | 3 | 11773.5148 | 0.0082  |
| 2 | 0 | 2 | 0 | 4  | 5 | 1 | 1 | 1 | 0 | 3  | 4 | 11773.5421 | 0.0066  |
| 2 | 0 | 2 | 0 | 4  | 3 | 1 | 1 | 1 | 0 | 3  | 2 | 11773.5582 | 0.0103  |
| 2 | 0 | 2 | 1 | 19 | 1 | 1 | 1 | 1 | 1 | 12 | 1 | 11776.2576 | -0.0029 |
| 2 | 0 | 2 | 1 | 17 | 1 | 1 | 1 | 1 | 1 | 5  | 2 | 11776.2741 | -0.0015 |
| 2 | 0 | 2 | 1 | 14 | 2 | 1 | 1 | 1 | 1 | 3  | 3 | 11776.2794 | -0.0025 |
| 2 | 0 | 2 | 1 | 17 | 1 | 1 | 1 | 1 | 1 | 10 | 1 | 11776.3025 | -0.0006 |
| 2 | 0 | 2 | 1 | 11 | 2 | 1 | 1 | 1 | 1 | 11 | 1 | 11776.3329 | 0.0018  |
| 2 | 0 | 2 | 1 | 8  | 3 | 1 | 1 | 1 | 1 | 8  | 2 | 11776.3477 | 0.0023  |
| 2 | 0 | 2 | 1 | 17 | 1 | 1 | 1 | 1 | 1 | 16 | 0 | 11793.8042 | 0.0013  |
| 2 | 0 | 2 | 1 | 21 | 0 | 1 | 1 | 1 | 1 | 11 | 1 | 11793.8080 | 0.0004  |
| 2 | 0 | 2 | 1 | 14 | 2 | 1 | 1 | 1 | 1 | 13 | 1 | 11793.8139 | 0.0005  |
| 2 | 0 | 2 | 1 | 14 | 2 | 1 | 1 | 1 | 1 | 8  | 2 | 11793.8139 | 0.0004  |
| 2 | 0 | 2 | 1 | 19 | 1 | 1 | 1 | 1 | 1 | 8  | 2 | 11793.8139 | 0.0004  |
| 3 | 1 | 2 | 1 | 16 | 2 | 3 | 0 | 3 | 1 | 21 | 1 | 12350.4268 | -0.0003 |
| 3 | 1 | 2 | 1 | 13 | 3 | 3 | 0 | 3 | 1 | 19 | 2 | 12350.4375 | 0.0038  |
| 3 | 1 | 2 | 1 | 11 | 3 | 3 | 0 | 3 | 1 | 17 | 2 | 12350.4699 | 0.0027  |
| 3 | 1 | 2 | 1 | 8  | 4 | 3 | 0 | 3 | 1 | 14 | 3 | 12350.4699 | 0.0014  |
| 3 | 1 | 2 | 0 | 4  | 4 | 3 | 0 | 3 | 0 | 5  | 5 | 12351.6561 | -0.0090 |
| 3 | 1 | 2 | 0 | 4  | 5 | 3 | 0 | 3 | 0 | 5  | 6 | 12351.7010 | -0.0069 |
| 3 | 1 | 2 | 0 | 4  | 3 | 3 | 0 | 3 | 0 | 5  | 4 | 12351.7171 | -0.0024 |
| 3 | 1 | 2 | 1 | 7  | 4 | 3 | 0 | 3 | 1 | 13 | 3 | 12360.4947 | 0.0045  |
| 3 | 1 | 2 | 1 | 7  | 4 | 3 | 0 | 3 | 1 | 8  | 4 | 12360.5036 | 0.0059  |
| 3 | 1 | 2 | 1 | 5  | 4 | 3 | 0 | 3 | 1 | 11 | 3 | 12360.5274 | 0.0045  |
| 3 | 1 | 2 | 1 | 3  | 5 | 3 | 0 | 3 | 1 | 8  | 4 | 12360.5322 | 0.0040  |

Table S8: Observed Transition Frequencies (in MHz) for (Z)-CHDC<sup>35</sup>ClF

|   |   |   |   |    |   |   |   |   |   |    |   |            |         |
|---|---|---|---|----|---|---|---|---|---|----|---|------------|---------|
| 3 | 1 | 2 | 1 | 12 | 3 | 3 | 0 | 3 | 1 | 18 | 2 | 12360.5419 | 0.0044  |
| 3 | 1 | 2 | 1 | 21 | 1 | 3 | 0 | 3 | 1 | 21 | 1 | 12364.3987 | -0.0006 |
| 3 | 1 | 2 | 1 | 19 | 2 | 3 | 0 | 3 | 1 | 19 | 2 | 12364.4055 | 0.0015  |
| 3 | 1 | 2 | 1 | 19 | 2 | 3 | 0 | 3 | 1 | 14 | 3 | 12364.4147 | 0.0018  |
| 3 | 1 | 2 | 1 | 21 | 1 | 3 | 0 | 3 | 1 | 17 | 2 | 12364.4147 | 0.0004  |
| 3 | 1 | 2 | 1 | 14 | 3 | 3 | 0 | 3 | 1 | 19 | 2 | 12364.4340 | -0.0026 |
| 3 | 1 | 2 | 1 | 17 | 2 | 3 | 0 | 3 | 1 | 17 | 2 | 12364.4443 | 0.0001  |
| 3 | 1 | 2 | 1 | 14 | 3 | 3 | 0 | 3 | 1 | 14 | 3 | 12364.4443 | -0.0012 |
| 3 | 1 | 2 | 1 | 4  | 4 | 3 | 0 | 3 | 1 | 4  | 4 | 12365.6190 | -0.0001 |
| 3 | 1 | 2 | 1 | 2  | 5 | 3 | 0 | 3 | 1 | 2  | 5 | 12365.6265 | -0.0004 |
| 3 | 1 | 2 | 1 | 0  | 6 | 3 | 0 | 3 | 1 | 0  | 6 | 12365.6788 | -0.0038 |
| 3 | 1 | 2 | 1 | 6  | 4 | 3 | 0 | 3 | 1 | 6  | 4 | 12365.6934 | -0.0035 |
| 3 | 1 | 2 | 1 | 16 | 2 | 3 | 0 | 3 | 1 | 16 | 2 | 12367.0155 | 0.0002  |
| 3 | 1 | 2 | 1 | 13 | 3 | 3 | 0 | 3 | 1 | 13 | 3 | 12367.0155 | 0.0008  |
| 3 | 1 | 2 | 1 | 13 | 3 | 3 | 0 | 3 | 1 | 8  | 4 | 12367.0269 | 0.0047  |
| 3 | 1 | 2 | 1 | 13 | 3 | 3 | 0 | 3 | 1 | 18 | 2 | 12367.0269 | 0.0033  |
| 3 | 1 | 2 | 1 | 13 | 3 | 3 | 0 | 3 | 1 | 16 | 2 | 12367.0338 | 0.0028  |
| 3 | 1 | 2 | 1 | 11 | 3 | 3 | 0 | 3 | 1 | 8  | 4 | 12367.0338 | 0.0022  |
| 3 | 1 | 2 | 1 | 11 | 3 | 3 | 0 | 3 | 1 | 11 | 3 | 12367.0463 | 0.0004  |
| 3 | 1 | 2 | 1 | 8  | 4 | 3 | 0 | 3 | 1 | 8  | 4 | 12367.0463 | -0.0019 |
| 3 | 1 | 2 | 1 | 20 | 1 | 3 | 0 | 3 | 1 | 20 | 1 | 12367.0576 | 0.0027  |
| 3 | 1 | 2 | 1 | 18 | 2 | 3 | 0 | 3 | 1 | 18 | 2 | 12367.0576 | -0.0005 |
| 3 | 1 | 2 | 1 | 10 | 3 | 3 | 0 | 3 | 1 | 10 | 3 | 12368.2181 | -0.0053 |
| 3 | 1 | 2 | 1 | 7  | 4 | 3 | 0 | 3 | 1 | 7  | 4 | 12368.2255 | -0.0002 |
| 3 | 1 | 2 | 1 | 5  | 4 | 3 | 0 | 3 | 1 | 5  | 4 | 12368.2618 | 0.0004  |
| 3 | 1 | 2 | 1 | 15 | 2 | 3 | 0 | 3 | 1 | 15 | 2 | 12368.2735 | 0.0025  |
| 3 | 1 | 2 | 1 | 12 | 3 | 3 | 0 | 3 | 1 | 12 | 3 | 12368.2735 | -0.0016 |
| 3 | 1 | 2 | 1 | 3  | 5 | 3 | 0 | 3 | 1 | 5  | 4 | 12368.2821 | 0.0012  |
| 3 | 1 | 2 | 1 | 13 | 3 | 3 | 0 | 3 | 1 | 7  | 4 | 12374.7460 | -0.0042 |
| 3 | 1 | 2 | 1 | 16 | 2 | 3 | 0 | 3 | 1 | 10 | 3 | 12374.7460 | -0.0052 |
| 3 | 1 | 2 | 1 | 13 | 3 | 3 | 0 | 3 | 1 | 5  | 4 | 12374.7794 | 0.0045  |
| 3 | 1 | 2 | 1 | 8  | 4 | 3 | 0 | 3 | 1 | 3  | 5 | 12374.7794 | -0.0064 |
| 3 | 1 | 2 | 1 | 20 | 1 | 3 | 0 | 3 | 1 | 15 | 2 | 12374.7913 | -0.0015 |
| 3 | 1 | 2 | 1 | 18 | 2 | 3 | 0 | 3 | 1 | 12 | 3 | 12374.7913 | -0.0043 |
| 3 | 1 | 2 | 1 | 19 | 2 | 3 | 0 | 3 | 1 | 13 | 3 | 12380.9835 | -0.0015 |
| 3 | 1 | 2 | 1 | 21 | 1 | 3 | 0 | 3 | 1 | 16 | 2 | 12380.9835 | -0.0039 |
| 3 | 1 | 2 | 1 | 17 | 2 | 3 | 0 | 3 | 1 | 11 | 3 | 12381.0212 | -0.0016 |
| 3 | 1 | 2 | 1 | 14 | 3 | 3 | 0 | 3 | 1 | 8  | 4 | 12381.0212 | -0.0039 |
| 3 | 1 | 2 | 1 | 4  | 4 | 3 | 0 | 3 | 1 | 10 | 3 | 12382.1837 | 0.0017  |
| 3 | 1 | 2 | 1 | 2  | 5 | 3 | 0 | 3 | 1 | 7  | 4 | 12382.1942 | 0.0068  |
| 3 | 1 | 2 | 1 | 0  | 6 | 3 | 0 | 3 | 1 | 3  | 5 | 12382.2402 | 0.0015  |
| 3 | 1 | 2 | 1 | 6  | 4 | 3 | 0 | 3 | 1 | 12 | 3 | 12382.2465 | -0.0024 |
| 1 | 1 | 1 | 1 | 8  | 2 | 0 | 0 | 0 | 1 | 0  | 3 | 13029.3107 | -0.0021 |
| 1 | 1 | 1 | 1 | 11 | 1 | 0 | 0 | 0 | 1 | 1  | 2 | 13029.3151 | -0.0036 |

Table S8: Observed Transition Frequencies (in MHz) for (Z)-CHDC<sup>35</sup>ClF

|   |   |   |   |    |   |   |   |   |   |    |   |            |         |
|---|---|---|---|----|---|---|---|---|---|----|---|------------|---------|
| 1 | 1 | 1 | 1 | 9  | 1 | 0 | 0 | 0 | 1 | 9  | 0 | 13037.0783 | 0.0012  |
| 1 | 1 | 1 | 1 | 6  | 2 | 0 | 0 | 0 | 1 | 6  | 1 | 13037.0874 | 0.0007  |
| 1 | 1 | 1 | 1 | 1  | 3 | 0 | 0 | 0 | 1 | 1  | 2 | 13037.0940 | 0.0041  |
| 1 | 1 | 1 | 1 | 0  | 4 | 0 | 0 | 0 | 1 | 0  | 3 | 13037.1032 | 0.0031  |
| 1 | 1 | 1 | 1 | 4  | 2 | 0 | 0 | 0 | 1 | 4  | 1 | 13037.1205 | 0.0009  |
| 1 | 1 | 1 | 1 | 2  | 3 | 0 | 0 | 0 | 1 | 2  | 2 | 13037.1301 | 0.0013  |
| 1 | 1 | 1 | 0 | 2  | 2 | 0 | 0 | 0 | 0 | 2  | 2 | 13046.8167 | 0.0017  |
| 1 | 1 | 1 | 0 | 2  | 3 | 0 | 0 | 0 | 0 | 2  | 3 | 13046.8446 | 0.0020  |
| 1 | 1 | 1 | 0 | 2  | 1 | 0 | 0 | 0 | 0 | 2  | 1 | 13046.8670 | 0.0022  |
| 1 | 1 | 1 | 0 | 2  | 1 | 0 | 0 | 0 | 0 | 2  | 2 | 13046.8670 | 0.0022  |
| 3 | 2 | 1 | 1 | 8  | 4 | 3 | 1 | 2 | 1 | 14 | 3 | 13475.6867 | 0.0028  |
| 3 | 2 | 1 | 1 | 16 | 2 | 3 | 1 | 2 | 1 | 21 | 1 | 13475.6968 | 0.0049  |
| 3 | 2 | 1 | 1 | 20 | 1 | 3 | 1 | 2 | 1 | 21 | 1 | 13475.7109 | 0.0004  |
| 3 | 2 | 1 | 1 | 18 | 2 | 3 | 1 | 2 | 1 | 19 | 2 | 13475.7217 | 0.0002  |
| 3 | 2 | 1 | 0 | 2  | 2 | 3 | 1 | 2 | 0 | 2  | 3 | 13477.4253 | 0.0003  |
| 3 | 2 | 1 | 0 | 2  | 1 | 3 | 1 | 2 | 0 | 2  | 1 | 13477.4347 | 0.0010  |
| 3 | 2 | 1 | 0 | 2  | 3 | 3 | 1 | 2 | 0 | 2  | 3 | 13477.4444 | 0.0027  |
| 3 | 2 | 1 | 0 | 2  | 1 | 3 | 1 | 2 | 0 | 2  | 2 | 13477.4858 | 0.0041  |
| 3 | 2 | 1 | 1 | 9  | 3 | 3 | 1 | 2 | 1 | 9  | 3 | 13483.1306 | -0.0015 |
| 3 | 2 | 1 | 1 | 1  | 5 | 3 | 1 | 2 | 1 | 1  | 5 | 13483.1306 | -0.0017 |
| 3 | 2 | 1 | 1 | 6  | 4 | 3 | 1 | 2 | 1 | 6  | 4 | 13483.1368 | -0.0010 |
| 3 | 2 | 1 | 1 | 0  | 6 | 3 | 1 | 2 | 1 | 0  | 6 | 13483.1397 | -0.0014 |
| 3 | 2 | 1 | 1 | 4  | 4 | 3 | 1 | 2 | 1 | 4  | 4 | 13483.1500 | -0.0006 |
| 3 | 2 | 1 | 0 | 4  | 3 | 3 | 1 | 2 | 0 | 3  | 2 | 13488.8501 | 0.0008  |
| 3 | 2 | 1 | 0 | 4  | 4 | 3 | 1 | 2 | 0 | 3  | 3 | 13488.8610 | 0.0035  |
| 3 | 2 | 1 | 1 | 11 | 3 | 3 | 1 | 2 | 1 | 11 | 3 | 13489.6510 | 0.0004  |
| 3 | 2 | 1 | 1 | 8  | 4 | 3 | 1 | 2 | 1 | 8  | 4 | 13489.6614 | 0.0005  |
| 3 | 2 | 1 | 1 | 16 | 2 | 3 | 1 | 2 | 1 | 16 | 2 | 13489.6654 | 0.0014  |
| 3 | 2 | 1 | 1 | 13 | 3 | 3 | 1 | 2 | 1 | 13 | 3 | 13489.6754 | 0.0011  |
| 3 | 2 | 1 | 1 | 17 | 2 | 3 | 1 | 2 | 1 | 11 | 3 | 13491.4034 | -0.0027 |
| 3 | 2 | 1 | 1 | 14 | 3 | 3 | 1 | 2 | 1 | 8  | 4 | 13491.4192 | -0.0015 |
| 3 | 2 | 1 | 1 | 19 | 2 | 3 | 1 | 2 | 1 | 13 | 3 | 13491.4326 | -0.0005 |
| 3 | 2 | 1 | 1 | 15 | 2 | 3 | 1 | 2 | 1 | 15 | 2 | 13495.3674 | -0.0006 |
| 3 | 2 | 1 | 1 | 5  | 4 | 3 | 1 | 2 | 1 | 5  | 4 | 13495.3674 | -0.0006 |
| 3 | 2 | 1 | 1 | 12 | 3 | 3 | 1 | 2 | 1 | 12 | 3 | 13495.3763 | 0.0030  |
| 3 | 2 | 1 | 1 | 3  | 5 | 3 | 1 | 2 | 1 | 3  | 5 | 13495.3763 | -0.0003 |
| 3 | 2 | 1 | 1 | 10 | 3 | 3 | 1 | 2 | 1 | 10 | 3 | 13495.3836 | 0.0017  |
| 3 | 2 | 1 | 1 | 7  | 4 | 3 | 1 | 2 | 1 | 7  | 4 | 13495.3930 | 0.0026  |
| 3 | 2 | 1 | 1 | 11 | 3 | 3 | 1 | 2 | 1 | 5  | 4 | 13496.1691 | -0.0044 |
| 3 | 2 | 1 | 1 | 18 | 2 | 3 | 1 | 2 | 1 | 12 | 3 | 13496.1731 | -0.0048 |
| 3 | 2 | 1 | 1 | 8  | 4 | 3 | 1 | 2 | 1 | 3  | 5 | 13496.1764 | -0.0044 |
| 3 | 2 | 1 | 1 | 16 | 2 | 3 | 1 | 2 | 1 | 10 | 3 | 13496.1896 | -0.0023 |
| 3 | 2 | 1 | 1 | 13 | 3 | 3 | 1 | 2 | 1 | 7  | 4 | 13496.1964 | -0.0024 |
| 3 | 2 | 1 | 1 | 4  | 4 | 3 | 1 | 2 | 1 | 10 | 3 | 13497.1110 | 0.0018  |

Table S8: Observed Transition Frequencies (in MHz) for (Z)-CHDC<sup>35</sup>ClF

|   |   |   |   |    |   |   |   |   |   |    |   |            |         |
|---|---|---|---|----|---|---|---|---|---|----|---|------------|---------|
| 3 | 2 | 1 | 1 | 0  | 6 | 3 | 1 | 2 | 1 | 3  | 5 | 13497.1167 | 0.0027  |
| 3 | 2 | 1 | 1 | 2  | 5 | 3 | 1 | 2 | 1 | 7  | 4 | 13497.1210 | -0.0002 |
| 3 | 1 | 2 | 0 | 4  | 4 | 2 | 2 | 1 | 0 | 3  | 3 | 13614.8985 | 0.0028  |
| 3 | 1 | 2 | 0 | 4  | 5 | 2 | 2 | 1 | 0 | 3  | 4 | 13614.9304 | 0.0022  |
| 3 | 1 | 2 | 0 | 4  | 3 | 2 | 2 | 1 | 0 | 3  | 2 | 13614.9409 | 0.0026  |
| 3 | 1 | 2 | 1 | 16 | 2 | 2 | 2 | 1 | 1 | 10 | 2 | 13621.4221 | -0.0026 |
| 3 | 1 | 2 | 1 | 8  | 4 | 2 | 2 | 1 | 1 | 3  | 4 | 13621.4445 | -0.0043 |
| 3 | 1 | 2 | 1 | 11 | 3 | 2 | 2 | 1 | 1 | 5  | 3 | 13621.4489 | -0.0042 |
| 3 | 1 | 2 | 1 | 18 | 2 | 2 | 2 | 1 | 1 | 12 | 2 | 13621.4586 | 0.0001  |
| 3 | 1 | 2 | 1 | 20 | 1 | 2 | 2 | 1 | 1 | 15 | 1 | 13621.4586 | -0.0018 |
| 3 | 1 | 2 | 1 | 7  | 4 | 2 | 2 | 1 | 1 | 2  | 4 | 13633.2089 | -0.0017 |
| 3 | 1 | 2 | 1 | 10 | 3 | 2 | 2 | 1 | 1 | 4  | 3 | 13633.2164 | -0.0014 |
| 3 | 1 | 2 | 1 | 3  | 5 | 2 | 2 | 1 | 1 | 0  | 5 | 13633.2498 | -0.0015 |
| 3 | 1 | 2 | 1 | 5  | 4 | 2 | 2 | 1 | 1 | 1  | 4 | 13633.2556 | -0.0015 |
| 3 | 1 | 2 | 1 | 12 | 3 | 2 | 2 | 1 | 1 | 6  | 3 | 13633.2556 | -0.0058 |
| 3 | 1 | 2 | 1 | 15 | 2 | 2 | 2 | 1 | 1 | 9  | 2 | 13633.2673 | 0.0004  |
| 3 | 1 | 2 | 1 | 13 | 3 | 2 | 2 | 1 | 1 | 13 | 2 | 13634.5299 | 0.0023  |
| 3 | 1 | 2 | 1 | 16 | 2 | 2 | 2 | 1 | 1 | 16 | 1 | 13634.5299 | 0.0002  |
| 3 | 1 | 2 | 1 | 20 | 1 | 2 | 2 | 1 | 1 | 18 | 1 | 13634.5430 | 0.0008  |
| 3 | 1 | 2 | 1 | 8  | 4 | 2 | 2 | 1 | 1 | 8  | 3 | 13634.5525 | -0.0010 |
| 3 | 1 | 2 | 1 | 11 | 3 | 2 | 2 | 1 | 1 | 11 | 2 | 13634.5525 | -0.0022 |
| 3 | 1 | 2 | 1 | 18 | 2 | 2 | 2 | 1 | 1 | 18 | 1 | 13634.5621 | 0.0002  |
| 3 | 1 | 2 | 0 | 5  | 5 | 2 | 2 | 1 | 0 | 4  | 4 | 13647.1827 | 0.0091  |
| 3 | 1 | 2 | 0 | 5  | 6 | 2 | 2 | 1 | 0 | 4  | 5 | 13647.2328 | 0.0080  |
| 3 | 1 | 2 | 0 | 5  | 4 | 2 | 2 | 1 | 0 | 4  | 3 | 13647.2468 | 0.0096  |
| 3 | 1 | 2 | 1 | 19 | 2 | 2 | 2 | 1 | 1 | 13 | 2 | 13648.4970 | -0.0010 |
| 3 | 1 | 2 | 1 | 14 | 3 | 2 | 2 | 1 | 1 | 8  | 3 | 13648.5273 | -0.0031 |
| 3 | 1 | 2 | 1 | 17 | 2 | 2 | 2 | 1 | 1 | 11 | 2 | 13648.5273 | -0.0044 |
| 3 | 1 | 2 | 1 | 22 | 1 | 2 | 2 | 1 | 1 | 18 | 1 | 13648.5459 | -0.0031 |
| 3 | 1 | 2 | 1 | 22 | 1 | 2 | 2 | 1 | 1 | 13 | 2 | 13648.5459 | -0.0034 |
| 3 | 1 | 2 | 1 | 21 | 1 | 2 | 2 | 1 | 1 | 21 | 0 | 13666.7668 | 0.0009  |
| 3 | 1 | 2 | 1 | 19 | 2 | 2 | 2 | 1 | 1 | 14 | 2 | 13666.7797 | -0.0002 |
| 3 | 1 | 2 | 1 | 19 | 2 | 2 | 2 | 1 | 1 | 19 | 1 | 13666.7797 | -0.0002 |
| 3 | 1 | 2 | 1 | 21 | 1 | 2 | 2 | 1 | 1 | 17 | 1 | 13666.7909 | 0.0026  |
| 3 | 1 | 2 | 1 | 14 | 3 | 2 | 2 | 1 | 1 | 14 | 2 | 13666.8104 | -0.0021 |
| 3 | 1 | 2 | 1 | 17 | 2 | 2 | 2 | 1 | 1 | 17 | 1 | 13666.8181 | -0.0001 |
| 3 | 1 | 2 | 1 | 22 | 1 | 2 | 2 | 1 | 1 | 19 | 1 | 13666.8298 | -0.0013 |
| 4 | 2 | 2 | 0 | 4  | 3 | 4 | 1 | 3 | 0 | 3  | 2 | 13861.1719 | 0.0042  |
| 4 | 2 | 2 | 0 | 4  | 4 | 4 | 1 | 3 | 0 | 3  | 3 | 13861.1761 | 0.0053  |
| 4 | 2 | 2 | 0 | 4  | 5 | 4 | 1 | 3 | 0 | 3  | 4 | 13861.1761 | 0.0046  |
| 4 | 2 | 2 | 1 | 21 | 2 | 4 | 1 | 3 | 1 | 21 | 2 | 13870.6223 | -0.0010 |
| 4 | 2 | 2 | 1 | 19 | 3 | 4 | 1 | 3 | 1 | 19 | 3 | 13870.6269 | 0.0001  |
| 4 | 2 | 2 | 1 | 17 | 3 | 4 | 1 | 3 | 1 | 17 | 3 | 13870.6269 | -0.0018 |
| 4 | 2 | 2 | 1 | 14 | 4 | 4 | 1 | 3 | 1 | 14 | 4 | 13870.6315 | -0.0009 |

Table S8: Observed Transition Frequencies (in MHz) for (Z)-CHDC<sup>35</sup>ClF

|   |   |   |   |    |   |   |   |   |   |    |   |            |         |
|---|---|---|---|----|---|---|---|---|---|----|---|------------|---------|
| 4 | 2 | 2 | 1 | 4  | 5 | 4 | 1 | 3 | 1 | 4  | 5 | 13872.6295 | -0.0023 |
| 4 | 2 | 2 | 1 | 2  | 6 | 4 | 1 | 3 | 1 | 2  | 6 | 13872.6356 | -0.0008 |
| 4 | 2 | 2 | 1 | 1  | 6 | 4 | 1 | 3 | 1 | 1  | 6 | 13872.6356 | -0.0019 |
| 4 | 2 | 2 | 1 | 9  | 4 | 4 | 1 | 3 | 1 | 9  | 4 | 13872.6356 | -0.0025 |
| 4 | 2 | 2 | 1 | 0  | 7 | 4 | 1 | 3 | 1 | 0  | 7 | 13872.6405 | -0.0017 |
| 4 | 2 | 2 | 1 | 6  | 5 | 4 | 1 | 3 | 1 | 6  | 5 | 13872.6405 | -0.0026 |
| 4 | 2 | 2 | 1 | 10 | 4 | 4 | 1 | 3 | 1 | 16 | 3 | 13873.0526 | 0.0038  |
| 4 | 2 | 2 | 1 | 7  | 5 | 4 | 1 | 3 | 1 | 13 | 4 | 13873.0596 | 0.0045  |
| 4 | 2 | 2 | 1 | 5  | 5 | 4 | 1 | 3 | 1 | 11 | 4 | 13873.0596 | 0.0042  |
| 4 | 2 | 2 | 1 | 15 | 3 | 4 | 1 | 3 | 1 | 20 | 2 | 13873.0596 | 0.0035  |
| 4 | 2 | 2 | 1 | 3  | 6 | 4 | 1 | 3 | 1 | 8  | 5 | 13873.0664 | 0.0048  |
| 4 | 2 | 2 | 1 | 12 | 4 | 4 | 1 | 3 | 1 | 18 | 3 | 13873.0664 | 0.0049  |
| 4 | 2 | 2 | 1 | 16 | 3 | 4 | 1 | 3 | 1 | 16 | 3 | 13876.3616 | -0.0014 |
| 4 | 2 | 2 | 1 | 13 | 4 | 4 | 1 | 3 | 1 | 13 | 4 | 13876.3657 | -0.0007 |
| 4 | 2 | 2 | 1 | 11 | 4 | 4 | 1 | 3 | 1 | 11 | 4 | 13876.3657 | -0.0022 |
| 4 | 2 | 2 | 1 | 20 | 2 | 4 | 1 | 3 | 1 | 20 | 2 | 13876.3657 | -0.0022 |
| 4 | 2 | 2 | 1 | 8  | 5 | 4 | 1 | 3 | 1 | 8  | 5 | 13876.3705 | -0.0010 |
| 4 | 2 | 2 | 1 | 18 | 3 | 4 | 1 | 3 | 1 | 18 | 3 | 13876.3705 | -0.0020 |
| 4 | 2 | 2 | 1 | 10 | 4 | 4 | 1 | 3 | 1 | 10 | 4 | 13878.3818 | -0.0018 |
| 4 | 2 | 2 | 1 | 7  | 5 | 4 | 1 | 3 | 1 | 7  | 5 | 13878.3863 | -0.0013 |
| 4 | 2 | 2 | 1 | 5  | 5 | 4 | 1 | 3 | 1 | 5  | 5 | 13878.3863 | -0.0024 |
| 4 | 2 | 2 | 1 | 15 | 3 | 4 | 1 | 3 | 1 | 15 | 3 | 13878.3863 | -0.0026 |
| 4 | 2 | 2 | 1 | 3  | 6 | 4 | 1 | 3 | 1 | 3  | 6 | 13878.3913 | -0.0014 |
| 4 | 2 | 2 | 1 | 12 | 4 | 4 | 1 | 3 | 1 | 12 | 4 | 13878.3913 | -0.0023 |
| 4 | 2 | 2 | 1 | 21 | 2 | 4 | 1 | 3 | 1 | 16 | 3 | 13885.8107 | -0.0065 |
| 4 | 2 | 2 | 1 | 19 | 3 | 4 | 1 | 3 | 1 | 13 | 4 | 13885.8208 | 0.0003  |
| 4 | 2 | 2 | 1 | 17 | 3 | 4 | 1 | 3 | 1 | 11 | 4 | 13885.8253 | -0.0010 |
| 4 | 2 | 2 | 1 | 14 | 4 | 4 | 1 | 3 | 1 | 8  | 5 | 13885.8324 | 0.0020  |
| 4 | 2 | 2 | 1 | 2  | 6 | 4 | 1 | 3 | 1 | 7  | 5 | 13887.8282 | -0.0023 |
| 4 | 2 | 2 | 1 | 1  | 6 | 4 | 1 | 3 | 1 | 5  | 5 | 13887.8361 | 0.0024  |
| 4 | 2 | 2 | 1 | 9  | 4 | 4 | 1 | 3 | 1 | 15 | 3 | 13887.8361 | 0.0004  |
| 4 | 2 | 2 | 1 | 0  | 7 | 4 | 1 | 3 | 1 | 3  | 6 | 13887.8424 | 0.0012  |
| 4 | 2 | 2 | 1 | 6  | 5 | 4 | 1 | 3 | 1 | 12 | 4 | 13887.8424 | 0.0002  |
| 2 | 2 | 0 | 1 | 17 | 1 | 2 | 1 | 1 | 1 | 21 | 0 | 14284.1608 | 0.0032  |
| 2 | 2 | 0 | 1 | 14 | 2 | 2 | 1 | 1 | 1 | 14 | 2 | 14284.1809 | 0.0005  |
| 2 | 2 | 0 | 1 | 14 | 2 | 2 | 1 | 1 | 1 | 19 | 1 | 14284.1809 | 0.0005  |
| 2 | 2 | 0 | 1 | 19 | 1 | 2 | 1 | 1 | 1 | 14 | 2 | 14284.1809 | 0.0005  |
| 2 | 2 | 0 | 1 | 21 | 0 | 2 | 1 | 1 | 1 | 17 | 1 | 14284.1948 | -0.0013 |
| 2 | 2 | 0 | 1 | 17 | 1 | 2 | 1 | 1 | 1 | 11 | 2 | 14293.9137 | -0.0012 |
| 2 | 2 | 0 | 1 | 14 | 2 | 2 | 1 | 1 | 1 | 8  | 3 | 14293.9244 | -0.0006 |
| 2 | 2 | 0 | 1 | 11 | 2 | 2 | 1 | 1 | 1 | 17 | 1 | 14301.6498 | 0.0021  |
| 2 | 2 | 0 | 1 | 8  | 3 | 2 | 1 | 1 | 1 | 14 | 2 | 14301.6528 | 0.0026  |
| 2 | 2 | 0 | 1 | 9  | 2 | 2 | 1 | 1 | 1 | 9  | 2 | 14303.6021 | -0.0019 |
| 2 | 2 | 0 | 1 | 6  | 3 | 2 | 1 | 1 | 1 | 6  | 3 | 14303.6135 | 0.0009  |

Table S8: Observed Transition Frequencies (in MHz) for (Z)-CHDC<sup>35</sup>ClF

|   |   |   |   |    |   |   |   |   |   |    |   |            |         |
|---|---|---|---|----|---|---|---|---|---|----|---|------------|---------|
| 2 | 2 | 0 | 1 | 1  | 4 | 2 | 1 | 1 | 1 | 1  | 4 | 14303.6135 | -0.0010 |
| 2 | 2 | 0 | 1 | 0  | 5 | 2 | 1 | 1 | 1 | 0  | 5 | 14303.6213 | -0.0022 |
| 2 | 2 | 0 | 1 | 4  | 3 | 2 | 1 | 1 | 1 | 4  | 3 | 14303.6516 | -0.0014 |
| 2 | 2 | 0 | 1 | 2  | 4 | 2 | 1 | 1 | 1 | 2  | 4 | 14303.6605 | -0.0019 |
| 2 | 2 | 0 | 1 | 11 | 2 | 2 | 1 | 1 | 1 | 11 | 2 | 14311.3896 | 0.0004  |
| 2 | 2 | 0 | 1 | 8  | 3 | 2 | 1 | 1 | 1 | 8  | 3 | 14311.3966 | 0.0018  |
| 2 | 2 | 0 | 1 | 9  | 2 | 2 | 1 | 1 | 1 | 15 | 1 | 14313.3434 | 0.0040  |
| 2 | 2 | 0 | 1 | 1  | 4 | 2 | 1 | 1 | 1 | 5  | 3 | 14313.3476 | 0.0052  |
| 2 | 2 | 0 | 1 | 6  | 3 | 2 | 1 | 1 | 1 | 12 | 2 | 14313.3541 | 0.0029  |
| 2 | 2 | 0 | 1 | 0  | 5 | 2 | 1 | 1 | 1 | 3  | 4 | 14313.3603 | 0.0035  |
| 2 | 2 | 0 | 1 | 4  | 3 | 2 | 1 | 1 | 1 | 10 | 2 | 14313.3669 | 0.0071  |
| 2 | 2 | 0 | 1 | 2  | 4 | 2 | 1 | 1 | 1 | 7  | 3 | 14313.3729 | -0.0019 |
| 2 | 2 | 0 | 1 | 20 | 0 | 2 | 1 | 1 | 1 | 15 | 1 | 14318.3310 | -0.0027 |
| 2 | 2 | 0 | 1 | 11 | 2 | 2 | 1 | 1 | 1 | 5  | 3 | 14318.3354 | -0.0014 |
| 2 | 2 | 0 | 1 | 18 | 1 | 2 | 1 | 1 | 1 | 12 | 2 | 14318.3354 | -0.0023 |
| 2 | 2 | 0 | 1 | 8  | 3 | 2 | 1 | 1 | 1 | 3  | 4 | 14318.3424 | -0.0010 |
| 2 | 2 | 0 | 1 | 16 | 1 | 2 | 1 | 1 | 1 | 10 | 2 | 14318.3526 | -0.0017 |
| 2 | 2 | 0 | 1 | 13 | 2 | 2 | 1 | 1 | 1 | 7  | 3 | 14318.3605 | -0.0010 |
| 2 | 2 | 0 | 1 | 12 | 2 | 2 | 1 | 1 | 1 | 6  | 3 | 14321.0998 | 0.0015  |
| 2 | 2 | 0 | 1 | 5  | 3 | 2 | 1 | 1 | 1 | 1  | 4 | 14321.1051 | 0.0003  |
| 2 | 2 | 0 | 1 | 3  | 4 | 2 | 1 | 1 | 1 | 0  | 5 | 14321.1051 | -0.0041 |
| 2 | 2 | 0 | 1 | 10 | 2 | 2 | 1 | 1 | 1 | 4  | 3 | 14321.1385 | -0.0049 |
| 2 | 2 | 0 | 1 | 7  | 3 | 2 | 1 | 1 | 1 | 2  | 4 | 14321.1438 | -0.0045 |
| 2 | 2 | 0 | 1 | 10 | 2 | 2 | 1 | 1 | 1 | 16 | 1 | 14323.8891 | 0.0041  |
| 2 | 2 | 0 | 1 | 5  | 3 | 2 | 1 | 1 | 1 | 11 | 2 | 14323.8891 | 0.0040  |
| 2 | 2 | 0 | 1 | 7  | 3 | 2 | 1 | 1 | 1 | 13 | 2 | 14323.8983 | 0.0044  |
| 2 | 2 | 0 | 1 | 3  | 4 | 2 | 1 | 1 | 1 | 8  | 3 | 14323.8983 | 0.0043  |
| 2 | 2 | 0 | 1 | 5  | 3 | 2 | 1 | 1 | 1 | 5  | 3 | 14330.8296 | -0.0032 |
| 2 | 2 | 0 | 1 | 12 | 2 | 2 | 1 | 1 | 1 | 12 | 2 | 14330.8350 | -0.0019 |
| 2 | 2 | 0 | 1 | 3  | 4 | 2 | 1 | 1 | 1 | 3  | 4 | 14330.8442 | 0.0016  |
| 2 | 2 | 0 | 1 | 7  | 3 | 2 | 1 | 1 | 1 | 7  | 3 | 14330.8630 | 0.0024  |
| 2 | 1 | 2 | 1 | 15 | 1 | 1 | 1 | 1 | 1 | 15 | 0 | 15048.3816 | 0.0008  |
| 2 | 1 | 2 | 1 | 12 | 2 | 1 | 1 | 1 | 1 | 12 | 1 | 15048.3911 | 0.0050  |
| 2 | 1 | 2 | 1 | 5  | 3 | 1 | 1 | 1 | 1 | 5  | 2 | 15048.4088 | 0.0014  |
| 2 | 1 | 2 | 1 | 3  | 4 | 1 | 1 | 1 | 1 | 3  | 3 | 15048.4159 | 0.0017  |
| 2 | 1 | 2 | 1 | 7  | 3 | 1 | 1 | 1 | 1 | 3  | 3 | 15048.4286 | 0.0039  |
| 2 | 1 | 2 | 1 | 10 | 2 | 1 | 1 | 1 | 1 | 10 | 1 | 15048.4494 | 0.0021  |
| 2 | 1 | 2 | 1 | 7  | 3 | 1 | 1 | 1 | 1 | 7  | 2 | 15048.4548 | 0.0020  |
| 2 | 1 | 2 | 1 | 18 | 1 | 1 | 1 | 1 | 1 | 12 | 1 | 15054.5276 | -0.0010 |
| 2 | 1 | 2 | 1 | 13 | 2 | 1 | 1 | 1 | 1 | 12 | 1 | 15054.5276 | -0.0012 |
| 2 | 1 | 2 | 1 | 11 | 2 | 1 | 1 | 1 | 1 | 5  | 2 | 15054.5436 | -0.0012 |
| 2 | 1 | 2 | 1 | 8  | 3 | 1 | 1 | 1 | 1 | 3  | 3 | 15054.5490 | -0.0011 |
| 2 | 1 | 2 | 1 | 11 | 2 | 1 | 1 | 1 | 1 | 10 | 1 | 15054.5702 | -0.0021 |
| 2 | 1 | 2 | 1 | 16 | 1 | 1 | 1 | 1 | 1 | 10 | 1 | 15054.5702 | -0.0022 |

Table S8: Observed Transition Frequencies (in MHz) for (Z)-CHDC<sup>35</sup>ClF

|   |   |   |   |    |   |   |   |   |   |    |   |            |         |
|---|---|---|---|----|---|---|---|---|---|----|---|------------|---------|
| 2 | 1 | 2 | 1 | 13 | 2 | 1 | 1 | 1 | 1 | 7  | 2 | 15054.5771 | -0.0014 |
| 2 | 1 | 2 | 0 | 3  | 2 | 1 | 1 | 1 | 0 | 3  | 3 | 15058.1243 | -0.0001 |
| 2 | 1 | 2 | 0 | 3  | 3 | 1 | 1 | 1 | 0 | 3  | 3 | 15058.1407 | 0.0008  |
| 2 | 1 | 2 | 0 | 3  | 4 | 1 | 1 | 1 | 0 | 3  | 4 | 15058.1582 | 0.0000  |
| 2 | 1 | 2 | 0 | 3  | 2 | 1 | 1 | 1 | 0 | 3  | 2 | 15058.1671 | 0.0011  |
| 2 | 1 | 2 | 1 | 19 | 1 | 1 | 1 | 1 | 1 | 12 | 1 | 15063.1124 | -0.0027 |
| 2 | 1 | 2 | 1 | 19 | 1 | 1 | 1 | 1 | 1 | 15 | 0 | 15063.1190 | 0.0000  |
| 2 | 1 | 2 | 1 | 17 | 1 | 1 | 1 | 1 | 1 | 5  | 2 | 15063.1255 | -0.0033 |
| 2 | 1 | 2 | 1 | 14 | 2 | 1 | 1 | 1 | 1 | 3  | 3 | 15063.1338 | -0.0026 |
| 2 | 1 | 2 | 1 | 17 | 1 | 1 | 1 | 1 | 1 | 10 | 1 | 15063.1513 | -0.0050 |
| 2 | 1 | 2 | 1 | 14 | 2 | 1 | 1 | 1 | 1 | 7  | 2 | 15063.1620 | -0.0026 |
| 2 | 1 | 2 | 1 | 19 | 1 | 1 | 1 | 1 | 1 | 7  | 2 | 15063.1620 | -0.0027 |
| 2 | 1 | 2 | 0 | 2  | 2 | 1 | 1 | 1 | 0 | 3  | 3 | 15064.2631 | -0.0032 |
| 2 | 1 | 2 | 0 | 2  | 3 | 1 | 1 | 1 | 0 | 3  | 4 | 15064.2922 | -0.0031 |
| 2 | 1 | 2 | 0 | 2  | 1 | 1 | 1 | 1 | 0 | 3  | 2 | 15064.3047 | -0.0029 |
| 2 | 1 | 2 | 1 | 1  | 4 | 1 | 1 | 1 | 1 | 1  | 3 | 15066.7224 | 0.0037  |
| 2 | 1 | 2 | 1 | 2  | 4 | 1 | 1 | 1 | 1 | 2  | 3 | 15066.7224 | 0.0017  |
| 2 | 1 | 2 | 1 | 0  | 5 | 1 | 1 | 1 | 1 | 0  | 4 | 15066.7224 | 0.0007  |
| 2 | 1 | 2 | 1 | 6  | 3 | 1 | 1 | 1 | 1 | 6  | 2 | 15066.7269 | 0.0007  |
| 2 | 1 | 2 | 1 | 11 | 2 | 1 | 1 | 1 | 1 | 11 | 1 | 15072.0682 | 0.0018  |
| 2 | 1 | 2 | 1 | 20 | 0 | 1 | 1 | 1 | 1 | 13 | 1 | 15072.0762 | 0.0041  |
| 2 | 1 | 2 | 1 | 16 | 1 | 1 | 1 | 1 | 1 | 16 | 0 | 15072.0762 | 0.0040  |
| 2 | 1 | 2 | 1 | 8  | 3 | 1 | 1 | 1 | 1 | 8  | 2 | 15072.0838 | 0.0021  |
| 2 | 1 | 2 | 1 | 17 | 1 | 1 | 1 | 1 | 1 | 11 | 1 | 15080.6566 | 0.0062  |
| 2 | 1 | 2 | 1 | 17 | 1 | 1 | 1 | 1 | 1 | 16 | 0 | 15080.6566 | 0.0005  |
| 2 | 1 | 2 | 1 | 21 | 0 | 1 | 1 | 1 | 1 | 11 | 1 | 15080.6623 | 0.0001  |
| 2 | 1 | 2 | 1 | 14 | 2 | 1 | 1 | 1 | 1 | 13 | 1 | 15080.6684 | 0.0005  |
| 2 | 1 | 2 | 1 | 14 | 2 | 1 | 1 | 1 | 1 | 8  | 2 | 15080.6684 | 0.0004  |
| 2 | 1 | 2 | 1 | 19 | 1 | 1 | 1 | 1 | 1 | 8  | 2 | 15080.6684 | 0.0003  |
| 2 | 0 | 2 | 1 | 11 | 2 | 1 | 0 | 1 | 1 | 11 | 1 | 16382.8112 | -0.0002 |
| 2 | 0 | 2 | 1 | 8  | 3 | 1 | 0 | 1 | 1 | 8  | 2 | 16382.8247 | 0.0013  |
| 2 | 0 | 2 | 0 | 3  | 2 | 1 | 0 | 1 | 0 | 3  | 2 | 16384.9669 | -0.0011 |
| 2 | 0 | 2 | 0 | 3  | 4 | 1 | 0 | 1 | 0 | 3  | 4 | 16384.9705 | -0.0009 |
| 2 | 0 | 2 | 0 | 3  | 3 | 1 | 0 | 1 | 0 | 3  | 3 | 16384.9815 | 0.0022  |
| 2 | 0 | 2 | 0 | 2  | 1 | 1 | 0 | 1 | 0 | 3  | 2 | 16397.4680 | -0.0050 |
| 2 | 0 | 2 | 0 | 2  | 3 | 1 | 0 | 1 | 0 | 3  | 4 | 16397.4715 | -0.0049 |
| 2 | 0 | 2 | 0 | 2  | 2 | 1 | 0 | 1 | 0 | 3  | 3 | 16397.4820 | -0.0022 |
| 2 | 0 | 2 | 1 | 17 | 1 | 1 | 0 | 1 | 1 | 11 | 1 | 16400.2803 | 0.0029  |
| 2 | 0 | 2 | 1 | 17 | 1 | 1 | 0 | 1 | 1 | 16 | 0 | 16400.2803 | -0.0007 |
| 2 | 0 | 2 | 1 | 14 | 2 | 1 | 0 | 1 | 1 | 8  | 2 | 16400.2910 | -0.0005 |
| 2 | 0 | 2 | 1 | 14 | 2 | 1 | 0 | 1 | 1 | 13 | 1 | 16400.2910 | -0.0005 |
| 2 | 0 | 2 | 1 | 19 | 1 | 1 | 0 | 1 | 1 | 8  | 2 | 16400.2910 | -0.0005 |
| 2 | 0 | 2 | 1 | 1  | 4 | 1 | 0 | 1 | 1 | 1  | 3 | 16402.4505 | 0.0018  |
| 2 | 0 | 2 | 1 | 6  | 3 | 1 | 0 | 1 | 1 | 6  | 2 | 16402.4522 | 0.0002  |

Table S8: Observed Transition Frequencies (in MHz) for (Z)-CHDC<sup>35</sup>ClF

|   |   |   |   |    |   |   |   |   |   |    |   |            |         |
|---|---|---|---|----|---|---|---|---|---|----|---|------------|---------|
| 2 | 0 | 2 | 1 | 0  | 5 | 1 | 0 | 1 | 1 | 0  | 4 | 16402.4559 | 0.0008  |
| 2 | 0 | 2 | 1 | 4  | 3 | 1 | 0 | 1 | 1 | 4  | 2 | 16402.4559 | -0.0015 |
| 2 | 0 | 2 | 1 | 2  | 4 | 1 | 0 | 1 | 1 | 2  | 3 | 16402.4597 | -0.0045 |
| 2 | 0 | 2 | 1 | 10 | 2 | 1 | 0 | 1 | 1 | 10 | 1 | 16403.2734 | 0.0017  |
| 2 | 0 | 2 | 1 | 5  | 3 | 1 | 0 | 1 | 1 | 5  | 2 | 16403.2825 | 0.0030  |
| 2 | 0 | 2 | 1 | 7  | 3 | 1 | 0 | 1 | 1 | 7  | 2 | 16403.2825 | 0.0030  |
| 2 | 0 | 2 | 1 | 3  | 4 | 1 | 0 | 1 | 1 | 3  | 3 | 16403.2905 | 0.0038  |
| 2 | 0 | 2 | 1 | 11 | 2 | 1 | 0 | 1 | 1 | 10 | 1 | 16415.7750 | -0.0022 |
| 2 | 0 | 2 | 1 | 16 | 1 | 1 | 0 | 1 | 1 | 10 | 1 | 16415.7750 | -0.0022 |
| 2 | 0 | 2 | 1 | 13 | 2 | 1 | 0 | 1 | 1 | 7  | 2 | 16415.7831 | -0.0004 |
| 2 | 0 | 2 | 1 | 11 | 2 | 1 | 0 | 1 | 1 | 5  | 2 | 16415.7831 | -0.0020 |
| 2 | 0 | 2 | 1 | 8  | 3 | 1 | 0 | 1 | 1 | 3  | 3 | 16415.7917 | 0.0009  |
| 2 | 0 | 2 | 1 | 13 | 2 | 1 | 0 | 1 | 1 | 12 | 1 | 16415.7994 | 0.0021  |
| 2 | 0 | 2 | 1 | 18 | 1 | 1 | 0 | 1 | 1 | 12 | 1 | 16415.7994 | 0.0021  |
| 2 | 0 | 2 | 1 | 17 | 1 | 1 | 0 | 1 | 1 | 10 | 1 | 16433.2417 | -0.0015 |
| 2 | 0 | 2 | 1 | 19 | 1 | 1 | 0 | 1 | 1 | 7  | 2 | 16433.2501 | -0.0015 |
| 2 | 0 | 2 | 1 | 17 | 1 | 1 | 0 | 1 | 1 | 5  | 2 | 16433.2501 | -0.0010 |
| 2 | 0 | 2 | 1 | 14 | 2 | 1 | 0 | 1 | 1 | 3  | 3 | 16433.2585 | -0.0004 |
| 2 | 0 | 2 | 1 | 19 | 1 | 1 | 0 | 1 | 1 | 12 | 1 | 16433.2664 | 0.0010  |
| 4 | 1 | 3 | 1 | 11 | 4 | 4 | 0 | 4 | 1 | 17 | 3 | 18016.3251 | 0.0057  |
| 4 | 1 | 3 | 1 | 8  | 5 | 4 | 0 | 4 | 1 | 14 | 4 | 18016.3251 | 0.0032  |
| 4 | 1 | 3 | 1 | 7  | 5 | 4 | 0 | 4 | 1 | 2  | 6 | 18016.5376 | -0.0086 |
| 4 | 1 | 3 | 1 | 3  | 6 | 4 | 0 | 4 | 1 | 0  | 7 | 18016.5962 | -0.0097 |
| 4 | 1 | 3 | 0 | 5  | 5 | 4 | 0 | 4 | 0 | 4  | 4 | 18026.9223 | 0.0090  |
| 4 | 1 | 3 | 0 | 5  | 6 | 4 | 0 | 4 | 0 | 4  | 5 | 18026.9680 | 0.0048  |
| 4 | 1 | 3 | 0 | 5  | 4 | 4 | 0 | 4 | 0 | 4  | 3 | 18026.9736 | -0.0023 |
| 4 | 1 | 3 | 1 | 21 | 2 | 4 | 0 | 4 | 1 | 21 | 2 | 18031.4588 | 0.0014  |
| 4 | 1 | 3 | 1 | 19 | 3 | 4 | 0 | 4 | 1 | 19 | 3 | 18031.4642 | 0.0021  |
| 4 | 1 | 3 | 1 | 17 | 3 | 4 | 0 | 4 | 1 | 17 | 3 | 18031.5186 | 0.0016  |
| 4 | 1 | 3 | 1 | 14 | 4 | 4 | 0 | 4 | 1 | 14 | 4 | 18031.5186 | -0.0013 |
| 4 | 1 | 3 | 1 | 22 | 2 | 4 | 0 | 4 | 1 | 22 | 2 | 18031.5426 | -0.0016 |
| 4 | 1 | 3 | 1 | 4  | 5 | 4 | 0 | 4 | 1 | 4  | 5 | 18031.7353 | 0.0024  |
| 4 | 1 | 3 | 1 | 2  | 6 | 4 | 0 | 4 | 1 | 2  | 6 | 18031.7418 | 0.0015  |
| 4 | 1 | 3 | 1 | 1  | 6 | 4 | 0 | 4 | 1 | 1  | 6 | 18031.8025 | 0.0043  |
| 4 | 1 | 3 | 1 | 0  | 7 | 4 | 0 | 4 | 1 | 0  | 7 | 18031.8025 | -0.0025 |
| 4 | 1 | 3 | 1 | 6  | 5 | 4 | 0 | 4 | 1 | 6  | 5 | 18031.8227 | 0.0055  |
| 4 | 1 | 3 | 0 | 4  | 4 | 4 | 0 | 4 | 0 | 4  | 4 | 18032.2456 | -0.0024 |
| 4 | 1 | 3 | 0 | 4  | 5 | 4 | 0 | 4 | 0 | 4  | 5 | 18032.2959 | 0.0010  |
| 4 | 1 | 3 | 1 | 10 | 4 | 4 | 0 | 4 | 1 | 10 | 4 | 18032.5138 | 0.0012  |
| 4 | 1 | 3 | 1 | 7  | 5 | 4 | 0 | 4 | 1 | 7  | 5 | 18032.5200 | 0.0015  |
| 4 | 1 | 3 | 1 | 5  | 5 | 4 | 0 | 4 | 1 | 5  | 5 | 18032.5703 | 0.0020  |
| 4 | 1 | 3 | 1 | 3  | 6 | 4 | 0 | 4 | 1 | 3  | 6 | 18032.5703 | -0.0031 |
| 4 | 1 | 3 | 1 | 12 | 4 | 4 | 0 | 4 | 1 | 12 | 4 | 18032.5892 | 0.0031  |
| 4 | 1 | 3 | 0 | 4  | 4 | 4 | 0 | 4 | 0 | 5  | 5 | 18037.8447 | -0.0078 |

Table S8: Observed Transition Frequencies (in MHz) for (Z)-CHDC<sup>35</sup>ClF

|   |   |   |   |    |   |   |   |   |   |    |   |            |         |
|---|---|---|---|----|---|---|---|---|---|----|---|------------|---------|
| 4 | 1 | 3 | 0 | 4  | 5 | 4 | 0 | 4 | 0 | 5  | 6 | 18037.8964 | -0.0052 |
| 4 | 1 | 3 | 0 | 4  | 3 | 4 | 0 | 4 | 0 | 5  | 4 | 18037.9142 | -0.0004 |
| 4 | 1 | 3 | 1 | 21 | 2 | 4 | 0 | 4 | 1 | 16 | 3 | 18047.4374 | 0.0013  |
| 4 | 1 | 3 | 1 | 19 | 3 | 4 | 0 | 4 | 1 | 13 | 4 | 18047.4374 | -0.0033 |
| 4 | 1 | 3 | 1 | 17 | 3 | 4 | 0 | 4 | 1 | 11 | 4 | 18047.4906 | -0.0019 |
| 4 | 1 | 3 | 1 | 14 | 4 | 4 | 0 | 4 | 1 | 8  | 5 | 18047.4906 | -0.0056 |
| 4 | 1 | 3 | 1 | 23 | 1 | 4 | 0 | 4 | 1 | 20 | 2 | 18047.5088 | 0.0029  |
| 4 | 1 | 3 | 1 | 2  | 6 | 4 | 0 | 4 | 1 | 7  | 5 | 18047.7140 | 0.0014  |
| 4 | 1 | 3 | 1 | 0  | 7 | 4 | 0 | 4 | 1 | 3  | 6 | 18047.7757 | 0.0033  |
| 4 | 1 | 3 | 1 | 6  | 5 | 4 | 0 | 4 | 1 | 12 | 4 | 18047.7829 | -0.0023 |
| 2 | 1 | 1 | 1 | 10 | 2 | 1 | 1 | 0 | 1 | 10 | 1 | 18541.7797 | 0.0010  |
| 2 | 1 | 1 | 1 | 7  | 3 | 1 | 1 | 0 | 1 | 7  | 2 | 18541.7887 | 0.0031  |
| 2 | 1 | 1 | 1 | 15 | 1 | 1 | 1 | 0 | 1 | 10 | 1 | 18541.7955 | -0.0038 |
| 2 | 1 | 1 | 1 | 10 | 2 | 1 | 1 | 0 | 1 | 5  | 2 | 18541.7955 | -0.0042 |
| 2 | 1 | 1 | 1 | 7  | 3 | 1 | 1 | 0 | 1 | 3  | 3 | 18541.8062 | 0.0008  |
| 2 | 1 | 1 | 1 | 12 | 2 | 1 | 1 | 0 | 1 | 7  | 2 | 18541.8062 | -0.0032 |
| 2 | 1 | 1 | 1 | 5  | 3 | 1 | 1 | 0 | 1 | 5  | 2 | 18541.8193 | 0.0021  |
| 2 | 1 | 1 | 1 | 3  | 4 | 1 | 1 | 0 | 1 | 3  | 3 | 18541.8257 | 0.0022  |
| 2 | 1 | 1 | 1 | 12 | 2 | 1 | 1 | 0 | 1 | 12 | 1 | 18541.8481 | 0.0016  |
| 2 | 1 | 1 | 1 | 11 | 2 | 1 | 1 | 0 | 1 | 10 | 1 | 18548.7421 | -0.0017 |
| 2 | 1 | 1 | 1 | 16 | 1 | 1 | 1 | 0 | 1 | 10 | 1 | 18548.7421 | -0.0018 |
| 2 | 1 | 1 | 1 | 13 | 2 | 1 | 1 | 0 | 1 | 7  | 2 | 18548.7518 | -0.0005 |
| 2 | 1 | 1 | 1 | 11 | 2 | 1 | 1 | 0 | 1 | 5  | 2 | 18548.7640 | -0.0008 |
| 2 | 1 | 1 | 1 | 8  | 3 | 1 | 1 | 0 | 1 | 3  | 3 | 18548.7707 | -0.0014 |
| 2 | 1 | 1 | 1 | 13 | 2 | 1 | 1 | 0 | 1 | 12 | 1 | 18548.7872 | -0.0022 |
| 2 | 1 | 1 | 1 | 18 | 1 | 1 | 1 | 0 | 1 | 12 | 1 | 18548.7872 | -0.0021 |
| 2 | 1 | 1 | 0 | 3  | 3 | 1 | 1 | 0 | 0 | 3  | 2 | 18550.3620 | 0.0002  |
| 2 | 1 | 1 | 0 | 3  | 4 | 1 | 1 | 0 | 0 | 3  | 4 | 18550.3855 | -0.0003 |
| 2 | 1 | 1 | 0 | 3  | 3 | 1 | 1 | 0 | 0 | 3  | 3 | 18550.3925 | 0.0004  |
| 2 | 1 | 1 | 0 | 2  | 1 | 1 | 1 | 0 | 0 | 3  | 2 | 18557.3212 | -0.0055 |
| 2 | 1 | 1 | 0 | 2  | 3 | 1 | 1 | 0 | 0 | 3  | 4 | 18557.3321 | -0.0037 |
| 2 | 1 | 1 | 0 | 2  | 2 | 1 | 1 | 0 | 0 | 3  | 3 | 18557.3535 | -0.0037 |
| 2 | 1 | 1 | 1 | 14 | 2 | 1 | 1 | 0 | 1 | 7  | 2 | 18558.4942 | -0.0027 |
| 2 | 1 | 1 | 1 | 19 | 1 | 1 | 1 | 0 | 1 | 7  | 2 | 18558.4942 | -0.0027 |
| 2 | 1 | 1 | 1 | 17 | 1 | 1 | 1 | 0 | 1 | 5  | 2 | 18558.5011 | -0.0052 |
| 2 | 1 | 1 | 1 | 14 | 2 | 1 | 1 | 0 | 1 | 3  | 3 | 18558.5135 | -0.0032 |
| 2 | 1 | 1 | 1 | 19 | 1 | 1 | 1 | 0 | 1 | 12 | 1 | 18558.5304 | -0.0036 |
| 2 | 1 | 1 | 1 | 2  | 4 | 1 | 1 | 0 | 1 | 2  | 3 | 18560.1027 | -0.0008 |
| 2 | 1 | 1 | 1 | 0  | 5 | 1 | 1 | 0 | 1 | 0  | 4 | 18560.1193 | -0.0007 |
| 2 | 1 | 1 | 1 | 6  | 3 | 1 | 1 | 0 | 1 | 6  | 2 | 18560.1264 | 0.0040  |
| 2 | 1 | 1 | 1 | 11 | 2 | 1 | 1 | 0 | 1 | 11 | 1 | 18564.2003 | 0.0033  |
| 2 | 1 | 1 | 1 | 20 | 0 | 1 | 1 | 0 | 1 | 13 | 1 | 18564.2060 | 0.0020  |
| 2 | 1 | 1 | 1 | 16 | 1 | 1 | 1 | 0 | 1 | 16 | 0 | 18564.2060 | 0.0019  |
| 2 | 1 | 1 | 1 | 8  | 3 | 1 | 1 | 0 | 1 | 8  | 2 | 18564.2176 | 0.0009  |

Table S8: Observed Transition Frequencies (in MHz) for (Z)-CHDC<sup>35</sup>ClF

|   |   |   |   |    |   |   |   |   |   |    |   |            |         |
|---|---|---|---|----|---|---|---|---|---|----|---|------------|---------|
| 2 | 1 | 1 | 1 | 17 | 1 | 1 | 1 | 0 | 1 | 16 | 0 | 18573.9461 | 0.0005  |
| 2 | 1 | 1 | 1 | 21 | 0 | 1 | 1 | 0 | 1 | 11 | 1 | 18573.9534 | -0.0009 |
| 2 | 1 | 1 | 1 | 14 | 2 | 1 | 1 | 0 | 1 | 13 | 1 | 18573.9612 | -0.0001 |
| 2 | 1 | 1 | 1 | 14 | 2 | 1 | 1 | 0 | 1 | 8  | 2 | 18573.9612 | -0.0001 |
| 2 | 1 | 1 | 1 | 19 | 1 | 1 | 1 | 0 | 1 | 8  | 2 | 18573.9612 | -0.0001 |
| 2 | 2 | 1 | 1 | 17 | 1 | 2 | 1 | 2 | 1 | 21 | 0 | 19116.5640 | 0.0031  |
| 2 | 2 | 1 | 1 | 14 | 2 | 2 | 1 | 2 | 1 | 19 | 1 | 19116.5833 | 0.0001  |
| 2 | 2 | 1 | 1 | 14 | 2 | 2 | 1 | 2 | 1 | 14 | 2 | 19116.5833 | 0.0000  |
| 2 | 2 | 1 | 1 | 19 | 1 | 2 | 1 | 2 | 1 | 14 | 2 | 19116.5833 | 0.0000  |
| 2 | 2 | 1 | 1 | 21 | 0 | 2 | 1 | 2 | 1 | 17 | 1 | 19116.5953 | 0.0002  |
| 2 | 2 | 1 | 1 | 17 | 1 | 2 | 1 | 2 | 1 | 11 | 2 | 19125.1554 | -0.0013 |
| 2 | 2 | 1 | 1 | 14 | 2 | 2 | 1 | 2 | 1 | 8  | 3 | 19125.1683 | -0.0013 |
| 2 | 2 | 1 | 1 | 21 | 0 | 2 | 1 | 2 | 1 | 16 | 1 | 19125.1764 | -0.0026 |
| 2 | 2 | 1 | 1 | 19 | 1 | 2 | 1 | 2 | 1 | 20 | 0 | 19125.1764 | -0.0027 |
| 2 | 2 | 1 | 1 | 11 | 2 | 2 | 1 | 2 | 1 | 17 | 1 | 19134.8609 | 0.0017  |
| 2 | 2 | 1 | 1 | 8  | 3 | 2 | 1 | 2 | 1 | 14 | 2 | 19134.8681 | 0.0028  |
| 2 | 2 | 1 | 1 | 1  | 4 | 2 | 1 | 2 | 1 | 1  | 4 | 19135.7922 | -0.0022 |
| 2 | 2 | 1 | 1 | 0  | 5 | 2 | 1 | 2 | 1 | 0  | 5 | 19135.8043 | -0.0022 |
| 2 | 2 | 1 | 1 | 6  | 3 | 2 | 1 | 2 | 1 | 6  | 3 | 19135.8163 | 0.0030  |
| 2 | 2 | 1 | 1 | 11 | 2 | 2 | 1 | 2 | 1 | 11 | 2 | 19143.4432 | 0.0000  |
| 2 | 2 | 1 | 1 | 8  | 3 | 2 | 1 | 2 | 1 | 8  | 3 | 19143.4530 | 0.0014  |
| 2 | 2 | 1 | 1 | 4  | 3 | 2 | 1 | 2 | 1 | 10 | 2 | 19144.3587 | 0.0065  |
| 2 | 2 | 1 | 1 | 1  | 4 | 2 | 1 | 2 | 1 | 5  | 3 | 19144.3587 | 0.0034  |
| 2 | 2 | 1 | 1 | 2  | 4 | 2 | 1 | 2 | 1 | 7  | 3 | 19144.3727 | 0.0032  |
| 2 | 2 | 1 | 1 | 0  | 5 | 2 | 1 | 2 | 1 | 3  | 4 | 19144.3727 | 0.0029  |
| 2 | 2 | 1 | 1 | 6  | 3 | 2 | 1 | 2 | 1 | 12 | 2 | 19144.3727 | -0.0015 |
| 2 | 2 | 1 | 1 | 16 | 1 | 2 | 1 | 2 | 1 | 10 | 2 | 19149.5621 | -0.0060 |
| 2 | 2 | 1 | 1 | 13 | 2 | 2 | 1 | 2 | 1 | 7  | 3 | 19149.5733 | -0.0037 |
| 2 | 2 | 1 | 1 | 11 | 2 | 2 | 1 | 2 | 1 | 5  | 3 | 19149.5793 | -0.0013 |
| 2 | 2 | 1 | 1 | 8  | 3 | 2 | 1 | 2 | 1 | 3  | 4 | 19149.5863 | -0.0013 |
| 2 | 2 | 1 | 1 | 18 | 1 | 2 | 1 | 2 | 1 | 12 | 2 | 19149.5949 | 0.0007  |
| 2 | 2 | 1 | 1 | 10 | 2 | 2 | 1 | 2 | 1 | 4  | 3 | 19154.0935 | -0.0027 |
| 2 | 2 | 1 | 1 | 7  | 3 | 2 | 1 | 2 | 1 | 2  | 4 | 19154.1021 | -0.0030 |
| 2 | 2 | 1 | 1 | 5  | 3 | 2 | 1 | 2 | 1 | 1  | 4 | 19154.1173 | -0.0040 |
| 2 | 2 | 1 | 1 | 3  | 4 | 2 | 1 | 2 | 1 | 0  | 5 | 19154.1250 | -0.0040 |
| 2 | 2 | 1 | 1 | 12 | 2 | 2 | 1 | 2 | 1 | 6  | 3 | 19154.1349 | -0.0019 |
| 2 | 2 | 1 | 1 | 5  | 3 | 2 | 1 | 2 | 1 | 11 | 2 | 19156.5477 | 0.0029  |
| 2 | 2 | 1 | 1 | 10 | 2 | 2 | 1 | 2 | 1 | 16 | 1 | 19156.5477 | -0.0004 |
| 2 | 2 | 1 | 1 | 3  | 4 | 2 | 1 | 2 | 1 | 8  | 3 | 19156.5597 | 0.0034  |
| 2 | 2 | 1 | 1 | 7  | 3 | 2 | 1 | 2 | 1 | 13 | 2 | 19156.5647 | 0.0048  |
| 2 | 2 | 1 | 1 | 10 | 2 | 2 | 1 | 2 | 1 | 10 | 2 | 19162.6726 | -0.0005 |
| 2 | 2 | 1 | 1 | 5  | 3 | 2 | 1 | 2 | 1 | 5  | 3 | 19162.6844 | 0.0022  |
| 2 | 2 | 1 | 1 | 7  | 3 | 2 | 1 | 2 | 1 | 7  | 3 | 19162.6844 | -0.0011 |
| 2 | 2 | 1 | 1 | 3  | 4 | 2 | 1 | 2 | 1 | 3  | 4 | 19162.6944 | 0.0021  |

Table S8: Observed Transition Frequencies (in MHz) for (Z)-CHDC<sup>35</sup>ClF

|   |   |   |   |    |   |   |   |   |   |    |   |            |         |
|---|---|---|---|----|---|---|---|---|---|----|---|------------|---------|
| 2 | 1 | 2 | 1 | 11 | 2 | 1 | 0 | 1 | 1 | 11 | 1 | 19678.5463 | -0.0004 |
| 2 | 1 | 2 | 1 | 8  | 3 | 1 | 0 | 1 | 1 | 8  | 2 | 19678.5613 | 0.0016  |
| 2 | 1 | 2 | 1 | 3  | 4 | 1 | 0 | 1 | 1 | 0  | 4 | 19687.0758 | -0.0014 |
| 2 | 1 | 2 | 1 | 10 | 2 | 1 | 0 | 1 | 1 | 4  | 2 | 19687.0894 | -0.0034 |
| 2 | 1 | 2 | 1 | 7  | 3 | 1 | 0 | 1 | 1 | 2  | 3 | 19687.0894 | -0.0072 |
| 2 | 1 | 2 | 1 | 17 | 1 | 1 | 0 | 1 | 1 | 11 | 1 | 19687.1328 | 0.0022  |
| 2 | 1 | 2 | 1 | 17 | 1 | 1 | 0 | 1 | 1 | 16 | 0 | 19687.1328 | -0.0015 |
| 2 | 1 | 2 | 1 | 14 | 2 | 1 | 0 | 1 | 1 | 8  | 2 | 19687.1453 | -0.0007 |
| 2 | 1 | 2 | 1 | 14 | 2 | 1 | 0 | 1 | 1 | 13 | 1 | 19687.1453 | -0.0007 |
| 2 | 1 | 2 | 1 | 19 | 1 | 1 | 0 | 1 | 1 | 8  | 2 | 19687.1453 | -0.0008 |
| 2 | 1 | 2 | 1 | 11 | 2 | 1 | 0 | 1 | 1 | 1  | 3 | 19693.2043 | -0.0049 |
| 2 | 1 | 2 | 1 | 18 | 1 | 1 | 0 | 1 | 1 | 6  | 2 | 19693.2043 | -0.0057 |
| 2 | 1 | 2 | 1 | 8  | 3 | 1 | 0 | 1 | 1 | 0  | 4 | 19693.2081 | -0.0051 |
| 2 | 1 | 2 | 1 | 13 | 2 | 1 | 0 | 1 | 1 | 2  | 3 | 19693.2187 | -0.0035 |
| 2 | 1 | 2 | 1 | 9  | 2 | 1 | 0 | 1 | 1 | 9  | 1 | 19695.6209 | -0.0010 |
| 2 | 1 | 2 | 1 | 6  | 3 | 1 | 0 | 1 | 1 | 6  | 2 | 19695.6300 | 0.0016  |
| 2 | 1 | 2 | 1 | 1  | 4 | 1 | 0 | 1 | 1 | 1  | 3 | 19695.6356 | 0.0029  |
| 2 | 1 | 2 | 1 | 0  | 5 | 1 | 0 | 1 | 1 | 0  | 4 | 19695.6440 | 0.0036  |
| 2 | 1 | 2 | 1 | 4  | 3 | 1 | 0 | 1 | 1 | 4  | 2 | 19695.6732 | 0.0035  |
| 2 | 1 | 2 | 1 | 2  | 4 | 1 | 0 | 1 | 1 | 2  | 3 | 19695.6812 | 0.0042  |
| 2 | 1 | 2 | 1 | 5  | 3 | 1 | 0 | 1 | 1 | 5  | 2 | 19705.3856 | 0.0026  |
| 2 | 1 | 2 | 1 | 3  | 4 | 1 | 0 | 1 | 1 | 3  | 3 | 19705.3942 | 0.0031  |
| 2 | 1 | 2 | 1 | 7  | 3 | 1 | 0 | 1 | 1 | 7  | 2 | 19705.3942 | -0.0002 |
| 2 | 1 | 2 | 1 | 7  | 3 | 1 | 0 | 1 | 1 | 3  | 3 | 19705.3976 | -0.0040 |
| 2 | 1 | 2 | 1 | 11 | 2 | 1 | 0 | 1 | 1 | 10 | 1 | 19711.5094 | -0.0031 |
| 2 | 1 | 2 | 1 | 16 | 1 | 1 | 0 | 1 | 1 | 10 | 1 | 19711.5094 | -0.0032 |
| 2 | 1 | 2 | 1 | 13 | 2 | 1 | 0 | 1 | 1 | 7  | 2 | 19711.5195 | -0.0005 |
| 2 | 1 | 2 | 1 | 11 | 2 | 1 | 0 | 1 | 1 | 5  | 2 | 19711.5195 | -0.0009 |
| 2 | 1 | 2 | 1 | 8  | 3 | 1 | 0 | 1 | 1 | 3  | 3 | 19711.5280 | 0.0009  |
| 2 | 1 | 2 | 1 | 18 | 1 | 1 | 0 | 1 | 1 | 12 | 1 | 19711.5361 | 0.0025  |
| 2 | 1 | 2 | 1 | 13 | 2 | 1 | 0 | 1 | 1 | 12 | 1 | 19711.5361 | 0.0023  |
| 2 | 1 | 2 | 1 | 17 | 1 | 1 | 0 | 1 | 1 | 10 | 1 | 19720.0932 | -0.0033 |
| 2 | 1 | 2 | 1 | 17 | 1 | 1 | 0 | 1 | 1 | 5  | 2 | 19720.1036 | -0.0007 |
| 2 | 1 | 2 | 1 | 19 | 1 | 1 | 0 | 1 | 1 | 7  | 2 | 19720.1036 | -0.0026 |
| 2 | 1 | 2 | 1 | 14 | 2 | 1 | 0 | 1 | 1 | 3  | 3 | 19720.1130 | -0.0004 |
| 2 | 1 | 2 | 1 | 19 | 1 | 1 | 0 | 1 | 1 | 12 | 1 | 19720.1216 | 0.0016  |
| 3 | 0 | 3 | 0 | 4  | 4 | 2 | 1 | 2 | 0 | 4  | 4 | 20400.7737 | 0.0006  |
| 3 | 0 | 3 | 0 | 4  | 5 | 2 | 1 | 2 | 0 | 4  | 5 | 20400.7889 | -0.0023 |
| 3 | 0 | 3 | 0 | 4  | 3 | 2 | 1 | 2 | 0 | 4  | 3 | 20400.7937 | -0.0028 |
| 3 | 0 | 3 | 0 | 4  | 4 | 2 | 1 | 2 | 0 | 3  | 3 | 20409.3580 | 0.0057  |
| 3 | 0 | 3 | 0 | 4  | 5 | 2 | 1 | 2 | 0 | 3  | 4 | 20409.3580 | 0.0048  |
| 3 | 0 | 3 | 0 | 4  | 3 | 2 | 1 | 2 | 0 | 3  | 2 | 20409.3580 | 0.0030  |
| 3 | 0 | 3 | 1 | 11 | 3 | 2 | 1 | 2 | 1 | 11 | 2 | 20410.9533 | 0.0012  |
| 3 | 0 | 3 | 1 | 8  | 4 | 2 | 1 | 2 | 1 | 8  | 3 | 20410.9583 | 0.0014  |

Table S8: Observed Transition Frequencies (in MHz) for (Z)-CHDC<sup>35</sup>ClF

|   |   |   |   |    |   |   |   |   |   |    |   |            |         |
|---|---|---|---|----|---|---|---|---|---|----|---|------------|---------|
| 3 | 0 | 3 | 1 | 13 | 3 | 2 | 1 | 2 | 1 | 13 | 2 | 20410.9676 | 0.0033  |
| 3 | 0 | 3 | 0 | 3  | 3 | 2 | 1 | 2 | 0 | 3  | 3 | 20417.0883 | -0.0001 |
| 3 | 0 | 3 | 0 | 3  | 4 | 2 | 1 | 2 | 0 | 3  | 4 | 20417.0883 | -0.0032 |
| 3 | 0 | 3 | 0 | 5  | 6 | 2 | 1 | 2 | 0 | 4  | 5 | 20417.3497 | 0.0032  |
| 3 | 0 | 3 | 0 | 5  | 4 | 2 | 1 | 2 | 0 | 4  | 3 | 20417.3540 | 0.0025  |
| 3 | 0 | 3 | 1 | 22 | 1 | 2 | 1 | 2 | 1 | 19 | 1 | 20418.9318 | -0.0047 |
| 3 | 0 | 3 | 1 | 17 | 2 | 2 | 1 | 2 | 1 | 17 | 1 | 20418.9497 | 0.0030  |
| 3 | 0 | 3 | 1 | 14 | 3 | 2 | 1 | 2 | 1 | 14 | 2 | 20418.9497 | -0.0006 |
| 3 | 0 | 3 | 1 | 19 | 2 | 2 | 1 | 2 | 1 | 14 | 2 | 20418.9613 | 0.0022  |
| 3 | 0 | 3 | 1 | 19 | 2 | 2 | 1 | 2 | 1 | 19 | 1 | 20418.9613 | 0.0023  |
| 3 | 0 | 3 | 1 | 22 | 1 | 2 | 1 | 2 | 1 | 13 | 2 | 20427.5171 | -0.0056 |
| 3 | 0 | 3 | 1 | 22 | 1 | 2 | 1 | 2 | 1 | 18 | 1 | 20427.5171 | -0.0058 |
| 3 | 0 | 3 | 1 | 17 | 2 | 2 | 1 | 2 | 1 | 11 | 2 | 20427.5286 | -0.0021 |
| 3 | 0 | 3 | 1 | 14 | 3 | 2 | 1 | 2 | 1 | 8  | 3 | 20427.5351 | -0.0015 |
| 3 | 0 | 3 | 1 | 19 | 2 | 2 | 1 | 2 | 1 | 13 | 2 | 20427.5461 | 0.0008  |
| 3 | 0 | 3 | 1 | 21 | 1 | 2 | 1 | 2 | 1 | 16 | 1 | 20427.5461 | 0.0005  |
| 3 | 0 | 3 | 0 | 2  | 2 | 2 | 1 | 2 | 0 | 3  | 3 | 20433.6679 | -0.0020 |
| 3 | 0 | 3 | 0 | 2  | 3 | 2 | 1 | 2 | 0 | 3  | 4 | 20433.6679 | -0.0033 |

Table S9: Observed Transition Frequencies (in MHz) for an excited state of CH<sub>2</sub>C<sup>35</sup>ClF

| $J'$ | $K_a'$ | $K_c'$ | $s'$ | $m_1'$ | $m_2'$ | $J''$ | $K_a''$ | $K_c''$ | $s''$ | $m_1''$ | $m_2''$ | Observed  | Obs - Calc |
|------|--------|--------|------|--------|--------|-------|---------|---------|-------|---------|---------|-----------|------------|
| 1    | 1      | 0      | 0    | 4      | 1      | 1     | 0       | 1       | 0     | 5       | 0       | 7230.7767 | -0.0014    |
| 1    | 1      | 0      | 0    | 4      | 1      | 1     | 0       | 1       | 0     | 4       | 1       | 7230.7810 | -0.0005    |
| 1    | 1      | 0      | 0    | 5      | 0      | 1     | 0       | 1       | 0     | 4       | 1       | 7230.7904 | 0.0017     |
| 1    | 1      | 0      | 0    | 1      | 2      | 1     | 0       | 1       | 0     | 0       | 3       | 7252.2266 | -0.0031    |
| 1    | 1      | 0      | 0    | 1      | 2      | 1     | 0       | 1       | 0     | 1       | 2       | 7252.2343 | -0.0015    |
| 1    | 1      | 0      | 0    | 0      | 3      | 1     | 0       | 1       | 0     | 0       | 3       | 7252.2395 | -0.0030    |
| 1    | 1      | 0      | 0    | 0      | 3      | 1     | 0       | 1       | 0     | 1       | 2       | 7252.2499 | 0.0013     |
| 1    | 1      | 0      | 0    | 2      | 2      | 1     | 0       | 1       | 0     | 0       | 3       | 7260.8258 | -0.0040    |
| 1    | 1      | 0      | 0    | 3      | 1      | 1     | 0       | 1       | 0     | 1       | 2       | 7260.8258 | -0.0045    |
| 1    | 1      | 0      | 0    | 4      | 1      | 1     | 0       | 1       | 0     | 2       | 2       | 7263.5606 | -0.0019    |
| 1    | 1      | 0      | 0    | 1      | 2      | 1     | 0       | 1       | 0     | 3       | 1       | 7270.4436 | 0.0033     |
| 1    | 1      | 0      | 0    | 0      | 3      | 1     | 0       | 1       | 0     | 2       | 2       | 7270.4531 | 0.0027     |
| 1    | 1      | 0      | 0    | 3      | 1      | 1     | 0       | 1       | 0     | 3       | 1       | 7279.0344 | -0.0004    |
| 1    | 1      | 0      | 0    | 2      | 2      | 1     | 0       | 1       | 0     | 2       | 2       | 7279.0386 | 0.0009     |
| 1    | 0      | 1      | 0    | 3      | 1      | 0     | 0       | 0       | 0     | 1       | 1       | 8523.4657 | 0.0002     |
| 1    | 0      | 1      | 0    | 2      | 2      | 0     | 0       | 0       | 0     | 0       | 2       | 8523.4657 | -0.0026    |
| 1    | 0      | 1      | 0    | 1      | 2      | 0     | 0       | 0       | 0     | 1       | 1       | 8541.6735 | 0.0035     |
| 1    | 0      | 1      | 0    | 0      | 3      | 0     | 0       | 0       | 0     | 0       | 2       | 8541.6802 | 0.0040     |
| 1    | 0      | 1      | 0    | 4      | 1      | 0     | 0       | 0       | 0     | 0       | 2       | 8556.2468 | -0.0025    |
| 2    | 1      | 1      | 0    | 4      | 2      | 2     | 0       | 2       | 0     | 6       | 1       | 9230.1773 | 0.0012     |
| 2    | 1      | 1      | 0    | 3      | 2      | 2     | 0       | 2       | 0     | 1       | 3       | 9235.9003 | -0.0054    |
| 2    | 1      | 1      | 0    | 2      | 3      | 2     | 0       | 2       | 0     | 0       | 4       | 9235.9003 | -0.0073    |
| 2    | 1      | 1      | 0    | 7      | 0      | 2     | 0       | 2       | 0     | 6       | 1       | 9239.7890 | 0.0009     |
| 2    | 1      | 1      | 0    | 6      | 1      | 2     | 0       | 2       | 0     | 6       | 1       | 9239.8018 | -0.0008    |
| 2    | 1      | 1      | 0    | 6      | 1      | 2     | 0       | 2       | 0     | 7       | 0       | 9239.8127 | -0.0001    |
| 2    | 1      | 1      | 0    | 3      | 2      | 2     | 0       | 2       | 0     | 5       | 1       | 9240.9272 | 0.0021     |
| 2    | 1      | 1      | 0    | 2      | 3      | 2     | 0       | 2       | 0     | 4       | 2       | 9240.9338 | 0.0033     |
| 2    | 1      | 1      | 0    | 1      | 3      | 2     | 0       | 2       | 0     | 1       | 3       | 9245.5122 | -0.0001    |
| 2    | 1      | 1      | 0    | 0      | 4      | 2     | 0       | 2       | 0     | 0       | 4       | 9245.5160 | -0.0011    |
| 2    | 1      | 1      | 0    | 5      | 1      | 2     | 0       | 2       | 0     | 5       | 1       | 9247.7944 | -0.0012    |
| 2    | 1      | 1      | 0    | 4      | 2      | 2     | 0       | 2       | 0     | 4       | 2       | 9247.7987 | -0.0002    |
| 2    | 1      | 1      | 0    | 3      | 2      | 2     | 0       | 2       | 0     | 3       | 2       | 9253.5392 | -0.0006    |
| 2    | 1      | 1      | 0    | 2      | 3      | 2     | 0       | 2       | 0     | 2       | 3       | 9253.5439 | 0.0002     |
| 2    | 1      | 1      | 0    | 7      | 0      | 2     | 0       | 2       | 0     | 5       | 1       | 9257.4156 | -0.0036    |
| 2    | 1      | 1      | 0    | 6      | 1      | 2     | 0       | 2       | 0     | 4       | 2       | 9257.4232 | -0.0022    |
| 2    | 1      | 1      | 0    | 6      | 1      | 2     | 0       | 2       | 0     | 5       | 1       | 9257.4292 | -0.0044    |
| 2    | 1      | 1      | 0    | 5      | 1      | 2     | 0       | 2       | 0     | 3       | 2       | 9260.4077 | -0.0026    |
| 2    | 1      | 1      | 0    | 4      | 2      | 2     | 0       | 2       | 0     | 2       | 3       | 9260.4077 | -0.0045    |
| 2    | 1      | 1      | 0    | 1      | 3      | 2     | 0       | 2       | 0     | 3       | 2       | 9263.1512 | 0.0048     |
| 2    | 1      | 1      | 0    | 0      | 4      | 2     | 0       | 2       | 0     | 2       | 3       | 9263.1591 | 0.0059     |
| 3    | 1      | 2      | 0    | 3      | 3      | 3     | 1       | 3       | 0     | 3       | 3       | 9973.7465 | 0.0006     |
| 3    | 1      | 2      | 0    | 2      | 4      | 3     | 1       | 3       | 0     | 2       | 4       | 9973.7465 | -0.0015    |
| 3    | 1      | 2      | 0    | 5      | 2      | 3     | 1       | 3       | 0     | 5       | 2       | 9974.1894 | 0.0005     |

Table S9: Observed Transition Frequencies (in MHz) for an excited state of CH<sub>2</sub>C<sup>35</sup>ClF

|   |   |   |   |   |   |   |   |   |   |   |   |            |         |
|---|---|---|---|---|---|---|---|---|---|---|---|------------|---------|
| 3 | 1 | 2 | 0 | 4 | 3 | 3 | 1 | 3 | 0 | 4 | 3 | 9974.1894  | -0.0015 |
| 3 | 1 | 2 | 0 | 1 | 4 | 3 | 1 | 3 | 0 | 1 | 4 | 9974.7048  | 0.0025  |
| 3 | 1 | 2 | 0 | 0 | 5 | 3 | 1 | 3 | 0 | 0 | 5 | 9974.7048  | 0.0002  |
| 3 | 1 | 2 | 0 | 7 | 1 | 3 | 1 | 3 | 0 | 7 | 1 | 9975.1429  | -0.0013 |
| 3 | 1 | 2 | 0 | 6 | 2 | 3 | 1 | 3 | 0 | 6 | 2 | 9975.1455  | -0.0008 |
| 3 | 1 | 2 | 0 | 2 | 4 | 2 | 2 | 1 | 0 | 2 | 3 | 11105.2446 | 0.0018  |
| 3 | 1 | 2 | 0 | 3 | 3 | 2 | 2 | 1 | 0 | 3 | 2 | 11105.2446 | -0.0018 |
| 3 | 1 | 2 | 0 | 4 | 3 | 2 | 2 | 1 | 0 | 2 | 3 | 11111.7499 | -0.0033 |
| 3 | 1 | 2 | 0 | 2 | 4 | 2 | 2 | 1 | 0 | 0 | 4 | 11123.4521 | -0.0001 |
| 3 | 1 | 2 | 0 | 4 | 3 | 2 | 2 | 1 | 0 | 4 | 2 | 11124.7602 | -0.0013 |
| 3 | 1 | 2 | 0 | 0 | 5 | 2 | 2 | 1 | 0 | 0 | 4 | 11137.4030 | 0.0072  |
| 3 | 1 | 2 | 0 | 1 | 4 | 2 | 2 | 1 | 0 | 1 | 3 | 11137.4104 | 0.0080  |
| 3 | 1 | 2 | 0 | 7 | 1 | 2 | 2 | 1 | 0 | 5 | 1 | 11138.7072 | -0.0046 |
| 3 | 1 | 2 | 0 | 6 | 2 | 2 | 2 | 1 | 0 | 4 | 2 | 11138.7072 | -0.0055 |
| 3 | 1 | 2 | 0 | 6 | 2 | 2 | 2 | 1 | 0 | 6 | 1 | 11156.9239 | -0.0021 |
| 2 | 0 | 2 | 0 | 3 | 2 | 1 | 1 | 1 | 0 | 3 | 1 | 11145.8984 | 0.0016  |
| 2 | 0 | 2 | 0 | 2 | 3 | 1 | 1 | 1 | 0 | 2 | 2 | 11145.9031 | 0.0020  |
| 2 | 0 | 2 | 0 | 2 | 3 | 1 | 1 | 1 | 0 | 0 | 3 | 11155.5152 | 0.0004  |
| 2 | 0 | 2 | 0 | 3 | 2 | 1 | 1 | 1 | 0 | 1 | 2 | 11155.5152 | -0.0020 |
| 2 | 0 | 2 | 0 | 5 | 1 | 1 | 1 | 1 | 0 | 3 | 1 | 11158.5128 | 0.0013  |
| 2 | 0 | 2 | 0 | 4 | 2 | 1 | 1 | 1 | 0 | 2 | 2 | 11158.5128 | -0.0016 |
| 2 | 0 | 2 | 0 | 4 | 2 | 1 | 1 | 1 | 0 | 0 | 3 | 11168.1248 | -0.0033 |
| 2 | 0 | 2 | 0 | 5 | 1 | 1 | 1 | 1 | 0 | 1 | 2 | 11168.1280 | -0.0039 |
| 2 | 0 | 2 | 0 | 1 | 3 | 1 | 1 | 1 | 0 | 1 | 2 | 11173.1560 | 0.0047  |
| 2 | 0 | 2 | 0 | 0 | 4 | 1 | 1 | 1 | 0 | 0 | 3 | 11173.1560 | 0.0051  |
| 2 | 0 | 2 | 0 | 5 | 1 | 1 | 1 | 1 | 0 | 5 | 0 | 11175.8145 | 0.0003  |
| 2 | 0 | 2 | 0 | 5 | 1 | 1 | 1 | 1 | 0 | 4 | 1 | 11175.8230 | 0.0021  |
| 2 | 0 | 2 | 0 | 4 | 2 | 1 | 1 | 1 | 0 | 4 | 1 | 11175.8296 | 0.0005  |
| 2 | 0 | 2 | 0 | 7 | 0 | 1 | 1 | 1 | 0 | 3 | 1 | 11176.1296 | -0.0027 |
| 2 | 0 | 2 | 0 | 6 | 1 | 1 | 1 | 1 | 0 | 2 | 2 | 11176.1340 | -0.0032 |
| 2 | 0 | 2 | 0 | 7 | 0 | 1 | 1 | 1 | 0 | 4 | 1 | 11193.4403 | -0.0014 |
| 2 | 0 | 2 | 0 | 6 | 1 | 1 | 1 | 1 | 0 | 5 | 0 | 11193.4443 | -0.0009 |
| 2 | 0 | 2 | 0 | 6 | 1 | 1 | 1 | 1 | 0 | 4 | 1 | 11193.4506 | -0.0013 |
| 3 | 1 | 2 | 0 | 5 | 2 | 3 | 0 | 3 | 0 | 7 | 1 | 12724.1193 | 0.0021  |
| 3 | 1 | 2 | 0 | 4 | 3 | 3 | 0 | 3 | 0 | 6 | 2 | 12724.1218 | 0.0025  |
| 3 | 1 | 2 | 0 | 3 | 3 | 3 | 0 | 3 | 0 | 1 | 4 | 12725.4996 | -0.0062 |
| 3 | 1 | 2 | 0 | 2 | 4 | 3 | 0 | 3 | 0 | 0 | 5 | 12725.4996 | -0.0084 |
| 3 | 1 | 2 | 0 | 3 | 3 | 3 | 0 | 3 | 0 | 5 | 2 | 12734.5371 | 0.0039  |
| 3 | 1 | 2 | 0 | 2 | 4 | 3 | 0 | 3 | 0 | 4 | 3 | 12734.5433 | 0.0057  |
| 3 | 1 | 2 | 0 | 7 | 1 | 3 | 0 | 3 | 0 | 7 | 1 | 12738.0661 | -0.0005 |
| 3 | 1 | 2 | 0 | 6 | 2 | 3 | 0 | 3 | 0 | 6 | 2 | 12738.0707 | 0.0002  |
| 3 | 1 | 2 | 0 | 1 | 4 | 3 | 0 | 3 | 0 | 1 | 4 | 12739.4504 | 0.0028  |
| 3 | 1 | 2 | 0 | 0 | 5 | 3 | 0 | 3 | 0 | 0 | 5 | 12739.4504 | -0.0013 |
| 3 | 1 | 2 | 0 | 5 | 2 | 3 | 0 | 3 | 0 | 5 | 2 | 12741.0435 | -0.0009 |

Table S9: Observed Transition Frequencies (in MHz) for an excited state of CH<sub>2</sub>C<sup>35</sup>ClF

|   |   |   |   |   |   |   |   |   |   |   |   |            |         |
|---|---|---|---|---|---|---|---|---|---|---|---|------------|---------|
| 3 | 1 | 2 | 0 | 4 | 3 | 3 | 0 | 3 | 0 | 4 | 3 | 12741.0478 | -0.0001 |
| 3 | 1 | 2 | 0 | 3 | 3 | 3 | 0 | 3 | 0 | 3 | 3 | 12742.4532 | 0.0002  |
| 3 | 1 | 2 | 0 | 2 | 4 | 3 | 0 | 3 | 0 | 2 | 4 | 12742.4565 | -0.0003 |
| 3 | 1 | 2 | 0 | 5 | 2 | 3 | 0 | 3 | 0 | 3 | 3 | 12748.9607 | -0.0035 |
| 3 | 1 | 2 | 0 | 4 | 3 | 3 | 0 | 3 | 0 | 2 | 4 | 12748.9607 | -0.0064 |
| 3 | 1 | 2 | 0 | 7 | 1 | 3 | 0 | 3 | 0 | 5 | 2 | 12754.9893 | -0.0044 |
| 3 | 1 | 2 | 0 | 6 | 2 | 3 | 0 | 3 | 0 | 4 | 3 | 12754.9957 | -0.0034 |
| 3 | 1 | 2 | 0 | 1 | 4 | 3 | 0 | 3 | 0 | 3 | 3 | 12756.4021 | 0.0072  |
| 3 | 1 | 2 | 0 | 0 | 5 | 3 | 0 | 3 | 0 | 2 | 4 | 12756.4090 | 0.0086  |
| 1 | 1 | 1 | 0 | 4 | 1 | 0 | 0 | 0 | 0 | 0 | 2 | 14117.0098 | -0.0020 |
| 1 | 1 | 1 | 0 | 5 | 0 | 0 | 0 | 0 | 0 | 1 | 1 | 14117.0150 | -0.0035 |
| 1 | 1 | 1 | 0 | 1 | 2 | 0 | 0 | 0 | 0 | 1 | 1 | 14124.7025 | 0.0018  |
| 1 | 1 | 1 | 0 | 0 | 3 | 0 | 0 | 0 | 0 | 0 | 2 | 14124.7134 | 0.0007  |
| 1 | 1 | 1 | 0 | 3 | 1 | 0 | 0 | 0 | 0 | 1 | 1 | 14134.3199 | -0.0012 |
| 1 | 1 | 1 | 0 | 2 | 2 | 0 | 0 | 0 | 0 | 0 | 2 | 14134.3257 | -0.0008 |
| 2 | 1 | 2 | 0 | 3 | 2 | 1 | 1 | 1 | 0 | 3 | 1 | 15393.1875 | 0.0011  |
| 2 | 1 | 2 | 0 | 2 | 3 | 1 | 1 | 1 | 0 | 2 | 2 | 15393.1944 | 0.0010  |
| 2 | 1 | 2 | 0 | 5 | 1 | 1 | 1 | 1 | 0 | 3 | 1 | 15399.3352 | 0.0034  |
| 2 | 1 | 2 | 0 | 4 | 2 | 1 | 1 | 1 | 0 | 2 | 2 | 15399.3352 | -0.0018 |
| 2 | 1 | 2 | 0 | 3 | 2 | 1 | 1 | 1 | 0 | 1 | 2 | 15402.8058 | -0.0011 |
| 2 | 1 | 2 | 0 | 2 | 3 | 1 | 1 | 1 | 0 | 0 | 3 | 15402.8058 | -0.0013 |
| 2 | 1 | 2 | 0 | 7 | 0 | 1 | 1 | 1 | 0 | 3 | 1 | 15407.9274 | -0.0027 |
| 2 | 1 | 2 | 0 | 6 | 1 | 1 | 1 | 1 | 0 | 2 | 2 | 15407.9342 | -0.0036 |
| 2 | 1 | 2 | 0 | 4 | 2 | 1 | 1 | 1 | 0 | 0 | 3 | 15408.9476 | -0.0031 |
| 2 | 1 | 2 | 0 | 5 | 1 | 1 | 1 | 1 | 0 | 1 | 2 | 15408.9476 | -0.0046 |
| 2 | 1 | 2 | 0 | 1 | 3 | 1 | 1 | 1 | 0 | 1 | 2 | 15411.3918 | 0.0041  |
| 2 | 1 | 2 | 0 | 0 | 4 | 1 | 1 | 1 | 0 | 0 | 3 | 15411.3954 | 0.0048  |
| 2 | 1 | 2 | 0 | 5 | 1 | 1 | 1 | 1 | 0 | 5 | 0 | 15416.6354 | 0.0009  |
| 2 | 1 | 2 | 0 | 5 | 1 | 1 | 1 | 1 | 0 | 4 | 1 | 15416.6439 | 0.0027  |
| 2 | 1 | 2 | 0 | 4 | 2 | 1 | 1 | 1 | 0 | 4 | 1 | 15416.6514 | -0.0003 |
| 2 | 1 | 2 | 0 | 7 | 0 | 1 | 1 | 1 | 0 | 4 | 1 | 15425.2388 | -0.0007 |
| 2 | 1 | 2 | 0 | 6 | 1 | 1 | 1 | 1 | 0 | 5 | 0 | 15425.2444 | -0.0014 |
| 2 | 1 | 2 | 0 | 6 | 1 | 1 | 1 | 1 | 0 | 4 | 1 | 15425.2509 | -0.0016 |
| 3 | 2 | 1 | 0 | 4 | 3 | 3 | 1 | 2 | 0 | 6 | 2 | 16009.4283 | 0.0022  |
| 3 | 2 | 1 | 0 | 7 | 1 | 3 | 1 | 2 | 0 | 7 | 1 | 16010.7026 | 0.0000  |
| 3 | 2 | 1 | 0 | 6 | 2 | 3 | 1 | 2 | 0 | 6 | 2 | 16010.7103 | 0.0004  |
| 3 | 2 | 1 | 0 | 3 | 3 | 3 | 1 | 2 | 0 | 1 | 4 | 16015.3502 | -0.0048 |
| 3 | 2 | 1 | 0 | 2 | 4 | 3 | 1 | 2 | 0 | 0 | 5 | 16015.3502 | -0.0101 |
| 3 | 2 | 1 | 0 | 1 | 4 | 3 | 1 | 2 | 0 | 1 | 4 | 16016.6113 | -0.0009 |
| 3 | 2 | 1 | 0 | 0 | 5 | 3 | 1 | 2 | 0 | 0 | 5 | 16016.6175 | -0.0023 |
| 3 | 2 | 1 | 0 | 3 | 3 | 3 | 1 | 2 | 0 | 5 | 2 | 16022.7907 | 0.0050  |
| 3 | 2 | 1 | 0 | 2 | 4 | 3 | 1 | 2 | 0 | 4 | 3 | 16022.7990 | 0.0055  |
| 3 | 2 | 1 | 0 | 5 | 2 | 3 | 1 | 2 | 0 | 5 | 2 | 16023.3708 | 0.0004  |
| 3 | 2 | 1 | 0 | 4 | 3 | 3 | 1 | 2 | 0 | 4 | 3 | 16023.3770 | -0.0002 |

Table S9: Observed Transition Frequencies (in MHz) for an excited state of CH<sub>2</sub>C<sup>35</sup>ClF

|   |   |   |   |   |   |   |   |   |   |   |   |            |         |
|---|---|---|---|---|---|---|---|---|---|---|---|------------|---------|
| 3 | 2 | 1 | 0 | 7 | 1 | 3 | 1 | 2 | 0 | 5 | 2 | 16024.6486 | -0.0033 |
| 3 | 2 | 1 | 0 | 6 | 2 | 3 | 1 | 2 | 0 | 4 | 3 | 16024.6586 | -0.0025 |
| 3 | 2 | 1 | 0 | 3 | 3 | 3 | 1 | 2 | 0 | 3 | 3 | 16029.2965 | -0.0004 |
| 3 | 2 | 1 | 0 | 2 | 4 | 3 | 1 | 2 | 0 | 2 | 4 | 16029.3027 | -0.0012 |
| 3 | 2 | 1 | 0 | 5 | 2 | 3 | 1 | 2 | 0 | 3 | 3 | 16029.8768 | -0.0048 |
| 3 | 2 | 1 | 0 | 4 | 3 | 3 | 1 | 2 | 0 | 2 | 4 | 16029.8821 | -0.0055 |
| 3 | 2 | 1 | 0 | 1 | 4 | 3 | 1 | 2 | 0 | 3 | 3 | 16030.5595 | 0.0055  |
| 3 | 2 | 1 | 0 | 0 | 5 | 3 | 1 | 2 | 0 | 2 | 4 | 16030.5692 | 0.0058  |
| 2 | 0 | 2 | 0 | 5 | 1 | 1 | 0 | 1 | 0 | 5 | 0 | 16736.5797 | -0.0003 |
| 2 | 0 | 2 | 0 | 4 | 2 | 1 | 0 | 1 | 0 | 4 | 1 | 16736.5931 | 0.0015  |
| 2 | 0 | 2 | 0 | 3 | 2 | 1 | 0 | 1 | 0 | 1 | 2 | 16738.5485 | 0.0006  |
| 2 | 0 | 2 | 0 | 2 | 3 | 1 | 0 | 1 | 0 | 0 | 3 | 16738.5485 | -0.0029 |
| 2 | 0 | 2 | 0 | 5 | 1 | 1 | 0 | 1 | 0 | 1 | 2 | 16751.1585 | -0.0041 |
| 2 | 0 | 2 | 0 | 4 | 2 | 1 | 0 | 1 | 0 | 0 | 3 | 16751.1585 | -0.0062 |
| 2 | 0 | 2 | 0 | 7 | 0 | 1 | 0 | 1 | 0 | 4 | 1 | 16754.2033 | -0.0009 |
| 2 | 0 | 2 | 0 | 6 | 1 | 1 | 0 | 1 | 0 | 4 | 1 | 16754.2135 | -0.0009 |
| 2 | 0 | 2 | 0 | 1 | 3 | 1 | 0 | 1 | 0 | 1 | 2 | 16756.1850 | 0.0030  |
| 2 | 0 | 2 | 0 | 0 | 4 | 1 | 0 | 1 | 0 | 0 | 3 | 16756.1916 | 0.0041  |
| 2 | 0 | 2 | 0 | 3 | 2 | 1 | 0 | 1 | 0 | 3 | 1 | 16756.7551 | 0.0027  |
| 2 | 0 | 2 | 0 | 2 | 3 | 1 | 0 | 1 | 0 | 2 | 2 | 16756.7626 | 0.0033  |
| 2 | 0 | 2 | 0 | 5 | 1 | 1 | 0 | 1 | 0 | 3 | 1 | 16769.3670 | -0.0001 |
| 2 | 0 | 2 | 0 | 4 | 2 | 1 | 0 | 1 | 0 | 2 | 2 | 16769.3722 | -0.0004 |
| 2 | 2 | 0 | 0 | 7 | 0 | 2 | 1 | 1 | 0 | 6 | 1 | 17059.6481 | 0.0045  |
| 2 | 2 | 0 | 0 | 6 | 1 | 2 | 1 | 1 | 0 | 6 | 1 | 17059.6684 | 0.0006  |
| 2 | 2 | 0 | 0 | 6 | 1 | 2 | 1 | 1 | 0 | 7 | 0 | 17059.6828 | 0.0006  |
| 2 | 2 | 0 | 0 | 7 | 0 | 2 | 1 | 1 | 0 | 5 | 1 | 17069.2806 | -0.0010 |
| 2 | 2 | 0 | 0 | 6 | 1 | 2 | 1 | 1 | 0 | 4 | 2 | 17069.2938 | -0.0005 |
| 2 | 2 | 0 | 0 | 4 | 2 | 2 | 1 | 1 | 0 | 6 | 1 | 17077.2957 | 0.0034  |
| 2 | 2 | 0 | 0 | 1 | 3 | 2 | 1 | 1 | 0 | 1 | 3 | 17079.1339 | -0.0024 |
| 2 | 2 | 0 | 0 | 0 | 4 | 2 | 1 | 1 | 0 | 0 | 4 | 17079.1448 | -0.0027 |
| 2 | 2 | 0 | 0 | 5 | 1 | 2 | 1 | 1 | 0 | 5 | 1 | 17086.9120 | 0.0010  |
| 2 | 2 | 0 | 0 | 4 | 2 | 2 | 1 | 1 | 0 | 4 | 2 | 17086.9202 | 0.0014  |
| 2 | 2 | 0 | 0 | 1 | 3 | 2 | 1 | 1 | 0 | 3 | 2 | 17088.7466 | 0.0038  |
| 2 | 2 | 0 | 0 | 0 | 4 | 2 | 1 | 1 | 0 | 2 | 3 | 17088.7598 | 0.0029  |
| 2 | 2 | 0 | 0 | 5 | 1 | 2 | 1 | 1 | 0 | 3 | 2 | 17093.7795 | -0.0020 |
| 2 | 2 | 0 | 0 | 4 | 2 | 2 | 1 | 1 | 0 | 2 | 3 | 17093.7850 | -0.0023 |
| 2 | 2 | 0 | 0 | 3 | 2 | 2 | 1 | 1 | 0 | 1 | 3 | 17096.7763 | -0.0040 |
| 2 | 2 | 0 | 0 | 2 | 3 | 2 | 1 | 1 | 0 | 0 | 4 | 17096.7815 | -0.0052 |
| 2 | 2 | 0 | 0 | 3 | 2 | 2 | 1 | 1 | 0 | 5 | 1 | 17099.5203 | 0.0039  |
| 2 | 2 | 0 | 0 | 2 | 3 | 2 | 1 | 1 | 0 | 4 | 2 | 17099.5317 | 0.0041  |
| 2 | 2 | 0 | 0 | 3 | 2 | 2 | 1 | 1 | 0 | 3 | 2 | 17106.3877 | 0.0008  |
| 2 | 2 | 0 | 0 | 2 | 3 | 2 | 1 | 1 | 0 | 2 | 3 | 17106.3965 | 0.0004  |
| 4 | 1 | 3 | 0 | 6 | 3 | 4 | 0 | 4 | 0 | 6 | 3 | 17987.4797 | -0.0032 |
| 4 | 1 | 3 | 0 | 1 | 5 | 4 | 0 | 4 | 0 | 1 | 5 | 17987.8433 | 0.0025  |

Table S9: Observed Transition Frequencies (in MHz) for an excited state of CH<sub>2</sub>C<sup>35</sup>ClF

|   |   |   |   |   |   |   |   |   |   |   |   |            |         |
|---|---|---|---|---|---|---|---|---|---|---|---|------------|---------|
| 4 | 1 | 3 | 0 | 0 | 6 | 4 | 0 | 4 | 0 | 0 | 6 | 17987.8433 | -0.0014 |
| 4 | 1 | 3 | 0 | 4 | 4 | 4 | 0 | 4 | 0 | 4 | 4 | 17988.4972 | -0.0009 |
| 4 | 1 | 3 | 0 | 3 | 4 | 4 | 0 | 4 | 0 | 3 | 4 | 17988.8530 | 0.0026  |
| 4 | 1 | 3 | 0 | 2 | 5 | 4 | 0 | 4 | 0 | 2 | 5 | 17988.8530 | -0.0012 |
| 2 | 1 | 1 | 0 | 3 | 2 | 1 | 1 | 0 | 0 | 3 | 1 | 18731.2594 | 0.0020  |
| 2 | 1 | 1 | 0 | 2 | 3 | 1 | 1 | 0 | 0 | 2 | 2 | 18731.2674 | 0.0021  |
| 2 | 1 | 1 | 0 | 5 | 1 | 1 | 1 | 0 | 0 | 3 | 1 | 18738.1270 | -0.0009 |
| 2 | 1 | 1 | 0 | 4 | 2 | 1 | 1 | 0 | 0 | 2 | 2 | 18738.1322 | -0.0016 |
| 2 | 1 | 1 | 0 | 3 | 2 | 1 | 1 | 0 | 0 | 1 | 2 | 18739.8517 | -0.0002 |
| 2 | 1 | 1 | 0 | 2 | 3 | 1 | 1 | 0 | 0 | 0 | 3 | 18739.8517 | -0.0009 |
| 2 | 1 | 1 | 0 | 4 | 2 | 1 | 1 | 0 | 0 | 0 | 3 | 18746.7171 | -0.0040 |
| 2 | 1 | 1 | 0 | 5 | 1 | 1 | 1 | 0 | 0 | 1 | 2 | 18746.7171 | -0.0053 |
| 2 | 1 | 1 | 0 | 5 | 1 | 1 | 1 | 0 | 0 | 5 | 0 | 18753.5942 | 0.0039  |
| 2 | 1 | 1 | 0 | 4 | 2 | 1 | 1 | 0 | 0 | 4 | 1 | 18753.6097 | 0.0007  |
| 3 | 0 | 3 | 0 | 3 | 3 | 2 | 1 | 2 | 0 | 1 | 3 | 20146.0259 | -0.0027 |
| 3 | 0 | 3 | 0 | 2 | 4 | 2 | 1 | 2 | 0 | 0 | 4 | 20146.0259 | -0.0033 |
| 3 | 0 | 3 | 0 | 3 | 3 | 2 | 1 | 2 | 0 | 3 | 2 | 20154.6111 | 0.0017  |
| 3 | 0 | 3 | 0 | 2 | 4 | 2 | 1 | 2 | 0 | 2 | 3 | 20154.6155 | 0.0029  |
| 3 | 0 | 3 | 0 | 5 | 2 | 2 | 1 | 2 | 0 | 5 | 1 | 20156.3835 | -0.0004 |
| 3 | 0 | 3 | 0 | 4 | 3 | 2 | 1 | 2 | 0 | 4 | 2 | 20156.3891 | 0.0008  |
| 3 | 0 | 3 | 0 | 5 | 2 | 2 | 1 | 2 | 0 | 3 | 2 | 20162.5289 | -0.0004 |
| 3 | 0 | 3 | 0 | 4 | 3 | 2 | 1 | 2 | 0 | 2 | 3 | 20162.5289 | -0.0029 |
| 3 | 0 | 3 | 0 | 1 | 4 | 2 | 1 | 2 | 0 | 1 | 3 | 20162.9811 | 0.0053  |
| 3 | 0 | 3 | 0 | 0 | 5 | 2 | 1 | 2 | 0 | 0 | 4 | 20162.9811 | 0.0032  |
| 3 | 0 | 3 | 0 | 6 | 2 | 2 | 1 | 2 | 0 | 6 | 1 | 20164.7145 | -0.0016 |
| 3 | 0 | 3 | 0 | 7 | 1 | 2 | 1 | 2 | 0 | 5 | 1 | 20173.3067 | -0.0043 |
| 3 | 0 | 3 | 0 | 6 | 2 | 2 | 1 | 2 | 0 | 4 | 2 | 20173.3145 | -0.0024 |
| 2 | 1 | 2 | 0 | 5 | 1 | 1 | 0 | 1 | 0 | 5 | 0 | 20977.3996 | -0.0007 |
| 2 | 1 | 2 | 0 | 4 | 2 | 1 | 0 | 1 | 0 | 4 | 1 | 20977.4151 | 0.0010  |
| 2 | 1 | 2 | 0 | 2 | 3 | 1 | 0 | 1 | 0 | 0 | 3 | 20985.8405 | -0.0032 |
| 2 | 1 | 2 | 0 | 7 | 0 | 1 | 0 | 1 | 0 | 4 | 1 | 20986.0009 | -0.0010 |
| 2 | 1 | 2 | 0 | 6 | 1 | 1 | 0 | 1 | 0 | 4 | 1 | 20986.0140 | -0.0010 |
| 2 | 1 | 2 | 0 | 1 | 3 | 1 | 0 | 1 | 0 | 1 | 2 | 20994.4204 | 0.0020  |
| 2 | 1 | 2 | 0 | 0 | 4 | 1 | 0 | 1 | 0 | 0 | 3 | 20994.4296 | 0.0025  |
| 2 | 1 | 2 | 0 | 3 | 2 | 1 | 0 | 1 | 0 | 3 | 1 | 21004.0439 | 0.0019  |
| 2 | 1 | 2 | 0 | 2 | 3 | 1 | 0 | 1 | 0 | 2 | 2 | 21004.0545 | 0.0029  |
| 2 | 1 | 2 | 0 | 5 | 1 | 1 | 0 | 1 | 0 | 3 | 1 | 21010.1861 | -0.0013 |
| 2 | 1 | 2 | 0 | 4 | 2 | 1 | 0 | 1 | 0 | 2 | 2 | 21010.1945 | -0.0007 |
| 2 | 1 | 2 | 0 | 6 | 1 | 1 | 0 | 1 | 0 | 2 | 2 | 21018.7942 | -0.0018 |
